# Supplementary material for: A palladium catalyzed stereo-convergent aminocarbonylation of 1,3-dienes with nitroarenes: synthesis of (E,E)-dienamides
Source: Royal Society of Chemistry journal article supplement (doi:10.1039/d2qo01478e), 2022-01-01
Supplement: d2qo01478e1.pdf [file d2qo01478e1.pdf]

## Supporting Information

### **Palladium Catalyzed Stereo-Convergent Aminocarbonylation of 1,3-Dienes with Nitroarenes: Synthesis of (*E,E*)-Dienamides**

Jin-Liang Lu,<sup>†</sup> Yun Kang,<sup>†</sup> Zhi Zhang,<sup>†</sup> Yin-Ai Huang,<sup>†</sup> Lu-Qi Tan,<sup>†</sup> Xiang-Zhi Zhang,<sup>†</sup> and Jin-Bao Peng<sup>\*,†</sup>

<sup>†</sup>School of Biotechnology and Health Sciences, Wuyi University, Jiangmen, Guangdong 529020, P. R. China; orcid.org/0000-0002-0568-7740; E-mail: pengjb\_05@126.com

## Table of Contents

|                                                      |    |
|------------------------------------------------------|----|
| 1. General Information.....                          | 3  |
| 2. General Procedure for the Starting Materials..... | 4  |
| 3. Optimization of Reaction Conditions .....         | 6  |
| 4. General Procedure .....                           | 9  |
| 5. Mechanistic Experiments.....                      | 10 |
| 6. Spectroscopic Data of Products .....              | 13 |
| 7. References .....                                  | 33 |
| 8. Copies of NMR Spectra for Compounds .....         | 34 |

## 1. General Information

### Reagents, solvents and analytical methods:

Unless otherwise noted, all reactions were carried out under a carbon monoxide or nitrogen atmosphere. All reagents were from commercial sources and used as received without further purification. All solvents were dried by standard techniques and distilled prior to use. Column chromatography was performed on silica gel (200-300 meshes) using petroleum ether (bp. 60~90 °C) and ethyl acetate as eluent. NMR spectra were recorded on a Bruker Avance operating at for  $^1\text{H}$  NMR at 500 MHz,  $^{13}\text{C}$  NMR at 126 MHz and  $^{19}\text{F}$  NMR at 471 MHz and spectral data were reported in ppm relative to Dimethyl sulfoxide- $d_6$  (DMSO- $d_6$ ) ( $^1\text{H}$  NMR  $\delta$  2.50,  $^{13}\text{C}$  NMR  $\delta$  39.5) as solvent. High-resolution mass spectra (HRMS) is produced by Thermo Fisher Scientific. Its main body is composed of two parts: Thermo Scientific's UltiMate 3000 Series liquid system and Thermo Scientific Q-Exactive combined quadrupole Orbitrap mass spectrometer. All coupling constants ( $J$ ) are reported in Hz. The following abbreviations were used to describe peak splitting patterns when appropriate: s = singlet, d = doublet, dd = double doublet, ddd = double doublet of doublets, t = triplet, dt = double triplet, q = quatrilplet, m = multiplet, br = broad.

## 2. General Procedure for the Starting Materials

### 2.1 Typical Procedure A for the Synthesis of 1,3-Dienes (**1a**, **1b**, **1k**, **1n**, **1o**, **1p**, **1r**)<sup>S1</sup>.

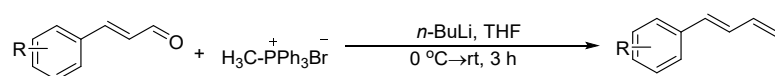

To a suspension of Methyltriphenylphosphonium bromide ( 10.0 mmol, 1.25 equiv) in THF (25 mL) was added dropwise *n*-Butyllithium (2.5 M in Hexane, 4 mL, 10 mmol, 1.25 equiv) at 0 °C. Then the reaction mixture was stirred for 2 hours and the solvent of Cinnamaldehyde compounds (8 mmol, 1.0 equiv) in THF (5 mL) was added. After stirring 30 minutes, the mixture was warmed to room temperature and stirred for additional 3 hours. Then the mixture was quenched with saturated solution of NH<sub>4</sub>Cl (20 mL), extracted with Et<sub>2</sub>O (3 × 10 mL) and dried over Na<sub>2</sub>SO<sub>4</sub>. The solvent was evaporated under reduced pressure and the residue was purified by flash column chromatography (eluted with low-boiling petroleum) on a silica gel to give the desired product.

### 2.2 Typical Procedure B for the Synthesis of 1,3-Dienes (**1c-1j**, **1l**, **1m**, **1q**, **1s-1z**, **1a-1d**).

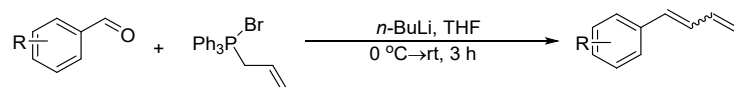

To a suspension of Allyltriphenylphosphonium bromide ( 12.5 mmol, 1.25 equiv) in THF (20 mL) was added dropwise *n*-Butyllithium (2.5 M in Hexane, 5 mL, 12.5 mmol, 1.25 equiv) at 0 °C. Then the reaction mixture was stirred for 2 hours and the solvent of Aldehydes (10 mmol, 1.0 equiv) in THF (10 mL) was added. After stirring 30 minutes, the mixture was warmed to room temperature and stirred for additional 3 hours. Then the mixture was quenched with saturated solution of NH<sub>4</sub>Cl (20 mL), extracted with Et<sub>2</sub>O (3 × 10 mL) and dried over Na<sub>2</sub>SO<sub>4</sub>. The solvent was evaporated under reduced pressure and the residue was purified by flash column chromatography (eluted with low-boiling petroleum) on a silica gel to give the desired product.

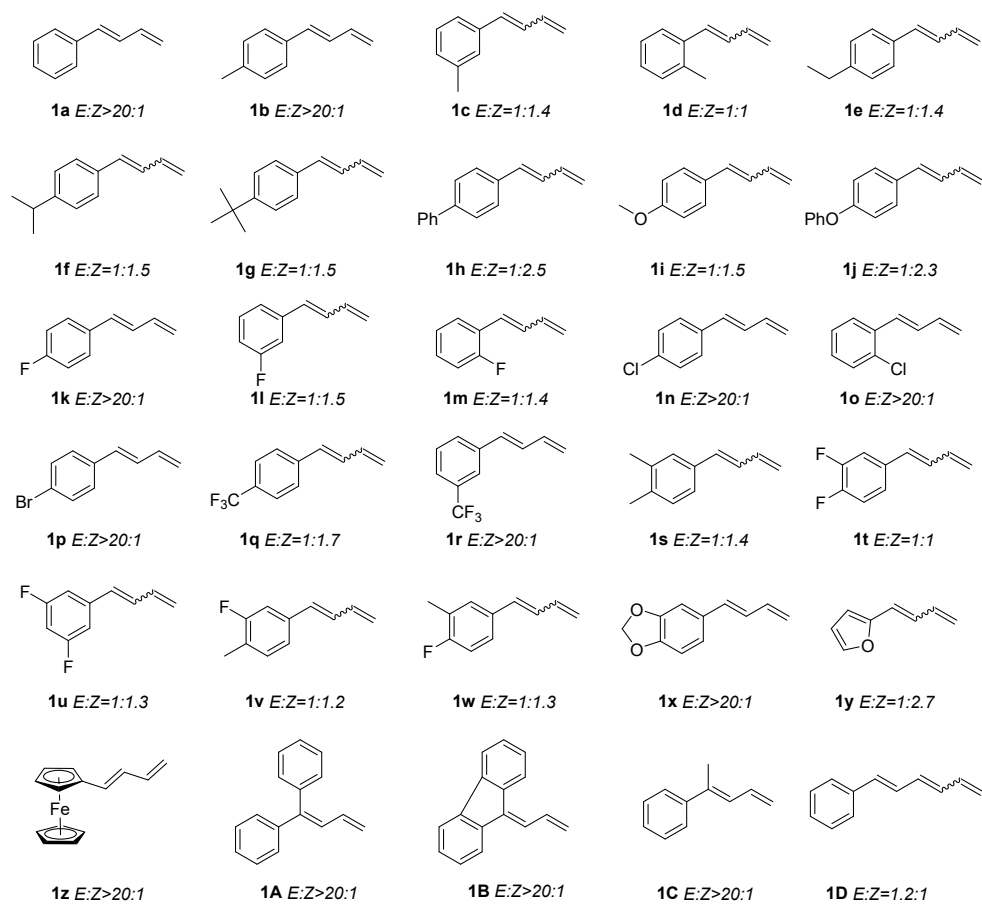

**Figure S1** Substrates of 1,3-dienes

### 2.3 Substrates of Nitrocompound ( **2a-2z,2A-2C** )<sup>S2</sup>

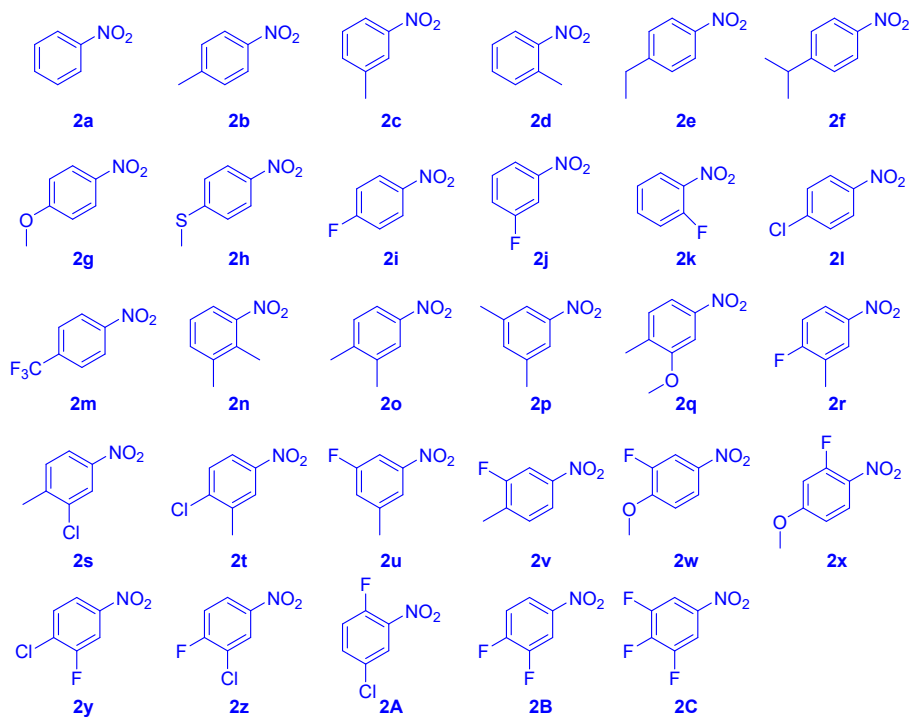

**Figure S2** Substrates of nitro-compounds

### 3. Optimization of Reaction Conditions

Table S1. Optimization of catalyst.<sup>[a]</sup>

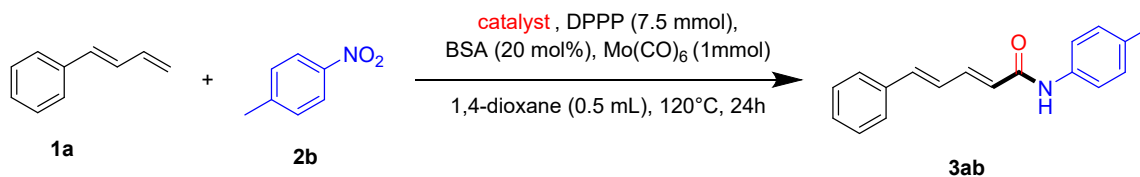

| Entry | catalyst                                                         | Yield (%) <sup>[b]</sup> |
|-------|------------------------------------------------------------------|--------------------------|
| 1     | Pd(acac) <sub>2</sub>                                            | 36%                      |
| 2     | Pd/C                                                             | 15%                      |
| 3     | PdCl <sub>2</sub>                                                | 19%                      |
| 4     | <b>Pd(PPh<sub>3</sub>)<sub>4</sub></b>                           | <b>47%</b>               |
| 5     | Pd(TFA) <sub>2</sub>                                             | 39%                      |
| 6     | Pd(OAc) <sub>2</sub>                                             | 17%                      |
| 7     | Pd <sub>2</sub> (dba) <sub>3</sub>                               | 13%                      |
| 8     | Pd <sub>2</sub> (PPh <sub>3</sub> ) <sub>2</sub> Cl <sub>2</sub> | 21%                      |
| 9     | No catalyst                                                      | ND                       |

[a] Reaction conditions: **1a** (0.5 mmol), **2b** (1.5 mmol), catalyst (5 mol%), DPPP (7.5 mol%), BSA (20 mol%), Mo(CO)<sub>6</sub> (1 mmol), 1,4-dioxane (0.5 mL), N<sub>2</sub> atmosphere, 120 °C for 24 h. [b] Isolated yield.

Table S2. Optimization of ligand.<sup>[a]</sup>

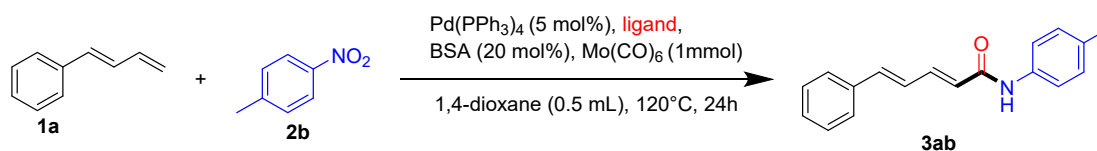

| Entry | Ligand             | Yield (%) <sup>[b]</sup> |
|-------|--------------------|--------------------------|
| 1     | <b>DPPP</b>        | <b>36%</b>               |
| 2     | PPh <sub>3</sub>   | 20%                      |
| 3     | BINAP              | trace                    |
| 4     | BuPAD <sub>2</sub> | trace                    |
| 5     | DPEPhos            | 9%                       |
| 6     | DPPF               | 13%                      |
| 7     | DPPE               | 30%                      |
| 8     | DPPB               | 27%                      |
| 9     | no ligand          | ND                       |

[a] Reaction conditions: **1a** (0.5 mmol), **2b** (1.5 mmol), Pd(acac)<sub>2</sub> (5 mol%), ligand ( bidentate ligand 7.5 mol% or monodentate ligand 15 mol%), BSA (20 mol%), Mo(CO)<sub>6</sub> (1 mmol), 1,4-dioxane (0.5 mL), N<sub>2</sub> atmosphere, 120 °C for 24 h. [b] Isolated yield.

Table S3. Optimization of the additive.<sup>[a]</sup>

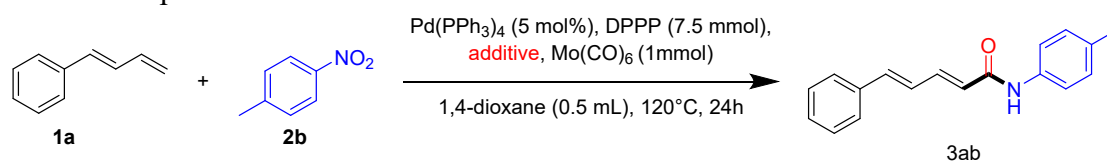

| Entry | additive                                      | Yield (%) <sup>[b]</sup> |
|-------|-----------------------------------------------|--------------------------|
| 1     | BSA                                           | 47%                      |
| 2     | 4Cl-BSA                                       | 39%                      |
| 3     | PTS                                           | 35%                      |
| 4     | PPTS                                          | 43%                      |
| 5     | <i>p</i> -Ts <sub>2</sub> O                   | 61%                      |
| 6     | no additive                                   | 41%                      |
| 7     | H <sub>2</sub> O <sup>[c]</sup>               | trace                    |
| 8     | K <sub>2</sub> CO <sub>3</sub> <sup>[d]</sup> | ND                       |

[a] Reaction conditions: **1a** (0.5 mmol), **2b** (1.5 mmol), Pd(PPh<sub>3</sub>)<sub>4</sub> (5 mol%), DPPP (7.5 mol%), additive (20 mol%), Mo(CO)<sub>6</sub> (1 mmol), 1,4-dioxane (0.5 mL), N<sub>2</sub> atmosphere, 120 °C for 24 h.

[b] Isolated yield. [c] 1 equiv. [d] 2 equiv.

Table S4. Optimization of the ratio of DPPP.<sup>[a]</sup>

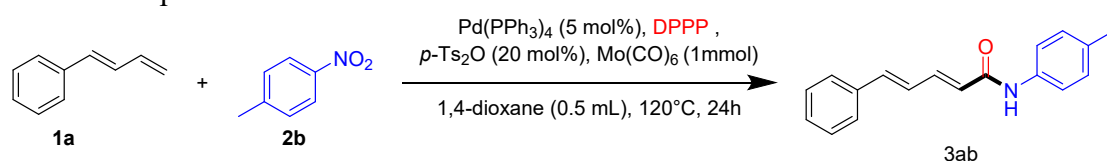

| Entry | DPPP     | Yield (%) <sup>[b]</sup> |
|-------|----------|--------------------------|
| 1     | 5 mol%   | 55%                      |
| 2     | 7.5 mol% | 61%                      |
| 3     | 10 mol%  | 52%                      |

[a] Reaction conditions: **1a** (0.5 mmol), **2b** (1.5 mmol), Pd(PPh<sub>3</sub>)<sub>4</sub> (5 mol%), DPPP, *p*-Ts<sub>2</sub>O (20 mol%), Mo(CO)<sub>6</sub> (1 mmol), 1,4-dioxane (0.5 mL), N<sub>2</sub> atmosphere, 120 °C for 24 h. [b] Isolated yield.

Table S5. Optimization of the solvent.<sup>[a]</sup>

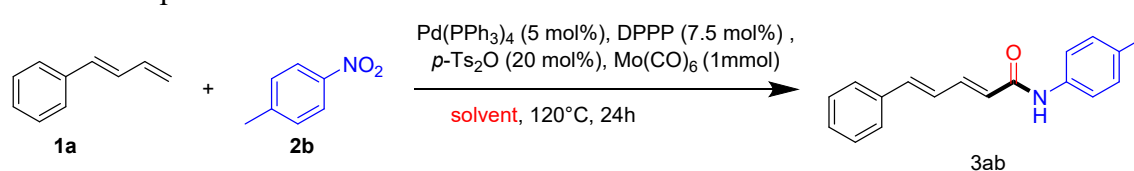

| Entry | solvent     | Yield (%) <sup>[b]</sup> |
|-------|-------------|--------------------------|
| 1     | 1,4-dioxane | 61%                      |

|   |            |            |
|---|------------|------------|
| 2 | MeCN       | 12%        |
| 3 | THF        | 41%        |
| 4 | toluene    | 59%        |
| 5 | DCE        | ND         |
| 6 | DMF        | 75%        |
| 7 | DMSO       | trace      |
| 8 | <b>NMP</b> | <b>91%</b> |
| 9 | DMA        | 69%        |

[a] Reaction conditions: **1a** (0.5 mmol), **2b** (1.5 mmol), Pd(PPh<sub>3</sub>)<sub>4</sub> (5 mol%), DPPP (7.5 mol%), *p*-Ts<sub>2</sub>O (20 mol%), Mo(CO)<sub>6</sub> (1 mmol), solvent (0.5 mL), N<sub>2</sub> atmosphere, 120 °C for 24 h. [b] Isolated yield.

Table S6. Optimization of the equivalent of **2b**.<sup>[a]</sup>

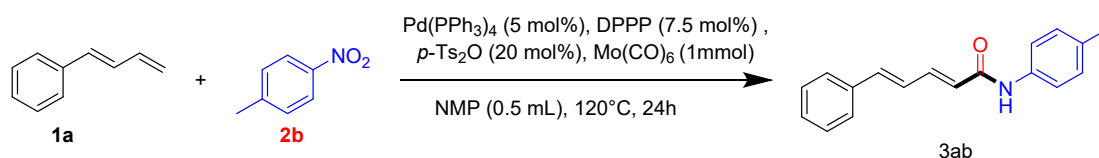

| Entry | the equivalent of <b>2b</b> | Yield (%) <sup>[b]</sup> |
|-------|-----------------------------|--------------------------|
| 1     | 1.5 equiv.                  | 39%                      |
| 2     | 2 equiv.                    | 42%                      |
| 3     | 2.5 equiv                   | 71%                      |
| 4     | <b>3 equiv.</b>             | <b>91%</b>               |

[a] Reaction conditions: **1a** (0.5 mmol), **2b**, Pd(PPh<sub>3</sub>)<sub>4</sub> (5 mol%), DPPP (7.5 mol%), *p*-Ts<sub>2</sub>O (20 mol%), Mo(CO)<sub>6</sub> (1 mmol), NMP (0.5 mL), N<sub>2</sub> atmosphere, 120 °C for 24 h. [b] Isolated yield.

Table S7. Optimization of the amount of solvent.<sup>[a]</sup>

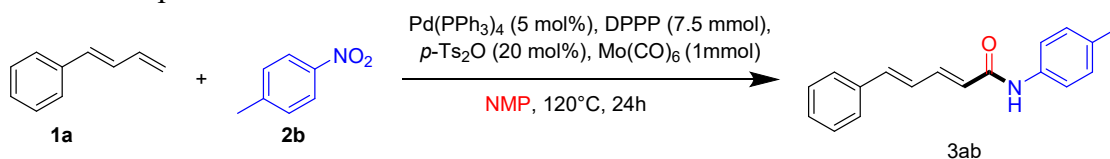

| Entry | NMP           | Yield (%) <sup>[b]</sup> |
|-------|---------------|--------------------------|
| 1     | <b>0.5 mL</b> | <b>91%</b>               |
| 2     | 1 mL          | 81%                      |
| 3     | 2 mL          | 81%                      |

[a] Reaction conditions: **1a** (0.5 mmol), **2b** (1.5 mmol), Pd(PPh<sub>3</sub>)<sub>4</sub> (5 mol%), DPPP (7.5 mol%), *p*-Ts<sub>2</sub>O (20 mol%), Mo(CO)<sub>6</sub> (1 mmol), NMP, N<sub>2</sub> atmosphere, 120 °C for 24 h. [b] Isolated yield.

Table S8. Optimization of the amount of Mo(CO)<sub>6</sub>.<sup>[a]</sup>



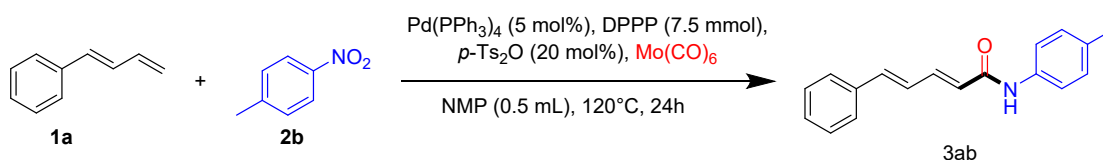

| Entry | Mo(CO) <sub>6</sub> | Yield (%) <sup>[b]</sup> |
|-------|---------------------|--------------------------|
| 1     | 0.5 mmol            | 71%                      |
| 2     | <b>1 mmol</b>       | <b>91%</b>               |

[a] Reaction conditions: **1a** (0.5 mmol), **2b** (1.5 mmol), Pd(PPh<sub>3</sub>)<sub>4</sub> (5 mol%), DPPP (7.5 mol%), *p*-Ts<sub>2</sub>O (20 mol%), Mo(CO)<sub>6</sub>, NMP (0.5 mL), N<sub>2</sub> atmosphere, 120 °C for 24 h. [b] Isolated yield.

Table S9. Optimization of the equivalent of temperature. <sup>[a]</sup>

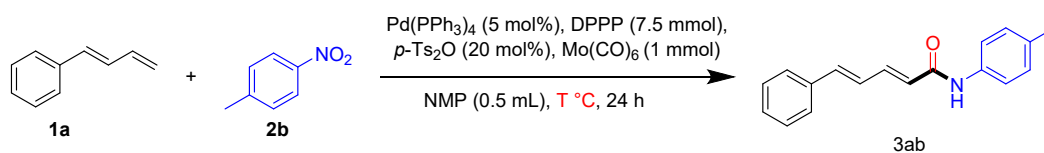

| Entry | temperature   | Yield (%) <sup>[b]</sup> |
|-------|---------------|--------------------------|
| 1     | 110 °C        | 83%                      |
| 2     | <b>120 °C</b> | <b>91%</b>               |
| 3     | 130 °C        | 60%                      |

[a] Reaction conditions: **1a** (0.5 mmol), **2b** (1.5 mmol), Pd(PPh<sub>3</sub>)<sub>4</sub> (5 mol%), DPPP (7.5 mol%), *p*-Ts<sub>2</sub>O (20 mol%), Mo(CO)<sub>6</sub> (1 mmol), NMP (0.5 mL), N<sub>2</sub> atmosphere, T °C for 24 h. [b] Isolated yield.

#### 4. General Procedure

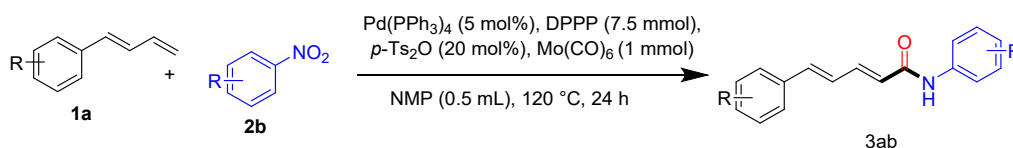

Nitrocompound (1.5 mmol), Pd(PPh<sub>3</sub>)<sub>4</sub> (5 mol%), DPPP (7.5 mol%), Mo(CO)<sub>6</sub> (1 mmol) were transferred into an 15 mL tube which was filled with nitrogen. Then, 1,3-dienes (0.5 mmol, 1 equiv.), NMP (0.5 mL) and *p*-Ts<sub>2</sub>O (20 mol%) were added to the reaction tube by syringe. The tube was sealed and the mixture was stirred at 120 °C for 24 h. After the reaction was completed, the reaction mixture was filtered and concentrated under vacuum. The crude product was purified by column chromatography on silica gel to afford the corresponding product.

## 5. Mechanistic Experiments

### 5.1 Control experiments

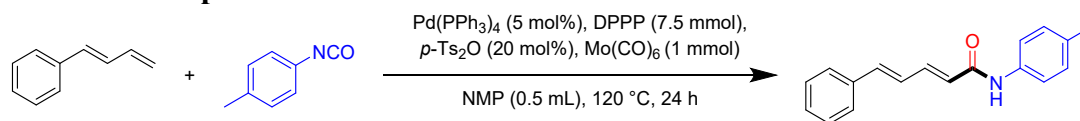

#### (2E,4E)-5-Phenyl-N-(p-tolyl)penta-2,4-dienamide (3ab)

The compound was from (*E*)-Buta-1,3-dien-1-ylbenzene (65.1 mg, 0.5 mmol, *E:Z* > 20:1) and 1-Isocyanato-4-methylbenzene (205.5 mg, 1.5 mmol). The crude residue was purified by flash chromatography (petroleum ether / ethyl acetate = 10:1, *R*<sub>f</sub> = 0.30) to give the product as a yellow solid (general procedure A: 69.6 mg, 53%, *EE/EZ* > 20:1).

### 5.2 Isotopic-labeling experiment

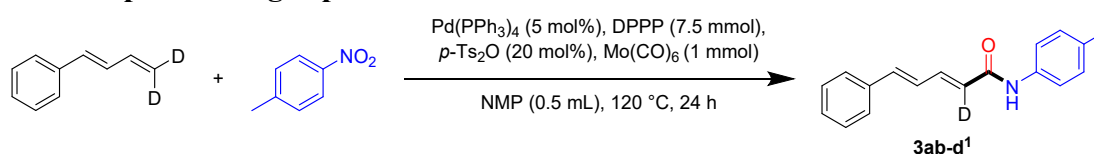

#### (2E,4E)-5-Phenyl-N-(p-tolyl)penta-2,4-dienamide (3ab-d<sup>1</sup>)

The compound was from (*E*)-(Buta-1,3-dien-1-yl-4,4-d<sub>2</sub>)benzene (33.5 mg, 0.5 mmol, *E:Z* > 20:1) and 1-Methyl-4-nitrobenzene (199.7 mg, 1.5 mmol). The crude residue was purified by flash chromatography (petroleum ether / ethyl acetate = 10:1, *R*<sub>f</sub> = 0.30) to give the product as a white solid (general procedure A: 99.1 mg, 75%, *EE/EZ* > 20:1).

<sup>1</sup>H NMR (500 MHz, DMSO) δ 10.07 (s, 1H), 7.59 (t, *J* = 7.9 Hz, 4H), 7.38 (dd, *J* = 15.8, 8.1 Hz, 2H), 7.35 – 7.29 (m, 2H), 7.12 (d, *J* = 8.0 Hz, 3H), 7.03 (d, *J* = 15.6 Hz, 1H), 6.36 (d, *J* = 14.9 Hz, 0.13H), 2.26 (s, 3H).

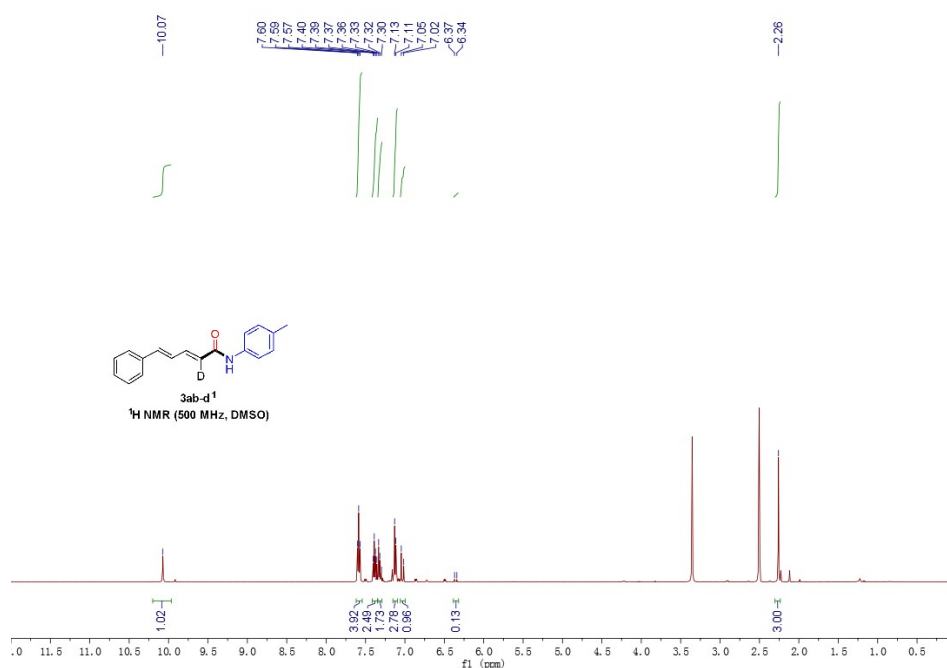

Figure S3. <sup>1</sup>H NMR (500 MHz, DMSO) spectrum of 3ab-d<sup>1</sup>

### 5.3 Intermolecular KIE experiment

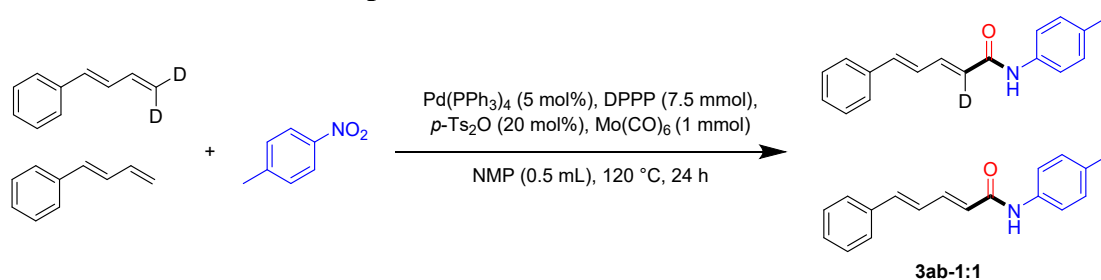

#### (2E,4E)-5-Phenyl-N-(p-tolyl)penta-2,4-dienamide (3ab-1:1)

A mix of (*E*)-(Buta-1,3-dien-1-yl-4,4-d<sub>2</sub>)benzene (33.5 mg, 0.25 mmol, *E:Z* > 20:1) and (*E*)-Buta-1,3-dien-1-ylbenzene (32.6 mg, 0.25 mmol, *E:Z* > 20:1) and 1-Methyl-4-nitrobenzene (205.5 mg, 1.5 mmol) was subjected to standard reaction conditions (120 °C, 4 h).

The crude residue was purified by flash chromatography (petroleum ether / ethyl acetate = 10:1, R<sub>f</sub> = 0.30) to give the product as a white solid (general procedure A: 60.6 mg, 46%, *EE/EZ* > 20:1).

<sup>1</sup>H NMR (500 MHz, DMSO) δ 10.06 (s, 1H), 7.58 (t, *J* = 8.2 Hz, 4H), 7.38 (t, *J* = 7.5 Hz, 2H), 7.32 (dd, *J* = 16.3, 9.2 Hz, 2H), 7.12 (d, *J* = 8.4 Hz, 3H), 7.03 (d, *J* = 15.6 Hz, 1H), 6.35 (d, *J* = 14.9 Hz, 0.49H), 2.25 (s, 3H).

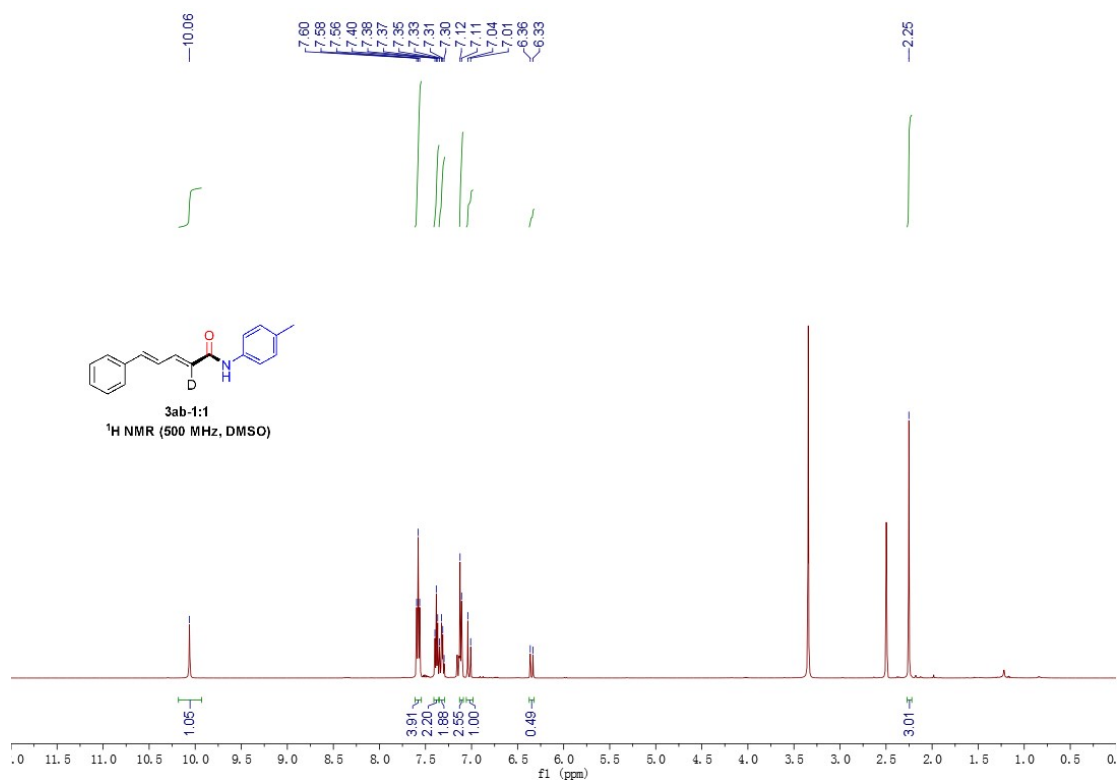

Figure S4. <sup>1</sup>H NMR (500 MHz, DMSO) spectrum of 3ab-1:1

#### 5.4 Kinetic data of aminocarbonylation of 1,3-diene 1a.

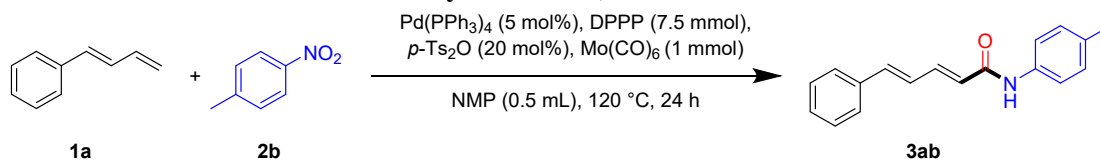

Kinetic data of cascade reaction was collected by carrying out 14 parallel reactions and quenching at different time. Following the general procedure, the 14 reaction tubes were stirred at room temperature and stopped at 0.5 h, 1 h, 1.5 h, 2 h, 3 h, 4 h, 5 h, 6 h, 8 h, 10 h, 12 h, 16 h, 20 h, 24 h respectively. The reaction mixture was concentrated under vacuum. The residue was chromatographed on silica gel.

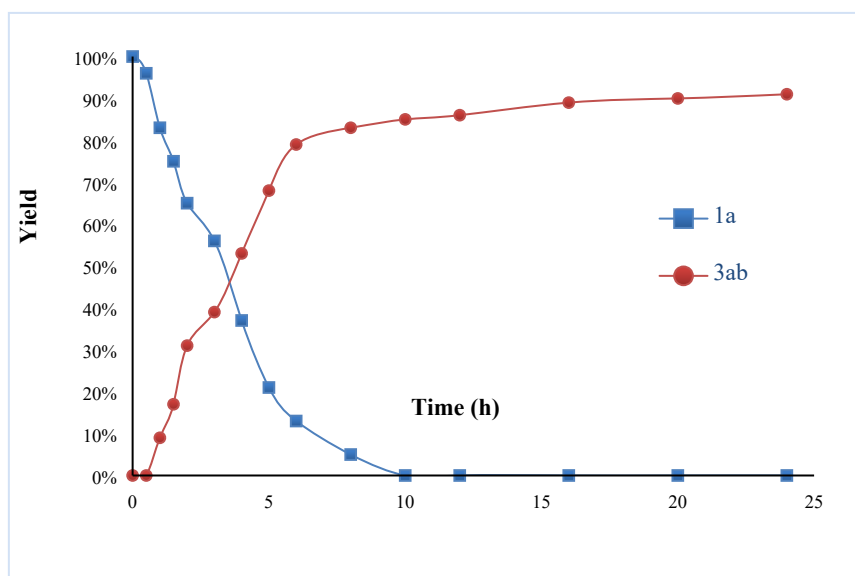

## 6. Spectroscopic Data of Products

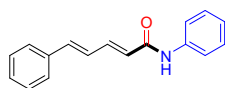

### (2E,4E)-N,5-Diphenylpenta-2,4-dienamide (3aa)

The title compound was prepared from (*E*)-Buta-1,3-dien-1-ylbenzene (65.1 mg, 0.5 mmol, *E:Z* > 20:1) and Nitrobenzene (184.6 mg, 1.5 mmol). The crude residue was purified by flash chromatography (petroleum ether / ethyl acetate = 10:1, *R*<sub>f</sub> = 0.30) to give the product as a yellow solid. (115.7 mg, 93%, *EE/EZ* > 20:1).

**<sup>1</sup>H NMR (500 MHz, DMSO)** δ 10.18 (s, 1H), 7.72 (d, *J* = 7.8 Hz, 2H), 7.59 (d, *J* = 7.4 Hz, 2H), 7.44 – 7.28 (m, 7H), 7.15 (dd, *J* = 15.5, 10.9 Hz, 1H), 7.05 (dd, *J* = 15.0, 7.3 Hz, 2H), 6.40 (d, *J* = 14.9 Hz, 1H).

**<sup>13</sup>C NMR (126 MHz, DMSO)** δ 163.9, 140.9, 139.6, 139.1, 136.4, 129.0, 128.9, 128.9, 127.3, 127.0, 125.6, 123.4, 119.4.

**HRMS (ESI) m/z:** [M+H]<sup>+</sup> Calcd for C<sub>17</sub>H<sub>16</sub>NO<sup>+</sup> 250.1226; Found 250.1224.

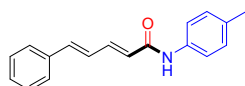

### (2E,4E)-5-Phenyl-N-(*p*-tolyl)penta-2,4-dienamide (3ab)

The title compound was prepared from (*E*)-Buta-1,3-dien-1-ylbenzene (65.1 mg, 0.5 mmol, *E:Z* > 20:1) and 1-Methyl-4-nitrobenzene (205.5 mg, 1.5 mmol). The crude residue was purified by flash chromatography (petroleum ether / ethyl acetate = 10:1, *R*<sub>f</sub> = 0.30) to give the product as a yellow solid (119.7 mg, 91%, *EE/EZ* > 20:1).

**<sup>1</sup>H NMR (500 MHz, DMSO)** δ 10.08 (s, 1H), 7.59 (dd, *J* = 7.8, 3.8 Hz, 4H), 7.41 – 7.35 (m, 3H), 7.34 – 7.29 (m, 1H), 7.14 (t, *J* = 12.5 Hz, 3H), 7.03 (d, *J* = 15.6 Hz, 1H), 6.36 (d, *J* = 14.9 Hz, 1H), 2.26 (s, 3H).

**<sup>13</sup>C NMR (126 MHz, DMSO)** δ 164.0, 141.0, 139.3, 137.4, 136.7, 132.7, 129.7, 129.3, 129.2, 127.6, 127.4, 126.0, 119.7, 20.6.

**HRMS (ESI) m/z:** [M+H]<sup>+</sup> Calcd for C<sub>18</sub>H<sub>18</sub>NO<sup>+</sup> 264.1383; Found 264.1382.

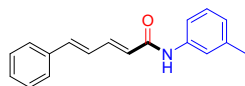

### (2E,4E)-5-Phenyl-N-(*m*-tolyl)penta-2,4-dienamide (3ac)

The title compound was prepared from (*E*)-Buta-1,3-dien-1-ylbenzene (65.1 mg, 0.5 mmol, *E:Z* > 20:1) and 1-Methyl-3-nitrobenzene (205.5 mg, 1.5 mmol). The crude residue was purified by flash chromatography (petroleum ether / ethyl acetate = 10:1, *R*<sub>f</sub> = 0.30) to give the product as a yellow solid (101.3 mg, 77%, *EE/EZ* > 20:1).

**<sup>1</sup>H NMR (500 MHz, DMSO)** δ 9.48 (s, 1H), 7.60 (d, *J* = 7.4 Hz, 2H), 7.54 (d, *J* = 7.7 Hz, 1H), 7.42 – 7.35 (m, 3H), 7.33 (dd, *J* = 11.9, 4.5 Hz, 1H), 7.23 (d, *J* = 7.5 Hz, 1H), 7.21 – 7.15 (m, 1H), 7.14 (d, *J* = 4.6 Hz, 1H), 7.10 (dd, *J* = 12.9, 5.4 Hz, 1H), 7.04 (d, *J* = 15.6 Hz, 1H), 6.50 (d, *J* = 15.0 Hz, 1H), 2.24 (s, 3H).

$^{13}\text{C}$  NMR (126 MHz, DMSO)  $\delta$  164.3, 141.1, 139.3, 136.9, 136.7, 131.9, 130.8, 129.3, 129.2, 127.6, 127.3, 126.5, 125.9, 125.6, 125.3, 18.1.

HRMS (ESI)  $m/z$ :  $[\text{M}+\text{H}]^+$  Calcd for  $\text{C}_{18}\text{H}_{18}\text{NO}^+$  264.1383; Found 264.1382.

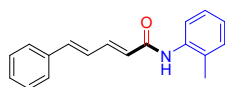

**(2E,4E)-5-Phenyl-N-(o-tolyl)penta-2,4-dienamide (3ad)**

The title compound was prepared from (*E*)-Buta-1,3-dien-1-ylbenzene (65.1 mg, 0.5 mmol, *E:Z* > 20:1) and 1-Methyl-2-nitrobenzene (205.5 mg, 1.5 mmol). The crude residue was purified by flash chromatography (petroleum ether / ethyl acetate = 8:1,  $R_f$  = 0.40) to give the product as a yellow solid (88.1 mg, 67%, *EE/EZ* > 20:1).

$^1\text{H}$  NMR (500 MHz, DMSO)  $\delta$  10.14 (s, 1H), 7.60 – 7.55 (m, 3H), 7.53 (d,  $J$  = 8.1 Hz, 1H), 7.38 (dd,  $J$  = 16.1, 9.2 Hz, 3H), 7.31 (t,  $J$  = 7.3 Hz, 1H), 7.19 (dd,  $J$  = 16.0, 8.2 Hz, 1H), 7.15 – 7.10 (m, 1H), 7.03 (d,  $J$  = 15.6 Hz, 1H), 6.87 (d,  $J$  = 7.5 Hz, 1H), 6.41 (d,  $J$  = 14.9 Hz, 1H), 2.28 (s, 3H).

$^{13}\text{C}$  NMR (126 MHz, DMSO)  $\delta$  163.9, 140.8, 139.5, 139.1, 138.1, 136.4, 129.0, 128.9, 128.8, 127.3, 127.0, 125.7, 124.2, 119.9, 116.6, 21.4.

HRMS (ESI)  $m/z$ :  $[\text{M}+\text{H}]^+$  Calcd for  $\text{C}_{18}\text{H}_{18}\text{NO}^+$  264.1383; Found 264.1381.

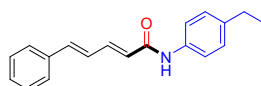

**(2E,4E)-N-(4-Ethylphenyl)-5-phenylpenta-2,4-dienamide (3ae)**

The title compound was prepared from (*E*)-Buta-1,3-dien-1-ylbenzene (65.1 mg, 0.5 mmol, *E:Z* > 20:1) and 1-Ethyl-4-nitrobenzene (225.1 mg, 1.5 mmol). The crude residue was purified by flash chromatography (petroleum ether / ethyl acetate = 10:1,  $R_f$  = 0.30) to give the product as a yellow solid (98.3 mg, 71%, *EE/EZ* = 4.5:1).

$^1\text{H}$  NMR (500 MHz, DMSO)  $\delta$  10.10 (s, 1H), 7.64 – 7.57 (m, 3H), 7.41 – 7.36 (m, 3H), 7.32 (dd,  $J$  = 15.0, 7.7 Hz, 2H), 7.19 – 7.09 (m, 3H), 7.03 (d,  $J$  = 15.6 Hz, 1H), 6.37 (d,  $J$  = 14.9 Hz, 1H), 2.55 (q,  $J$  = 7.5 Hz, 2H), 1.16 (t,  $J$  = 7.6 Hz, 3H).

$^{13}\text{C}$  NMR (126 MHz, DMSO)  $\delta$  164.1, 141.0, 139.3, 139.2, 137.6, 136.7, 129.3, 129.2, 128.5, 127.6, 127.5, 127.4, 126.1, 119.8, 28.2, 16.3.

HRMS (ESI)  $m/z$ :  $[\text{M}+\text{H}]^+$  Calcd for  $\text{C}_{19}\text{H}_{20}\text{NO}^+$  278.1539; Found 278.1537.

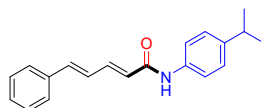

**(2E,4E)-N-(4-Isopropylphenyl)-5-phenylpenta-2,4-dienamide (3af)**

The title compound was prepared from (*E*)-Buta-1,3-dien-1-ylbenzene (65.1 mg, 0.5 mmol, *E:Z* > 20:1) and 1-Isopropyl-4-nitrobenzene (247.6 mg, 1.5 mmol). The crude residue was purified by flash chromatography (petroleum ether / ethyl acetate = 10:1,  $R_f$  = 0.30) to give the product as a yellow solid (117.9 mg, 81%, *EE/EZ* = 2.5:1).

**<sup>1</sup>H NMR (500 MHz, DMSO)** δ 10.09 (s, 1H), 7.60 (t, *J* = 7.4 Hz, 3H), 7.53 (d, *J* = 7.4 Hz, 1H), 7.45 – 7.28 (m, 4H), 7.19 (d, *J* = 8.5 Hz, 2H), 7.13 (d, *J* = 10.9 Hz, 1H), 7.03 (d, *J* = 15.6 Hz, 1H), 6.37 (d, *J* = 14.9 Hz, 1H), 2.84 (dt, *J* = 13.8, 6.9 Hz, 1H), 1.18 (d, *J* = 6.9 Hz, 6H).

**<sup>13</sup>C NMR (126 MHz, DMSO)** δ 164.0, 143.8, 141.6, 141.0, 139.7, 139.3, 137.6, 136.7, 129.4, 129.3, 127.6, 127.4, 127.3, 126.9, 126.0, 122.0, 119.7, 33.4, 24.4.

**HRMS (ESI) m/z:** [M+H]<sup>+</sup> Calcd for C<sub>20</sub>H<sub>22</sub>NO<sup>+</sup> 292.1696; Found 292.1692

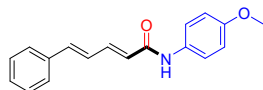

**(2*E*,4*E*)-*N*-(4-Methoxyphenyl)-5-phenylpenta-2,4-dienamide (3ag)**

The title compound was prepared from (*E*)-Buta-1,3-dien-1-ylbenzene (65.1 mg, 0.5 mmol, *E*:*Z* > 20:1) and 1-Methoxy-4-nitrobenzene (229.5 mg, 1.5 mmol). The crude residue was purified by flash chromatography (petroleum ether / ethyl acetate = 10:1, R<sub>f</sub> = 0.30) to give the product as a white solid (96.3 mg, 69%, *EE/EZ* = 12.5:1).

**<sup>1</sup>H NMR (500 MHz, DMSO)** δ 10.04 (s, 1H), 7.60 (t, *J* = 9.0 Hz, 4H), 7.40 – 7.27 (m, 4H), 7.17 – 7.08 (m, 1H), 7.02 (d, *J* = 15.6 Hz, 1H), 6.90 (d, *J* = 8.9 Hz, 2H), 6.33 (d, *J* = 14.9 Hz, 1H), 3.72 (s, 3H).

**<sup>13</sup>C NMR (126 MHz, DMSO)** δ 163.8, 155.7, 140.7, 139.1, 136.8, 133.1, 129.3, 129.2, 127.6, 127.4, 126.1, 121.1, 114.4, 55.7.

**HRMS (ESI) m/z:** [M+H]<sup>+</sup> Calcd for C<sub>18</sub>H<sub>18</sub>NO<sub>2</sub><sup>+</sup> 280.1332; Found 280.1330.

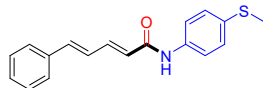

**(2*E*,4*E*)-*N*-(4-(Methylthio)phenyl)-5-phenylpenta-2,4-dienamide (3ah)**

The title compound was prepared from (*E*)-Buta-1,3-dien-1-ylbenzene (65.1 mg, 0.5 mmol, *E*:*Z* > 20:1) and Methyl(4-nitrophenyl)sulfane (253.8 mg, 1.5 mmol). The crude residue was purified by flash chromatography (petroleum ether / ethyl acetate = 10:1, R<sub>f</sub> = 0.30) to give the product as a yellow solid (92.9 mg, 63%, *EE/EZ* = 2.1:1).

**<sup>1</sup>H NMR (500 MHz, DMSO)** δ 10.18 (s, 1H), 7.67 (d, *J* = 8.1 Hz, 2H), 7.59 (d, *J* = 7.6 Hz, 2H), 7.42 – 7.34 (m, 4H), 7.24 (d, *J* = 8.5 Hz, 3H), 7.04 (d, *J* = 15.6 Hz, 1H), 6.35 (d, *J* = 14.9 Hz, 1H), 2.45 (s, 3H).

**<sup>13</sup>C NMR (126 MHz, DMSO)** δ 163.8, 141.6, 140.9, 139.6, 139.2, 136.9, 136.4, 132.0, 129.1, 129.0, 128.9, 127.3, 127.2, 127.0, 125.4, 120.0, 119.9, 15.7.

**HRMS (ESI) m/z:** [M+H]<sup>+</sup> Calcd for C<sub>18</sub>H<sub>18</sub>NOS<sup>+</sup> 296.1104; Found 296.1101.

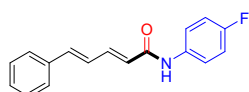

**(2*E*,4*E*)-*N*-(4-Fluorophenyl)-5-phenylpenta-2,4-dienamide (3ai)**

The title compound was prepared from (*E*)-Buta-1,3-dien-1-ylbenzene (65.1 mg, 0.5 mmol, *E*:*Z* > 20:1) and 1-Fluoro-4-nitrobenzene (211.5 mg, 1.5 mmol). The crude residue was purified by

flash chromatography (petroleum ether / ethyl acetate = 10:1, R<sub>f</sub> = 0.30) to give the product as a yellow solid (97.5 mg, 73%, *EE/EZ* = 4.7:1).

**<sup>1</sup>H NMR (500 MHz, DMSO)** δ 10.22 (s, 1H), 7.75 – 7.68 (m, 2H), 7.60 (d, *J* = 7.3 Hz, 2H), 7.42 – 7.29 (m, 4H), 7.15 (dd, *J* = 19.5, 10.3 Hz, 3H), 7.05 (d, *J* = 15.6 Hz, 1H), 6.34 (d, *J* = 14.9 Hz, 1H).

**<sup>13</sup>C NMR (126 MHz, DMSO)** δ 164.0, 159.4, 157.5, 141.3, 139.5, 136.7, 129.4, 129.3, 129.2, 127.6, 127.5, 127.3, 125.6 (d, *J* = 7.56 Hz), 121.4, 121.3, 121.2, 115.8 (d, *J* = 21.42 Hz).

**<sup>19</sup>F NMR (471 MHz, DMSO)** δ -119.29 (s).

**HRMS (ESI) m/z:** [M+H]<sup>+</sup> Calcd for C<sub>17</sub>H<sub>15</sub>FNO<sup>+</sup> 268.1132; Found 268.1128.

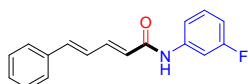

### (2*E*,4*E*)-*N*-(3-Fluorophenyl)-5-phenylpenta-2,4-dienamide (3aj)

The title compound was prepared from (*E*)-Buta-1,3-dien-1-ylbenzene (65.1 mg, 0.5 mmol, *E:Z* > 20:1) and 1-Fluoro-3-nitrobenzene (211.5 mg, 1.5 mmol). The crude residue was purified by flash chromatography (petroleum ether / ethyl acetate = 10:1, R<sub>f</sub> = 0.30) to give the product as a yellow solid (118.9 mg, 89%, *EE/EZ* = 3.7:1).

**<sup>1</sup>H NMR (500 MHz, DMSO)** δ 10.38 (s, 1H), 7.75 (d, *J* = 11.8 Hz, 1H), 7.59 (d, *J* = 7.5 Hz, 2H), 7.43 – 7.27 (m, 6H), 7.15 (dd, *J* = 15.5, 10.9 Hz, 1H), 7.05 (d, *J* = 15.6 Hz, 1H), 6.97 – 6.84 (m, 1H), 6.37 (d, *J* = 14.9 Hz, 1H).

**<sup>13</sup>C NMR (126 MHz, DMSO)** δ 165.0, 164.4, 163.5, 161.6, 141.7, 141.5 (d, *J* = 11.34 Hz), 139.7, 136.5, 130.7, 130.7, 129.2, 127.5, 127.1, 125.3, 115.3, 110.0 (d, *J* = 21.42 Hz), 106.4 (d, *J* = 26.46 Hz).

**<sup>19</sup>F NMR (471 MHz, DMSO)** δ -111.75 – -112.12 (m).

**HRMS (ESI) m/z:** [M+H]<sup>+</sup> Calcd for C<sub>17</sub>H<sub>15</sub>FNO<sup>+</sup> 268.1132; Found 268.1129.

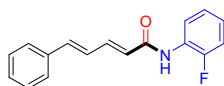

### (2*E*,4*E*)-*N*-(2-Fluorophenyl)-5-phenylpenta-2,4-dienamide (3ak)

The title compound was prepared from (*E*)-Buta-1,3-dien-1-ylbenzene (65.1 mg, 0.5 mmol, *E:Z* > 20:1) and 1-Fluoro-2-nitrobenzene (211.5 mg, 1.5 mmol). The crude residue was purified by flash chromatography (petroleum ether / ethyl acetate = 10:1, R<sub>f</sub> = 0.30) to give the product as a yellow solid (44.1 mg, 33%, *EE/EZ* > 20:1).

**<sup>1</sup>H NMR (500 MHz, DMSO)** δ 9.93 (s, 1H), 8.02 (dd, *J* = 15.1, 7.5 Hz, 1H), 7.58 (d, *J* = 7.4 Hz, 2H), 7.36 (dd, *J* = 15.1, 7.4 Hz, 3H), 7.31 (t, *J* = 7.3 Hz, 1H), 7.27 – 7.21 (m, 1H), 7.14 (tt, *J* = 10.7, 6.2 Hz, 2H), 7.09 (d, *J* = 10.4 Hz, 1H), 7.04 (d, *J* = 15.6 Hz, 1H), 6.54 (d, *J* = 15.0 Hz, 1H).

**<sup>13</sup>C NMR (126 MHz, DMSO)** δ 164.6, 141.8, 139.8, 136.6, 129.3, 127.6, 127.2, 126.8, 125.6, 125.2, 124.8, 124.4 (d, *J* = 17.64 Hz), 115.9 (d, *J* = 18.9 Hz).

**<sup>19</sup>F NMR (471 MHz, DMSO)** δ -124.70 (d, *J* = 48.1 Hz).

**HRMS (ESI) m/z:** [M+H]<sup>+</sup> Calcd for C<sub>17</sub>H<sub>15</sub>FNO<sup>+</sup> 268.1132; Found 268.1129.



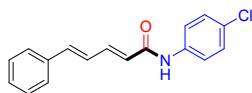

**(2E,4E)-N-(4-Chlorophenyl)-5-phenylpenta-2,4-dienamide (3al)**

The title compound was prepared from (*E*)-Buta-1,3-dien-1-ylbenzene (65.1 mg, 0.5 mmol, *E:Z* > 20:1) and 1-Chloro-4-nitrobenzene (235.0 mg, 1.5 mmol). The crude residue was purified by flash chromatography (petroleum ether / ethyl acetate = 10:1, *R<sub>f</sub>* = 0.30) to give the product as a yellow solid (93.5 mg, 66%, *EE/EZ* = 5.6:1).

**<sup>1</sup>H NMR (500 MHz, DMSO)** δ 10.30 (s, 1H), 7.73 (d, *J* = 8.9 Hz, 2H), 7.59 (d, *J* = 7.4 Hz, 2H), 7.39 (dd, *J* = 15.9, 9.8 Hz, 5H), 7.32 (t, *J* = 7.3 Hz, 1H), 7.15 (dd, *J* = 15.5, 10.9 Hz, 1H), 7.05 (d, *J* = 15.6 Hz, 1H), 6.35 (d, *J* = 14.9 Hz, 1H).

**<sup>13</sup>C NMR (126 MHz, DMSO)** δ 164.2, 141.6, 139.7, 138.8, 138.7, 136.6, 129.3, 129.1, 127.6, 127.2, 125.5, 121.2, 121.1.

**HRMS (ESI) m/z:** [M+H]<sup>+</sup> Calcd for C<sub>17</sub>H<sub>15</sub>ClNO<sup>+</sup> 284.0837; Found 284.0834.

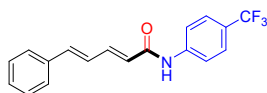

**(2E,4E)-5-Phenyl-N-(4-(trifluoromethyl)phenyl)penta-2,4-dienamide (3am)**

The title compound was prepared from (*E*)-Buta-1,3-dien-1-ylbenzene (65.1 mg, 0.5 mmol, *E:Z* > 20:1) and 1-Nitro-4-(trifluoromethyl)benzene (287.5 mg, 1.5 mmol). The crude residue was purified by flash chromatography (petroleum ether / ethyl acetate = 10:1, *R<sub>f</sub>* = 0.30) to give the product as a yellow solid (122.1 mg, 77%, *EE/EZ* = 4.7:1).

**<sup>1</sup>H NMR (500 MHz, DMSO)** δ 10.53 (s, 1H), 7.91 (d, *J* = 8.5 Hz, 2H), 7.69 (d, *J* = 8.6 Hz, 2H), 7.60 (d, *J* = 7.4 Hz, 2H), 7.49 – 7.43 (m, 1H), 7.40 (dd, *J* = 13.2, 5.8 Hz, 2H), 7.33 (t, *J* = 7.3 Hz, 1H), 7.17 (dd, *J* = 15.5, 10.8 Hz, 1H), 7.08 (d, *J* = 15.6 Hz, 1H), 6.39 (d, *J* = 14.9 Hz, 1H).

**<sup>13</sup>C NMR (126 MHz, DMSO)** δ 164.6 (d, *J* = 11.34 Hz), 142.1, 140.0, 136.5, 129.2, 129.1, 127.6, 127.1, 126.4, 125.1 (d, *J* = 7.56 Hz), 119.4 (d, *J* = 10.08 Hz).

**<sup>19</sup>F NMR (471 MHz, DMSO)** δ -60.30 (s).

**HRMS (ESI) m/z:** [M+H]<sup>+</sup> Calcd for C<sub>18</sub>H<sub>15</sub>F<sub>3</sub>NO<sup>+</sup> 318.1022; Found 318.1019.

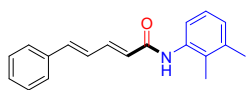

**(2E,4E)-N-(2,3-Dimethylphenyl)-5-phenylpenta-2,4-dienamide (3an)**

The title compound was prepared from (*E*)-Buta-1,3-dien-1-ylbenzene (65.1 mg, 0.5 mmol, *E:Z* > 20:1) and 1,2-Dimethyl-3-nitrobenzene (226.7 mg, 1.5 mmol). The crude residue was purified by flash chromatography (petroleum ether / ethyl acetate = 10:1, *R<sub>f</sub>* = 0.30) to give the product as a white solid (92.9 mg, 67%, *EE/EZ* > 20:1).

**<sup>1</sup>H NMR (500 MHz, DMSO)** δ 9.56 (s, 1H), 7.60 (d, *J* = 7.5 Hz, 2H), 7.39 (dd, *J* = 13.6, 5.9 Hz, 2H), 7.36 – 7.29 (m, 2H), 7.25 (t, *J* = 7.0 Hz, 1H), 7.17 – 6.97 (m, 4H), 6.46 (d, *J* = 14.9 Hz, 1H), 2.26 (s, 3H), 2.09 (s, 3H).

**<sup>13</sup>C NMR (126 MHz, DMSO)** δ 164.3, 140.8, 139.1, 137.4, 136.7, 136.6, 136.5, 129.3, 129.1, 127.5, 127.3, 125.6, 123.8, 20.7, 14.6.

**HRMS (ESI) m/z:**  $[M+H]^+$  Calcd for  $C_{19}H_{20}NO^+$  278.1539; Found 278.1537.

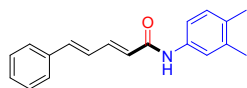

**(2E,4E)-N-(3,4-Dimethylphenyl)-5-phenylpenta-2,4-dienamide (3ao)**

The title compound was prepared from (*E*)-Buta-1,3-dien-1-ylbenzene (65.1 mg, 0.5 mmol, *E:Z* > 20:1) and 1,2-Dimethyl-4-nitrobenzene (226.7 mg, 1.5 mmol). The crude residue was purified by flash chromatography (petroleum ether / ethyl acetate = 10:1, *R*<sub>f</sub> = 0.30) to give the product as a white solid (124.7 mg, 90%, *EE/EZ* > 20:1).

**<sup>1</sup>H NMR (500 MHz, DMSO)** δ 10.01 (s, 1H), 7.59 (d, *J* = 7.4 Hz, 2H), 7.51 – 7.41 (m, 2H), 7.41 – 7.24 (m, 4H), 7.14 (dd, *J* = 15.5, 10.9 Hz, 1H), 7.05 (dd, *J* = 20.8, 11.9 Hz, 2H), 6.37 (d, *J* = 14.9 Hz, 1H), 2.20 (s, 3H), 2.17 (s, 3H).

**<sup>13</sup>C NMR (126 MHz, DMSO)** δ 163.9, 140.8, 139.2, 137.6, 136.8, 136.7, 131.5, 130.0, 129.3, 129.1, 127.6, 127.3, 126.1, 120.9, 117.2, 20.1, 19.3.

**HRMS (ESI) m/z:**  $[M+H]^+$  Calcd for  $C_{19}H_{20}NO^+$  278.1539; Found 278.1537.

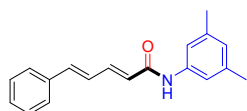

**(2E,4E)-N-(3,5-Dimethylphenyl)-5-phenylpenta-2,4-dienamide (3ap)**

The title compound was prepared from (*E*)-Buta-1,3-dien-1-ylbenzene (65.1 mg, 0.5 mmol, *E:Z* > 20:1) and 1,3-Dimethyl-5-nitrobenzene (226.7 mg, 1.5 mmol). The crude residue was purified by flash chromatography (petroleum ether / ethyl acetate = 10:1, *R*<sub>f</sub> = 0.30) to give the product as a white solid (103.9 mg, 75%, *EE/EZ* > 20:1).

**<sup>1</sup>H NMR (500 MHz, DMSO)** δ 10.01 (s, 1H), 7.59 (d, *J* = 7.7 Hz, 2H), 7.35 (dq, *J* = 23.6, 7.3 Hz, 6H), 7.18 – 7.08 (m, 1H), 7.03 (d, *J* = 15.6 Hz, 1H), 6.69 (s, 1H), 6.36 (d, *J* = 14.9 Hz, 1H), 2.24 (s, 6H).

**<sup>13</sup>C NMR (126 MHz, DMSO)** δ 164.1, 141.1, 139.7, 139.4, 138.2, 136.7, 129.3, 129.2, 127.6, 127.3, 126.1, 125.4, 117.5, 21.7.

**HRMS (ESI) m/z:**  $[M+H]^+$  Calcd for  $C_{19}H_{20}NO^+$  278.1539; Found 278.1536.

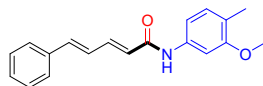

**(2E,4E)-N-(3-Methoxy-4-methylphenyl)-5-phenylpenta-2,4-dienamide (3aq)**

The title compound was prepared from (*E*)-Buta-1,3-dien-1-ylbenzene (65.1 mg, 0.5 mmol, *E:Z* > 20:1) and 2-Methoxy-1-methyl-4-nitrobenzene (250.7 mg, 1.5 mmol). The crude residue was purified by flash chromatography (petroleum ether / ethyl acetate = 10:1, *R*<sub>f</sub> = 0.30) to give the product as a yellow solid (126.0 mg, 86%, *EE/EZ* > 20:1).

**<sup>1</sup>H NMR (500 MHz, DMSO)** δ 10.11 (s, 1H), 7.60 (d, *J* = 7.4 Hz, 2H), 7.43 – 7.35 (m, 4H), 7.32 (t, *J* = 7.4 Hz, 1H), 7.20 – 7.11 (m, 2H), 7.08 – 6.99 (m, 2H), 6.37 (d, *J* = 14.9 Hz, 1H), 3.77 (s, 3H), 2.10 (s, 3H).

<sup>13</sup>C NMR (126 MHz, DMSO) δ 163.8, 157.4, 140.7, 139.0, 138.7, 136.4, 130.4, 129.0, 128.9, 127.3, 127.1, 125.7, 120.5, 111.0, 102.1, 55.2, 15.8.

HRMS (ESI) m/z: [M+H]<sup>+</sup> Calcd for C<sub>19</sub>H<sub>20</sub>NO<sub>2</sub><sup>+</sup> 294.1489; Found 294.1482.

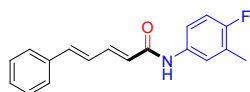

**(2E,4E)-N-(4-Fluoro-3-methylphenyl)-5-phenylpenta-2,4-dienamide (3ar)**

The title compound was prepared from (*E*)-Buta-1,3-dien-1-ylbenzene (65.1 mg, 0.5 mmol, *E:Z* > 20:1) and 1-Fluoro-2-methyl-4-nitrobenzene (232.7 mg, 1.5 mmol). The crude residue was purified by flash chromatography (petroleum ether / ethyl acetate = 10:1, R<sub>f</sub> = 0.30) to give the product as a yellow solid (96.9 mg, 69%, *EE/EZ* = 8.3:1).

<sup>1</sup>H NMR (500 MHz, DMSO) δ 10.14 (s, 1H), 7.59 (d, *J* = 7.4 Hz, 3H), 7.52 (d, *J* = 7.5 Hz, 1H), 7.43 – 7.35 (m, 3H), 7.32 (dd, *J* = 14.3, 7.1 Hz, 1H), 7.20 – 6.99 (m, 3H), 6.35 (d, *J* = 14.9 Hz, 1H), 2.22 (s, 3H).

<sup>13</sup>C NMR (126 MHz, DMSO) δ 163.3, 157.3, 155.4, 140.4, 138.7, 135.9, 128.5, 128.4, 126.8, 126.5, 124.9 (d, *J* = 7.56 Hz), 123.9 (d, *J* = 17.64 Hz), 121.7 (dd, *J* = 11.34 Hz), 118.0 (dd, *J* = 11.34 Hz), 114.7, 114.6, 14.1.

<sup>19</sup>F NMR (471 MHz, DMSO) δ -123.62 (s).

HRMS (ESI) m/z: [M+H]<sup>+</sup> Calcd for C<sub>19</sub>H<sub>17</sub>FNO<sup>+</sup> 282.1289; Found 282.1287.

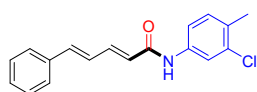

**(2E,4E)-N-(3-Chloro-4-methylphenyl)-5-phenylpenta-2,4-dienamide (3as)**

The title compound was prepared from (*E*)-Buta-1,3-dien-1-ylbenzene (65.1 mg, 0.5 mmol, *E:Z* > 20:1) and 2-Chloro-1-methyl-4-nitrobenzene (257.3 mg, 1.5 mmol). The crude residue was purified by flash chromatography (petroleum ether / ethyl acetate = 10:1, R<sub>f</sub> = 0.30) to give the product as a yellow solid (92.3 mg, 62%, *EE/EZ* = 7.3:1).

<sup>1</sup>H NMR (500 MHz, DMSO) δ 10.25 (s, 1H), 7.93 (s, 1H), 7.58 (d, *J* = 7.3 Hz, 2H), 7.45 (d, *J* = 10.1 Hz, 1H), 7.39 (dd, *J* = 16.8, 9.4 Hz, 3H), 7.32 (d, *J* = 7.3 Hz, 1H), 7.27 (d, *J* = 8.4 Hz, 1H), 7.20 – 7.08 (m, 1H), 7.04 (d, *J* = 15.6 Hz, 1H), 6.34 (d, *J* = 14.9 Hz, 1H), 2.27 (s, 3H).

<sup>13</sup>C NMR (126 MHz, DMSO) δ 163.7, 141.0, 139.1, 138.4, 136.0, 132.9, 131.0, 129.7, 128.6, 127.0, 126.6, 124.8, 119.0, 117.6, 18.8.

HRMS (ESI) m/z: [M+H]<sup>+</sup> Calcd for C<sub>18</sub>H<sub>17</sub>ClNO<sup>+</sup> 298.0993; Found 298.0991.

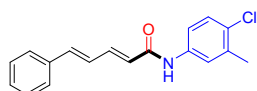

**(2E,4E)-N-(4-Chloro-3-methylphenyl)-5-phenylpenta-2,4-dienamide (3at)**

The title compound was prepared from (*E*)-Buta-1,3-dien-1-ylbenzene (65.1 mg, 0.5 mmol, *E:Z* > 20:1) and 1-Chloro-2-methyl-4-nitrobenzene (257.3 mg, 1.5 mmol). The crude residue was purified by flash chromatography (petroleum ether / ethyl acetate = 10:1, R<sub>f</sub> = 0.30) to give the product as a yellow solid (89.3 mg, 60%, *EE/EZ* = 5.7:1).

**<sup>1</sup>H NMR (500 MHz, DMSO)** δ 10.26 (s, 1H), 7.93 (s, 1H), 7.59 (d, *J* = 7.3 Hz, 2H), 7.45 (d, *J* = 8.1 Hz, 1H), 7.42 – 7.35 (m, 3H), 7.32 (t, *J* = 6.8 Hz, 1H), 7.28 (d, *J* = 8.3 Hz, 1H), 7.15 (dd, *J* = 15.5, 10.9 Hz, 1H), 7.05 (d, *J* = 15.6 Hz, 1H), 6.33 (d, *J* = 14.9 Hz, 1H), 2.27 (s, 3H).

**<sup>13</sup>C NMR (126 MHz, DMSO)** δ 164.3, 141.6, 139.7, 139.0, 136.6, 133.5, 131.7, 130.3, 129.3, 127.6, 127.2, 125.4, 119.6, 118.2, 19.4.

**HRMS (ESI) m/z:** [M+H]<sup>+</sup> Calcd for C<sub>18</sub>H<sub>17</sub>ClNO<sup>+</sup> 298.0993; Found 298.0989.

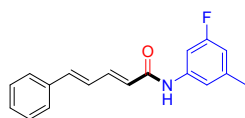

**(2E,4E)-N-(3-Fluoro-5-methylphenyl)-5-phenylpenta-2,4-dienamide (3au)**

The title compound was prepared from (*E*)-Buta-1,3-dien-1-ylbenzene (65.1 mg, 0.5 mmol, *E:Z* > 20:1) and 1-Fluoro-3-methyl-5-nitrobenzene (232.7 mg, 1.5 mmol). The crude residue was purified by flash chromatography (petroleum ether / ethyl acetate = 10:1, R<sub>f</sub> = 0.30) to give the product as a yellow solid (115.3 mg, 82%, *EE/EZ* = 14.7:1).

**<sup>1</sup>H NMR (500 MHz, DMSO)** δ 10.29 (s, 1H), 7.56 (dd, *J* = 19.4, 9.4 Hz, 3H), 7.46 – 7.26 (m, 4H), 7.19 (d, *J* = 19.6 Hz, 1H), 7.13 (d, *J* = 10.9 Hz, 1H), 7.04 (d, *J* = 15.6 Hz, 1H), 6.71 (d, *J* = 9.5 Hz, 1H), 6.36 (d, *J* = 14.9 Hz, 1H), 2.29 (s, 3H).

**<sup>13</sup>C NMR (126 MHz, DMSO)** δ 164.5, 164.4, 163.6, 161.6, 141.7, 141.2 (d, *J* = 11.34 Hz), 140.7 (d, *J* = 8.82 Hz), 139.8, 136.6, 129.2, 127.6, 127.2, 125.5, 115.8, 110.8 (d, *J* = 21.42 Hz), 103.7 (dd, *J* = 26.46 Hz), 103.5, 21.6.

**<sup>19</sup>F NMR (471 MHz, DMSO)** δ -112.91 – -113.19 (m).

**HRMS (ESI) m/z:** [M+H]<sup>+</sup> Calcd for C<sub>19</sub>H<sub>17</sub>FNO<sup>+</sup> 282.1289; Found 282.1287.

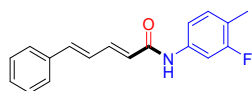

**(2E,4E)-N-(3-Fluoro-4-methylphenyl)-5-phenylpenta-2,4-dienamide (3av)**

The title compound was prepared from (*E*)-Buta-1,3-dien-1-ylbenzene (65.1 mg, 0.5 mmol, *E:Z* > 20:1) and 1-Fluoro-2-methyl-5-nitrobenzene (232.7 mg, 1.5 mmol). The crude residue was purified by flash chromatography (petroleum ether / ethyl acetate = 10:1, R<sub>f</sub> = 0.30) to give the product as a yellow solid (119.5 mg, 85%, *EE/EZ* = 9.1:1).

**<sup>1</sup>H NMR (500 MHz, DMSO)** δ 10.28 (s, 1H), 7.69 (d, *J* = 14.0 Hz, 1H), 7.58 (d, *J* = 7.4 Hz, 2H), 7.43 – 7.25 (m, 5H), 7.19 (dd, *J* = 15.2, 6.7 Hz, 1H), 7.15 – 7.10 (m, 1H), 7.04 (d, *J* = 15.6 Hz, 1H), 6.35 (d, *J* = 14.9 Hz, 1H), 2.18 (s, 3H).

**<sup>13</sup>C NMR (126 MHz, DMSO)** δ 164.2, 161.6, 159.7, 141.4, 139.5, 136.5, 131.8, 129.1, 127.5, 127.1, 125.4, 125.4, 118.8 (d, *J* = 16.38 Hz), 115.1 (d, *J* = 11.34 Hz), 106.2 (dd, *J* = 27.72 Hz), 14.0 (d, *J* = 2.52 Hz).

**<sup>19</sup>F NMR (471 MHz, DMSO)** δ -115.94 – -116.22 (m).

**HRMS (ESI) m/z:** [M+H]<sup>+</sup> Calcd for C<sub>19</sub>H<sub>17</sub>FNO<sup>+</sup> 282.1289; Found 282.1286.

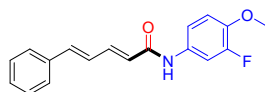

**(2E,4E)-N-(3-Fluoro-4-methoxyphenyl)-5-phenylpenta-2,4-dienamide (3aw)**

The title compound was prepared from (*E*)-Buta-1,3-dien-1-ylbenzene (65.1 mg, 0.5 mmol, *E:Z* > 20:1) and 2-Fluoro-1-methoxy-4-nitrobenzene (256.7 mg, 1.5 mmol). The crude residue was purified by flash chromatography (petroleum ether / ethyl acetate = 10:1, *R*<sub>f</sub> = 0.30) to give the product as a yellow solid (111.5 mg, 75%, *EE/EZ* = 10.3:1).

**<sup>1</sup>H NMR (500 MHz, DMSO)** δ 10.20 (s, 1H), 7.73 (d, *J* = 13.7 Hz, 1H), 7.59 (d, *J* = 7.4 Hz, 2H), 7.44 – 7.28 (m, 5H), 7.13 (dt, *J* = 9.3, 7.2 Hz, 2H), 7.03 (d, *J* = 15.6 Hz, 1H), 6.33 (d, *J* = 14.9 Hz, 1H), 3.81 (s, 3H).

**<sup>13</sup>C NMR (126 MHz, DMSO)** δ 163.6, 151.9, 149.9, 142.9 (d, *J* = 11.34 Hz), 140.8, 139.0, 136.2, 128.8, 128.8, 127.1, 126.8, 125.1 (d, *J* = 7.56 Hz), 115.1 (d, *J* = 11.34 Hz), 114.1, 107.6 (dd, *J* = 22.68 Hz), 56.1.

**<sup>19</sup>F NMR (471 MHz, DMSO)** δ -124.90 – -139.36 (m).

**HRMS (ESI) m/z:** [M+H]<sup>+</sup> Calcd for C<sub>18</sub>H<sub>17</sub>FNO<sub>2</sub><sup>+</sup> 298.1238; Found 298.1233.

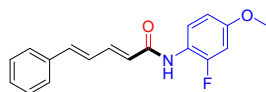

**(2E,4E)-N-(2-Fluoro-4-methoxyphenyl)-5-phenylpenta-2,4-dienamide (3ax)**

The title compound was prepared from (*E*)-Buta-1,3-dien-1-ylbenzene (65.1 mg, 0.5 mmol, *E:Z* > 20:1) and 3-Fluoro-1-methoxy-4-nitrobenzene (256.7 mg, 1.5 mmol). The crude residue was purified by flash chromatography (petroleum ether / ethyl acetate = 10:1, *R*<sub>f</sub> = 0.30) to give the product as a yellow solid (105.5 mg, 71%, *EE/EZ* > 20:1).

**<sup>1</sup>H NMR (500 MHz, DMSO)** δ 9.78 (s, 1H), 8.61 (s, 1H), 7.92 (t, *J* = 9.2 Hz, 1H), 7.59 (d, *J* = 7.5 Hz, 2H), 7.44 – 7.34 (m, 2H), 7.03 (d, *J* = 15.6 Hz, 1H), 6.94 – 6.83 (m, 2H), 6.76 (dd, *J* = 13.1, 9.1 Hz, 2H), 6.49 (d, *J* = 15.0 Hz, 1H), 3.73 (s, 3H).

**<sup>13</sup>C NMR (126 MHz, DMSO)** δ 164.4, 155.6 (d, *J* = 10.08 Hz), 154.5 (d, *J* = 11.34 Hz), 153.0 (d, *J* = 10.08 Hz), 152.6 (d, *J* = 11.34 Hz), 141.3, 139.4, 136.7, 129.3, 127.6, 127.2, 126.1, 125.4, 123.0, 120.6 (d, *J* = 12.6 Hz), 110.1, 102.2 (dd, *J* = 22.68 Hz), 56.0.

**<sup>19</sup>F NMR (471 MHz, DMSO)** δ -116.46 – -138.98 (m).

**HRMS (ESI) m/z:** [M+H]<sup>+</sup> Calcd for C<sub>18</sub>H<sub>17</sub>FNO<sub>2</sub><sup>+</sup> 298.1238; Found 298.1235.

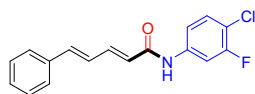

**(2E,4E)-N-(4-Chloro-3-fluorophenyl)-5-phenylpenta-2,4-dienamide (3ay)**

The title compound was prepared from (*E*)-Buta-1,3-dien-1-ylbenzene (65.1 mg, 0.5 mmol, *E:Z* > 20:1) and 1-Chloro-2-fluoro-4-nitrobenzene (263.3 mg, 1.5 mmol). The crude residue was purified by flash chromatography (petroleum ether / ethyl acetate = 10:1, *R*<sub>f</sub> = 0.30) to give the product as a yellow solid (82.7 mg, 55%, *EE/EZ* = 6.5:1).

**<sup>1</sup>H NMR (500 MHz, DMSO)** δ 10.49 (s, 1H), 7.91 (dd, *J* = 12.0, 2.3 Hz, 1H), 7.60 (d, *J* = 7.3 Hz, 2H), 7.53 (t, *J* = 8.7 Hz, 1H), 7.41 (dd, *J* = 18.4, 9.3 Hz, 4H), 7.33 (t, *J* = 7.3 Hz, 1H), 7.17 (dd, *J* = 15.5, 10.8 Hz, 1H), 7.08 (d, *J* = 15.6 Hz, 1H), 6.33 (d, *J* = 14.9 Hz, 1H).

<sup>13</sup>C NMR (126 MHz, DMSO) δ 164.4, 158.3, 156.3, 142.1, 140.0, 136.5, 130.9, 129.2, 129.2, 127.6, 127.0, 125.0 (d, *J* = 8.82 Hz), 116.4 (dd, *J* = 10.08 Hz), 113.2 (d, *J* = 15.12 Hz), 107.55 (dd, *J* = 25.2 Hz).

<sup>19</sup>F NMR (471 MHz, DMSO) δ -114.14 – -115.11 (m).

HRMS (ESI) *m/z*: [M+H]<sup>+</sup> Calcd for C<sub>18</sub>H<sub>14</sub>ClFNO<sup>+</sup> 302.0567; Found 302.0566.

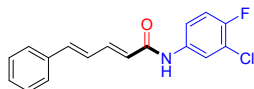

**(2*E*,4*E*)-*N*-(3-Chloro-4-fluorophenyl)-5-phenylpenta-2,4-dienamide (3az)**

The title compound was prepared from (*E*)-Buta-1,3-dien-1-ylbenzene (65.1 mg, 0.5 mmol, *E*:*Z* > 20:1) and 2-Chloro-1-fluoro-4-nitrobenzene (263.3 mg, 1.5 mmol). The crude residue was purified by flash chromatography (petroleum ether / ethyl acetate = 10:1, *R<sub>f</sub>* = 0.30) to give the product as a yellow solid (69.3 mg, 46%, *EE/EZ* = 7.2:1).

<sup>1</sup>H NMR (500 MHz, DMSO) δ 10.38 (s, 1H), 7.60 (d, *J* = 7.4 Hz, 2H), 7.54 (d, *J* = 7.0 Hz, 1H), 7.44 – 7.27 (m, 6H), 7.16 (dd, *J* = 15.5, 10.9 Hz, 1H), 7.06 (d, *J* = 15.6 Hz, 1H), 6.32 (d, *J* = 14.9 Hz, 1H).

<sup>13</sup>C NMR (126 MHz, DMSO) δ 164.2, 154.4, 152.4, 141.8, 139.8, 136.5, 129.3, 129.2, 127.5, 127.4, 127.0, 125.0 (d, *J* = 8.82 Hz), 120.8 (d, *J* = 10.08 Hz), 119.7 (dd, *J* = 11.34 Hz), 119.5 (d, *J* = 17.64 Hz), 117.3 (d, *J* = 21.42 Hz).

<sup>19</sup>F NMR (471 MHz, DMSO) δ -110.06 – -135.63 (m).

HRMS (ESI) *m/z*: [M+H]<sup>+</sup> Calcd for C<sub>18</sub>H<sub>14</sub>ClFNO<sup>+</sup> 302.0567; Found 302.0566.

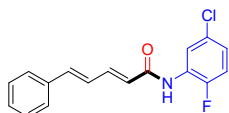

**(2*E*,4*E*)-*N*-(5-Chloro-2-fluorophenyl)-5-phenylpenta-2,4-dienamide (3aA)**

The title compound was prepared from (*E*)-Buta-1,3-dien-1-ylbenzene (65.1 mg, 0.5 mmol, *E*:*Z* > 20:1) and 4-Chloro-1-fluoro-2-nitrobenzene (263.3 mg, 1.5 mmol). The crude residue was purified by flash chromatography (petroleum ether / ethyl acetate = 10:1, *R<sub>f</sub>* = 0.30) to give the product as a yellow solid (97.8 mg, 65%, *EE/EZ* = 7.6:1).

<sup>1</sup>H NMR (500 MHz, DMSO) δ 10.13 (s, 1H), 9.32 (dd, *J* = 7.1, 2.3 Hz, 1H), 8.28 (d, *J* = 7.0 Hz, 2H), 7.60 (d, *J* = 7.4 Hz, 1H), 7.45 – 7.35 (m, 2H), 7.35 – 7.28 (m, 2H), 7.22 – 7.16 (m, 1H), 7.08 (ddd, *J* = 11.5, 6.2, 2.9 Hz, 2H), 6.58 (d, *J* = 17.8 Hz, 1H).

<sup>13</sup>C NMR (126 MHz, DMSO) δ 164.4, 151.6 (d, *J* = 10.08 Hz), 151.4 (d, *J* = 13.86 Hz), 149.5, 141.97, 139.8, 136.1, 128.8, 128.4, 128.0, 127.2, 126.6, 124.4, 122.0, 119.4, 117.0 (d, *J* = 21.42 Hz), 116.6 (d, *J* = 21.42 Hz).

<sup>19</sup>F NMR (471 MHz, DMSO) δ -117.45 – -139.66 (m).

HRMS (ESI) *m/z*: [M+H]<sup>+</sup> Calcd for C<sub>18</sub>H<sub>14</sub>ClFNO<sup>+</sup> 302.0567; Found 302.0566.

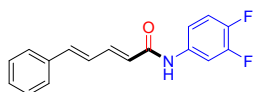

**(2*E*,4*E*)-*N*-(3,4-Difluorophenyl)-5-phenylpenta-2,4-dienamide (3aB)**

The title compound was prepared from (*E*)-Buta-1,3-dien-1-ylbenzene (65.1 mg, 0.5 mmol, *E:Z*>20:1) and 1,2-Difluoro-4-nitrobenzene (238.7 mg, 1.5 mmol). The crude residue was purified by flash chromatography (petroleum ether / ethyl acetate = 10:1, *R*<sub>f</sub> = 0.30) to give the product as a yellow solid (139.7 mg, 98%, *EE/EZ* = 8.1:1).

**<sup>1</sup>H NMR (500 MHz, DMSO)** δ 10.39 (s, 1H), 7.58 (d, *J* = 7.6 Hz, 2H), 7.45 – 7.26 (m, 7H), 7.20 – 7.09 (m, 1H), 7.04 (d, *J* = 15.6 Hz, 1H), 6.33 (d, *J* = 14.9 Hz, 1H).

**<sup>13</sup>C NMR (126 MHz, DMSO)** δ 164.0, 149.9 (d, *J* = 13.86 Hz), 148.0 (d, *J* = 13.86 Hz), 146.2 (d, *J* = 12.6 Hz), 144.3 (d, *J* = 12.6 Hz), 141.4, 139.4, 136.1, 128.8, 127.2, 126.7, 124.8, 117.5 (d, *J* = 17.64 Hz), 115.4, 108.1 (dd, *J* = 21.42 Hz).

**<sup>19</sup>F NMR (471 MHz, DMSO)** δ -131.57 – -148.50 (m).

**HRMS (ESI) m/z:** [M+H]<sup>+</sup> Calcd for C<sub>17</sub>H<sub>14</sub>F<sub>2</sub>NO<sup>+</sup> 286.0960; Found 286.0956.

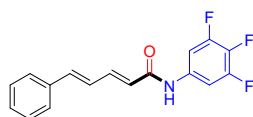

#### (2*E*,4*E*)-5-Phenyl-*N*-(3,4,5-trifluorophenyl)penta-2,4-dienamide (3aC)

The title compound was prepared from (*E*)-Buta-1,3-dien-1-ylbenzene (65.1 mg, 0.5 mmol, *E:Z*>20:1) and 1,2,3-Trifluoro-5-nitrobenzene (265.7 mg, 1.5 mmol). The crude residue was purified by flash chromatography (petroleum ether / ethyl acetate = 10:1, *R*<sub>f</sub> = 0.30) to give the product as a yellow solid (144.1 mg, 95%, *EE/EZ* = 3.2:1).

**<sup>1</sup>H NMR (500 MHz, DMSO)** δ 10.49 (s, 1H), 7.64 – 7.52 (m, 4H), 7.44 – 7.32 (m, 4H), 7.20 – 7.10 (m, 1H), 7.07 (d, *J* = 15.6 Hz, 1H), 6.27 (d, *J* = 14.9 Hz, 1H).

**<sup>13</sup>C NMR (126 MHz, DMSO)** δ 164.3, 142.9, 142.1, 140.0, 136.2, 128.9, 127.3, 127.2, 126.7, 125.0, 124.3 (d, *J* = 10.08 Hz), 103.6, 103.4.

**<sup>19</sup>F NMR (471 MHz, DMSO)** δ -129.54 – -141.03 (m).

**HRMS (ESI) m/z:** [M+H]<sup>+</sup> Calcd for C<sub>17</sub>H<sub>13</sub>F<sub>3</sub>NO<sup>+</sup> 304.0865; Found 304.0864.

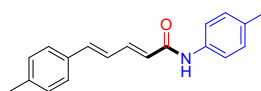

#### (2*E*,4*E*)-*N*,5-di-*p*-tolylpenta-2,4-dienamide (3bb)

The title compound was prepared from (*E*)-1-(Buta-1,3-dien-1-yl)-4-methylbenzene (72.1 mg, 0.5 mmol, *E:Z*>20:1) and 1-Methyl-4-nitrobenzene (205.5 mg, 1.5 mmol). The crude residue was purified by flash chromatography (petroleum ether / ethyl acetate = 4:1, *R*<sub>f</sub> = 0.30) to give the product as a yellow solid (109.5 mg, 79%, *EE/EZ* = 9.3:1).

**<sup>1</sup>H NMR (500 MHz, DMSO)** δ 10.06 (s, 1H), 7.58 (d, *J* = 8.4 Hz, 2H), 7.49 (d, *J* = 8.1 Hz, 2H), 7.34 (dd, *J* = 14.9, 10.7 Hz, 1H), 7.20 (d, *J* = 8.0 Hz, 2H), 7.12 (d, *J* = 8.4 Hz, 2H), 7.06 (d, *J* = 10.8 Hz, 1H), 6.99 (d, *J* = 15.6 Hz, 1H), 6.32 (d, *J* = 14.9 Hz, 1H), 2.32 (s, 3H), 2.26 (s, 3H).

**<sup>13</sup>C NMR (126 MHz, DMSO)** δ 164.0, 141.2, 139.3, 138.8, 137.3, 137.3, 134.0, 132.6, 129.9, 129.6, 127.5, 126.3, 125.3, 119.6, 21.4, 21.0.

**HRMS (ESI) m/z:** [M+H]<sup>+</sup> Calcd for C<sub>19</sub>H<sub>20</sub>NO<sup>+</sup> 278.1539; Found 278.1535.

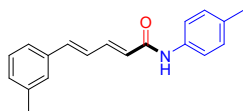

**(2E,4E)-5-(*m*-Tolyl)-*N*-(*p*-tolyl)penta-2,4-dienamide (3cb)**

The title compound was prepared from 1-(Buta-1,3-dien-1-yl)-3-methylbenzene (72.1 mg, 0.5 mmol, *E:Z*=1:1.4) and 1-Methyl-4-nitrobenzene (205.5 mg, 1.5 mmol). The crude residue was purified by flash chromatography (petroleum ether / ethyl acetate = 4:1, *R<sub>f</sub>* = 0.30) to give the product as a yellow solid (95.6 mg, 69%, *EE/EZ* = 14.7:1).

**<sup>1</sup>H NMR (500 MHz, DMSO)** δ 10.07 (s, 1H), 7.59 (d, *J* = 8.2 Hz, 2H), 7.43 – 7.30 (m, 3H), 7.26 (t, *J* = 7.5 Hz, 1H), 7.12 (d, *J* = 8.2 Hz, 4H), 6.98 (d, *J* = 15.6 Hz, 1H), 6.35 (d, *J* = 14.9 Hz, 1H), 2.31 (s, 3H), 2.25 (s, 3H).

**<sup>13</sup>C NMR (126 MHz, DMSO)** δ 163.4, 140.4, 138.8, 137.8, 136.7, 136.0, 132.0, 129.2, 129.0, 128.5, 127.5, 126.5, 125.2, 124.2, 119.0, 119.0, 20.8, 20.3.

**HRMS (ESI) *m/z*:** [*M*+*H*]<sup>+</sup> Calcd for C<sub>19</sub>H<sub>20</sub>NO<sup>+</sup> 278.1539; Found 278.1537.

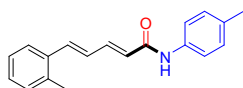

**(2E,4E)-5-(*o*-Tolyl)-*N*-(*p*-tolyl)penta-2,4-dienamide (3db)**

The title compound was prepared from 1-(Buta-1,3-dien-1-yl)-2-methylbenzene (72.1 mg, 0.5 mmol, *E:Z*=1:1) and 1-Methyl-4-nitrobenzene (205.5 mg, 1.5 mmol). The crude residue was purified by flash chromatography (petroleum ether / ethyl acetate = 4:1, *R<sub>f</sub>* = 0.30) to give the product as a yellow solid (76.2 mg, 55%, *EE/EZ* = 15.6:1).

**<sup>1</sup>H NMR (500 MHz, DMSO)** δ 10.08 (s, 1H), 7.68 (dd, *J* = 6.4, 3.1 Hz, 1H), 7.60 (d, *J* = 8.3 Hz, 2H), 7.45 (dd, *J* = 14.9, 11.1 Hz, 1H), 7.26 (d, *J* = 15.4 Hz, 1H), 7.20 (d, *J* = 3.1 Hz, 3H), 7.12 (d, *J* = 8.3 Hz, 2H), 7.03 (dd, *J* = 15.4, 11.1 Hz, 1H), 6.37 (d, *J* = 15.0 Hz, 1H), 2.36 (s, 3H), 2.26 (s, 3H).

**<sup>13</sup>C NMR (126 MHz, DMSO)** δ 164.1, 141.4, 137.4, 136.7, 136.6, 135.3, 132.6, 131.0, 129.6, 129.0, 128.2, 126.7, 125.8, 119.7, 21.0, 19.8.

**HRMS (ESI) *m/z*:** [*M*+*H*]<sup>+</sup> Calcd for C<sub>19</sub>H<sub>20</sub>NO<sup>+</sup> 278.1539; Found 278.1536.

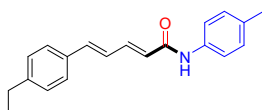

**(2E,4E)-5-(4-Ethylphenyl)-*N*-(*p*-tolyl)penta-2,4-dienamide (3eb)**

The title compound was prepared from 1-(Buta-1,3-dien-1-yl)-4-ethylbenzene (79.1 mg, 0.5 mmol, *E:Z*=1:1.4) and 1-Methyl-4-nitrobenzene (205.5 mg, 1.5 mmol). The crude residue was purified by flash chromatography (petroleum ether / ethyl acetate = 4:1, *R<sub>f</sub>* = 0.30) to give the product as a yellow solid (106.3 mg, 73%, *EE/EZ* = 12.5:1).

**<sup>1</sup>H NMR (500 MHz, DMSO)** δ 10.06 (s, 1H), 7.59 (d, *J* = 8.3 Hz, 2H), 7.50 (d, *J* = 8.1 Hz, 2H), 7.35 (dd, *J* = 14.9, 10.7 Hz, 1H), 7.22 (d, *J* = 8.1 Hz, 2H), 7.12 (d, *J* = 8.4 Hz, 2H), 7.06 (d, *J* = 10.7 Hz, 1H), 6.99 (d, *J* = 15.6 Hz, 1H), 6.34 (d, *J* = 14.9 Hz, 1H), 2.61 (q, *J* = 7.6 Hz, 2H), 2.26 (s, 3H), 1.18 (t, *J* = 7.6 Hz, 3H).



<sup>13</sup>C NMR (126 MHz, DMSO) δ 164.1, 145.2, 141.2, 139.3, 137.4, 134.2, 132.6, 129.6, 128.7, 127.6, 126.4, 125.4, 119.6, 119.6, 28.5, 21.0, 15.9.

HRMS (ESI) m/z: [M+H]<sup>+</sup> Calcd for C<sub>20</sub>H<sub>22</sub>NO<sup>+</sup> 292.1696; Found 292.1692.

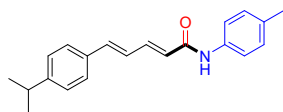

**(2E,4E)-5-(4-Isopropylphenyl)-N-(p-tolyl)penta-2,4-dienamide (3fb)**

The title compound was prepared from 1-(Buta-1,3-dien-1-yl)-4-isopropylbenzene (86.2 mg, 0.5 mmol, *E:Z*=1:1.5) and 1-Methyl-4-nitrobenzene (205.5 mg, 1.5 mmol). The crude residue was purified by flash chromatography (petroleum ether / ethyl acetate = 4:1, R<sub>f</sub> = 0.30) to give the product as a yellow solid (126.7 mg, 83%, *EE/EZ* = 14.3:1).

<sup>1</sup>H NMR (500 MHz, DMSO) δ 10.09 (s, 1H), 7.62 (d, *J* = 8.4 Hz, 2H), 7.55 (d, *J* = 8.2 Hz, 2H), 7.39 (dd, *J* = 14.9, 10.7 Hz, 1H), 7.29 (d, *J* = 8.3 Hz, 2H), 7.16 (d, *J* = 8.3 Hz, 2H), 7.09 (d, *J* = 10.7 Hz, 1H), 7.03 (d, *J* = 15.6 Hz, 1H), 6.37 (d, *J* = 14.9 Hz, 1H), 3.01 – 2.78 (m, 1H), 2.30 (s, 3H), 1.24 (d, *J* = 6.9 Hz, 6H).

<sup>13</sup>C NMR (126 MHz, DMSO) δ 164.1, 149.7, 141.2, 139.3, 137.4, 134.4, 132.6, 129.6, 127.6, 127.2, 126.4, 125.4, 119.6, 119.5, 33.8, 24.2, 21.0.

HRMS (ESI) m/z: [M+H]<sup>+</sup> Calcd for C<sub>21</sub>H<sub>24</sub>NO<sup>+</sup> 306.1852; Found 306.1849.

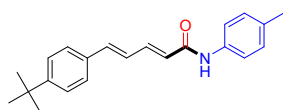

**(2E,4E)-5-(4-(Tert-butyl)phenyl)-N-(p-tolyl)penta-2,4-dienamide (3gb)**

The title compound was prepared from 1-(Buta-1,3-dien-1-yl)-4-(tert-butyl)benzene (93.2 mg, 0.5 mmol, *E:Z*=1:1.5) and 1-Methyl-4-nitrobenzene (205.5 mg, 1.5 mmol). The crude residue was purified by flash chromatography (petroleum ether / ethyl acetate = 4:1, R<sub>f</sub> = 0.30) to give the product as a yellow solid (83.1 mg, 52%, *EE/EZ* = 15.3:1).

<sup>1</sup>H NMR (500 MHz, DMSO) δ 10.05 (s, 1H), 7.59 (d, *J* = 7.1 Hz, 2H), 7.51 (d, *J* = 8.4 Hz, 2H), 7.38 (ddd, *J* = 28.8, 17.9, 10.8 Hz, 3H), 7.12 (d, *J* = 8.3 Hz, 2H), 7.05 (d, *J* = 10.7 Hz, 1H), 6.99 (d, *J* = 15.6 Hz, 1H), 6.34 (d, *J* = 14.9 Hz, 1H), 2.26 (s, 3H), 1.28 (s, 9H).

<sup>13</sup>C NMR (126 MHz, DMSO) δ 163.8, 151.6, 140.8, 138.9, 137.1, 133.7, 132.3, 129.3, 127.1, 126.2, 125.7, 119.4, 34.6, 31.2, 20.7.

HRMS (ESI) m/z: [M+H]<sup>+</sup> Calcd for C<sub>22</sub>H<sub>26</sub>NO<sup>+</sup> 320.2009; Found 320.2006.

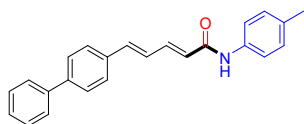

**(2E,4E)-5-([1,1'-Biphenyl]-4-yl)-N-(p-tolyl)penta-2,4-dienamide (3hb)**

The title compound was prepared from 1-(Buta-1,3-dien-1-yl)-4-phenoxybenzene (102.6 mg, 0.5 mmol, *E:Z*=1:2.5) and 1-Methyl-4-nitrobenzene (205.5 mg, 1.5 mmol). The crude residue was purified by flash chromatography (petroleum ether / ethyl acetate = 4:1, R<sub>f</sub> = 0.30) to give the product as a white solid (95.0 mg, 56%, *EE/EZ* = 15.1:1).

**<sup>1</sup>H NMR (500 MHz, DMSO)** δ 10.09 (s, 1H), 8.49 (s, 1H), 7.71 (t, *J* = 5.5 Hz, 4H), 7.58 (d, *J* = 8.3 Hz, 2H), 7.48 (t, *J* = 7.7 Hz, 2H), 7.43 – 7.28 (m, 3H), 7.19 (dd, *J* = 15.5, 11.0 Hz, 1H), 7.15 – 7.03 (m, 3H), 6.37 (d, *J* = 14.9 Hz, 1H), 2.26 (s, 3H).

**<sup>13</sup>C NMR (126 MHz, DMSO)** δ 152.7, 140.6, 140.2, 139.5, 138.4, 137.2, 137.1, 135.4, 130.5, 129.2, 129.0, 127.8, 127.0, 126.6, 119.2, 118.2, 118.1, 20.4.

**HRMS (ESI) m/z:** [M+H]<sup>+</sup> Calcd for C<sub>24</sub>H<sub>22</sub>NO<sup>+</sup> 340.1696; Found 340.1692.

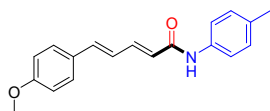

**(2E,4E)-5-(4-Methoxyphenyl)-N-(p-tolyl)penta-2,4-dienamide (3ib)**

The title compound was prepared from 1-(Buta-1,3-dien-1-yl)-4-methoxybenzene (80.1 mg, 0.5 mmol, *E:Z=1:1.3*) and 1-Methyl-4-nitrobenzene (205.5 mg, 1.5 mmol). The crude residue was purified by flash chromatography (petroleum ether / ethyl acetate = 4:1, R<sub>f</sub> = 0.30) to give the product as a yellow solid (133.9 mg, 92%, *EE/EZ > 20:1*).

**<sup>1</sup>H NMR (500 MHz, DMSO)** δ 8.50 (s, 1H), 7.56 (dd, *J* = 22.8, 8.5 Hz, 2H), 7.33 (d, *J* = 8.3 Hz, 3H), 7.10 (dd, *J* = 21.9, 8.3 Hz, 4H), 6.96 (dd, *J* = 14.4, 8.0 Hz, 2H), 6.29 (d, *J* = 14.9 Hz, 1H), 3.78 (s, 3H), 2.24 (s, 3H).

**<sup>13</sup>C NMR (126 MHz, DMSO)** δ 164.3, 160.3, 153.2, 141.5, 139.2, 137.8, 131.0, 129.7, 129.2, 125.1, 119.7, 118.7, 118.6, 114.8, 55.7, 20.7.

**HRMS (ESI) m/z:** [M+H]<sup>+</sup> Calcd for C<sub>19</sub>H<sub>20</sub>NO<sub>2</sub><sup>+</sup> 294.1489; Found 294.1484.

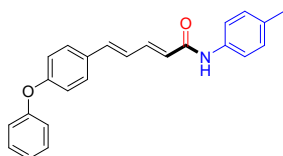

**(2E,4E)-5-(4-Phenoxyphenyl)-N-(p-tolyl)penta-2,4-dienamide (3jb)**

The compound was from 1-(Buta-1,3-dien-1-yl)-4-phenoxybenzene (111.1 mg, 0.5 mmol, *E:Z=1:2.3*) and 1-methyl-4-nitrobenzene (205.5 mg, 1.5 mmol). The crude residue was purified by flash chromatography (petroleum ether / ethyl acetate = 4:1, R<sub>f</sub> = 0.30) to give the product as a yellow solid (126.1 mg, 71%, *EE/EZ = 7.0:1*).

**<sup>1</sup>H NMR (500 MHz, DMSO)** δ 10.05 (s, 1H), 7.59 (dd, *J* = 17.4, 8.4 Hz, 4H), 7.42 (t, *J* = 7.9 Hz, 2H), 7.34 (dd, *J* = 15.0, 9.4 Hz, 1H), 7.18 (t, *J* = 7.4 Hz, 1H), 7.12 (d, *J* = 8.3 Hz, 2H), 7.08 – 6.95 (m, 6H), 6.33 (d, *J* = 14.9 Hz, 1H), 2.24 (d, *J* = 10.6 Hz, 3H).

**<sup>13</sup>C NMR (126 MHz, DMSO)** δ 164.1, 157.7, 156.6, 141.1, 138.6, 137.3, 132.6, 132.0, 130.6, 129.6, 129.4, 126.4, 125.4, 124.4, 119.6, 119.5, 119.0, 21.0.

**HRMS (ESI) m/z:** [M+H]<sup>+</sup> Calcd for C<sub>24</sub>H<sub>22</sub>NO<sub>2</sub><sup>+</sup> 356.1645; Found 356.1640.

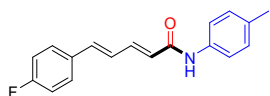

**(2E,4E)-5-(4-Fluorophenyl)-N-(p-tolyl)penta-2,4-dienamide (3kb)**

The compound was from (*E*)-1-(Buta-1,3-dien-1-yl)-4-fluorobenzene (74.1 mg, 0.5 mmol, *E:Z > 20:1*) and 1-Methyl-4-nitrobenzene (205.5 mg, 1.5 mmol). The crude residue was purified by

flash chromatography (petroleum ether / ethyl acetate = 4:1, R<sub>f</sub> = 0.30) to give the product as a yellow solid (102.7 mg, 73%, *EE/EZ* = 17.5:1).

**<sup>1</sup>H NMR (500 MHz, DMSO)** δ 10.08 (s, 1H), 7.72 – 7.52 (m, 4H), 7.34 (dd, *J* = 14.9, 10.5 Hz, 1H), 7.22 (t, *J* = 8.8 Hz, 2H), 7.15 – 6.98 (m, 4H), 6.35 (d, *J* = 14.9 Hz, 1H), 2.26 (s, 3H).

**<sup>13</sup>C NMR (126 MHz, DMSO)** δ 163.9, 161.6, 140.8, 137.9, 137.2, 133.2, 132.5, 129.5, 129.5, 129.5, 127.1, 125.8, 119.5, 116.1 (d, *J* = 21.42 Hz), 20.8.

**<sup>19</sup>F NMR (471 MHz, DMSO)** δ -110.06 – -114.10 (m).

**HRMS (ESI) m/z:** [M+H]<sup>+</sup> Calcd for C<sub>18</sub>H<sub>17</sub>FNO<sup>+</sup> 282.1289; Found 282.1286.

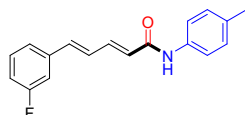

**(2*E*,4*E*)-5-(3-Fluorophenyl)-*N*-(*p*-tolyl)penta-2,4-dienamide (3lb)**

The compound was from 1-(Buta-1,3-dien-1-yl)-3-fluorobenzene (74.1 mg, 0.5 mmol, *E:Z* = 1:1.5) and 1-Methyl-4-nitrobenzene (205.5 mg, 1.5 mmol). The crude residue was purified by flash chromatography (petroleum ether / ethyl acetate = 4:1, R<sub>f</sub> = 0.30) to give the product as a yellow solid (106.9 mg, 76%, *EE/EZ* = 16.7:1).

**<sup>1</sup>H NMR (500 MHz, DMSO)** δ 10.12 (s, 1H), 7.59 (d, *J* = 8.3 Hz, 2H), 7.48 (d, *J* = 11.7 Hz, 1H), 7.38 (ddd, *J* = 25.9, 15.1, 9.4 Hz, 3H), 7.20 (dd, *J* = 15.5, 11.1 Hz, 1H), 7.12 (d, *J* = 8.4 Hz, 3H), 7.02 (d, *J* = 15.5 Hz, 1H), 6.40 (d, *J* = 14.9 Hz, 1H), 2.25 (s, 3H).

**<sup>13</sup>C NMR (126 MHz, DMSO)** δ 163.4, 161.6, 140.1, 138.9 (d, *J* = 8.82 Hz), 137.3, 136.8, 132.3, 130.7 (d, *J* = 8.82 Hz), 129.2, 128.4, 126.4, 123.6, 119.2, 119.2, 115.3 (d, *J* = 21.42 Hz), 113.0 (d, *J* = 21.42 Hz), 20.5.

**<sup>19</sup>F NMR (471 MHz, DMSO)** δ -112.87 – -113.28 (m).

**HRMS (ESI) m/z:** [M+H]<sup>+</sup> Calcd for C<sub>18</sub>H<sub>17</sub>FNO<sup>+</sup> 282.1289; Found 282.1286.

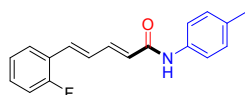

**(2*E*,4*E*)-5-(2-Fluorophenyl)-*N*-(*p*-tolyl)penta-2,4-dienamide (3mb)**

The compound was from 1-(Buta-1,3-dien-1-yl)-2-fluorobenzene (74.1 mg, 0.5 mmol, *E:Z* = 1:1.4) and 1-Methyl-4-nitrobenzene (205.5 mg, 1.5 mmol). The crude residue was purified by flash chromatography (petroleum ether / ethyl acetate = 4:1, R<sub>f</sub> = 0.30) to give the product as a yellow solid (108.3 mg, 77%, *EE/EZ* > 20:1).

**<sup>1</sup>H NMR (500 MHz, DMSO)** δ 10.10 (s, 1H), 7.78 (t, *J* = 7.2 Hz, 1H), 7.59 (d, *J* = 8.3 Hz, 2H), 7.38 (dt, *J* = 12.3, 8.9 Hz, 2H), 7.30 – 7.05 (m, 6H), 6.40 (d, *J* = 14.9 Hz, 1H), 2.26 (s, 3H).

**<sup>13</sup>C NMR (126 MHz, DMSO)** δ 163.7, 161.2, 159.2, 140.7, 137.1, 132.6, 130.8 (d, *J* = 8.82 Hz), 130.6, 129.8 (d, *J* = 5.04 Hz), 129.5, 128.3 (d, *J* = 2.52 Hz), 126.9 (d, *J* = 27.56 Hz), 125.2 (d, *J* = 2.52

Hz), 124.2 (d, *J* = 12.6 Hz), 119.6, 116.3 (d, *J* = 21.42 Hz), 20.8.

**<sup>19</sup>F NMR (471 MHz, DMSO)** δ -113.41 – -120.18 (m).

**HRMS (ESI) m/z:** [M+H]<sup>+</sup> Calcd for C<sub>18</sub>H<sub>17</sub>FNO<sup>+</sup> 282.1289; Found 282.1286.

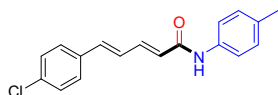

**(2E,4E)-5-(4-Chlorophenyl)-N-(p-tolyl)penta-2,4-dienamide (3nb)**

The compound was from (*E*)-1-(Buta-1,3-dien-1-yl)-4-chlorobenzene (82.3 mg, 0.5 mmol, *E:Z* > 20:1) and 1-Methyl-4-nitrobenzene (205.5 mg, 1.5 mmol). The crude residue was purified by flash chromatography (petroleum ether / ethyl acetate = 4:1, *R<sub>f</sub>* = 0.30) to give the product as a yellow solid (77.2 mg, 52%, *EE/EZ* = 1.4:1).

**<sup>1</sup>H NMR (500 MHz, DMSO)** δ 10.09 (s, 1H), 7.70 – 7.51 (m, 3H), 7.49 – 7.39 (m, 1H), 7.34 (dd, *J* = 15.1, 10.8 Hz, 1H), 7.12 (d, *J* = 7.8 Hz, 2H), 7.03 (d, *J* = 15.5 Hz, 1H), 6.89 (d, *J* = 15.9 Hz, 1H), 6.73 (t, *J* = 11.2 Hz, 1H), 6.37 (d, *J* = 14.9 Hz, 1H), 6.01 (d, *J* = 11.2 Hz, 1H), 2.26 (s, 3H).

**<sup>13</sup>C NMR (126 MHz, DMSO)** δ 164.5, 163.9, 141.3, 140.7, 138.2, 137.8, 135.8, 133.5, 132.7, 129.6, 129.4, 129.3, 129.1, 128.2, 126.5, 122.5, 119.6, 21.0.

**HRMS (ESI) m/z:** [M+H]<sup>+</sup> Calcd for C<sub>18</sub>H<sub>17</sub>ClNO<sup>+</sup> 298.0993; Found 298.0989.

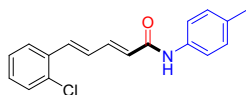

**(2E,4E)-5-(2-Chlorophenyl)-N-(p-tolyl)penta-2,4-dienamide (3ob)**

The compound was from (*E*)-1-(Buta-1,3-dien-1-yl)-2-chlorobenzene (82.3 mg, 0.5 mmol, *E:Z* > 20:1) and 1-Methyl-4-nitrobenzene (205.5 mg, 1.5 mmol). The crude residue was purified by flash chromatography (petroleum ether / ethyl acetate = 4:1, *R<sub>f</sub>* = 0.30) to give the product as a yellow solid (87.6 mg, 59%, *EE/EZ* > 20:1).

**<sup>1</sup>H NMR (500 MHz, DMSO)** δ 10.13 (s, 1H), 7.89 (d, *J* = 7.5 Hz, 1H), 7.59 (d, *J* = 8.1 Hz, 2H), 7.49 (d, *J* = 9.0 Hz, 1H), 7.38 (ddd, *J* = 24.1, 15.8, 9.9 Hz, 3H), 7.28 (d, *J* = 15.5 Hz, 1H), 7.19 (dd, *J* = 15.5, 10.8 Hz, 1H), 7.12 (d, *J* = 8.3 Hz, 2H), 6.42 (d, *J* = 14.9 Hz, 1H), 2.26 (s, 3H).

**<sup>13</sup>C NMR (126 MHz, DMSO)** δ 163.2, 139.8, 136.6, 133.7, 133.2, 132.4, 132.1, 129.9, 129.7, 129.0, 127.4, 127.1, 126.8, 119.1, 119.0, 20.3.

**HRMS (ESI) m/z:** [M+H]<sup>+</sup> Calcd for C<sub>18</sub>H<sub>17</sub>ClNO<sup>+</sup> 298.0993; Found 298.0991.

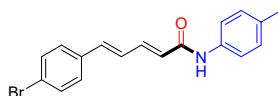

**(2E,4E)-5-(4-Bromophenyl)-N-(p-tolyl)penta-2,4-dienamide (3pb)**

The compound was from (*E*)-1-Bromo-4-(buta-1,3-dien-1-yl)benzene (104.1 mg, 0.5 mmol, *E:Z* > 20:1) and 1-Methyl-4-nitrobenzene (205.5 mg, 1.5 mmol). The crude residue was purified by flash chromatography (petroleum ether / ethyl acetate = 4:1, *R<sub>f</sub>* = 0.30) to give the product as a yellow solid (90.5 mg, 53%, *EE/EZ* = 3.3:1).

**<sup>1</sup>H NMR (500 MHz, DMSO)** δ 10.11 (s, 1H), 7.57 (q, *J* = 8.9 Hz, 5H), 7.33 (d, *J* = 8.5 Hz, 2H), 7.19 (d, *J* = 15.5 Hz, 1H), 7.13 (d, *J* = 8.3 Hz, 1H), 7.07 (d, *J* = 8.3 Hz, 1H), 7.01 (d, *J* = 15.5 Hz, 1H), 6.38 (d, *J* = 14.9 Hz, 1H), 2.26 (s, 3H).

**<sup>13</sup>C NMR (126 MHz, DMSO)** δ 163.2, 140.1, 137.3, 137.1, 136.7, 135.4, 132.1, 131.6, 130.3, 129.0, 128.9, 127.6, 125.9, 121.6, 119.0, 118.0, 20.2.

**HRMS (ESI) m/z:** [M+H]<sup>+</sup> Calcd for C<sub>18</sub>H<sub>17</sub>BrNO<sup>+</sup> 342.0488; Found 342.0483.

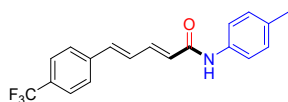

**(2E,4E)-N-(p-Tolyl)-5-(4-(trifluoromethyl)phenyl)penta-2,4-dienamide (3qb)**

The compound was from 1-(Buta-1,3-dien-1-yl)-4-(trifluoromethyl)benzene (99.1 mg, 0.5 mmol, *E:Z*=1:1.5) and 1-Methyl-4-nitrobenzene (205.5 mg, 1.5 mmol). The crude residue was purified by flash chromatography (petroleum ether / ethyl acetate = 4:1, *R<sub>f</sub>* = 0.30) to give the product as a yellow solid (149.1 mg, 90%, *EE/EZ* = 14.7:1).

**<sup>1</sup>H NMR (500 MHz, DMSO)** δ 10.09 (s, 1H), 7.57 (d, *J* = 8.2 Hz, 2H), 7.43 (d, *J* = 11.4 Hz, 1H), 7.37 – 7.23 (m, 3H), 7.21 – 7.06 (m, 4H), 6.98 (d, *J* = 15.5 Hz, 1H), 6.35 (d, *J* = 14.9 Hz, 1H), 2.26 (s, 3H).

**<sup>13</sup>C NMR (126 MHz, DMSO)** δ 163.5, 161.9, 160.0, 140.3, 137.6, 136.8, 136.3, 132.2, 131.9, 129.2, 127.4, 125.8, 124.7, 123.4, 119.2, 119.1, 112.7 (d, *J* = 22.68 Hz), 20.5, 14.1.

**<sup>19</sup>F NMR (471 MHz, DMSO)** δ -111.05 – -125.21 (m).

**HRMS (ESI) m/z:** [M+H]<sup>+</sup> Calcd for C<sub>19</sub>H<sub>17</sub>F<sub>3</sub>NO<sup>+</sup> 332.1257; Found 332.1251.

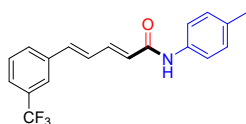

**(2E,4E)-N-(p-Tolyl)-5-(3-(trifluoromethyl)phenyl)penta-2,4-dienamide (3rb)**

The compound was from 1-(Buta-1,3-dien-1-yl)-3-(trifluoromethyl)benzene (99.1 mg, 0.5 mmol, *E:Z*>20:1) and 1-Methyl-4-nitrobenzene (205.5 mg, 1.5 mmol). The crude residue was purified by flash chromatography (petroleum ether / ethyl acetate = 4:1, *R<sub>f</sub>* = 0.30) to give the product as a yellow solid (109.3 mg, 66%, *EE/EZ* = 12.5:1).

**<sup>1</sup>H NMR (500 MHz, DMSO)** δ 10.14 (s, 1H), 7.96 – 7.85 (m, 2H), 7.67 – 7.54 (m, 4H), 7.45 – 7.24 (m, 2H), 7.11 (dd, *J* = 11.7, 7.4 Hz, 3H), 6.44 (d, *J* = 14.4 Hz, 1H), 2.25 (s, 3H).

**<sup>13</sup>C NMR (126 MHz, DMSO)** δ 163.7, 140.4, 137.7, 137.2, 132.6, 131.0, 130.1, 129.5, 129.2, 127.1 (d, *J* = 7.56 Hz), 125.6, 125.1 (d, *J* = 3.78 Hz), 123.9 (d, *J* = 3.78 Hz), 119.6 (d, *J* = 11.34 Hz), 20.8.

**<sup>19</sup>F NMR (471 MHz, DMSO)** δ -56.88 – -63.27 (m).

**HRMS (ESI) m/z:** [M+H]<sup>+</sup> Calcd for C<sub>19</sub>H<sub>17</sub>F<sub>3</sub>NO<sup>+</sup> 332.1257; Found 332.1253.

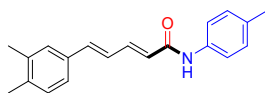

**(2E,4E)-5-(3,4-Dimethylphenyl)-N-(p-tolyl)penta-2,4-dienamide (3sb)**

The compound was from 4-(Buta-1,3-dien-1-yl)-1,2-dimethylbenzene (79.1 mg, 0.5 mmol, *E:Z*=1:1.4) and 1-Methyl-4-nitrobenzene (205.5 mg, 1.5 mmol). The crude residue was purified by flash chromatography (petroleum ether / ethyl acetate = 4:1, *R<sub>f</sub>* = 0.30) to give the product as a yellow solid (119.3 mg, 82%, *EE/EZ* > 20:1).

**<sup>1</sup>H NMR (500 MHz, DMSO)** δ 10.04 (s, 1H), 7.58 (d, *J* = 7.1 Hz, 2H), 7.44 – 7.26 (m, 3H), 7.13 (dd, *J* = 11.2, 8.2 Hz, 3H), 7.06 (dd, *J* = 15.5, 10.9 Hz, 1H), 6.95 (d, *J* = 15.6 Hz, 1H), 6.31 (d, *J* = 14.9 Hz, 1H), 2.26 (s, 3H), 2.23 (s, 3H), 2.22 (s, 3H).

<sup>13</sup>C NMR (126 MHz, DMSO) δ 164.0, 141.1, 139.4, 137.6, 137.2, 137.0, 134.2, 132.5, 130.3, 129.5, 128.5, 126.0, 125.0, 119.5, 20.8, 19.7, 19.7.

HRMS (ESI) m/z: [M+H]<sup>+</sup> Calcd for C<sub>20</sub>H<sub>22</sub>NO<sup>+</sup> 292.1696; Found 292.1692.

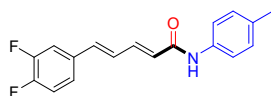

**(2E,4E)-5-(3,4-Difluorophenyl)-N-(p-tolyl)penta-2,4-dienamide (3tb)**

The compound was from 4-(Buta-1,3-dien-1-yl)-1,2-difluorobenzene (83.1 mg, 0.5 mmol, *E:Z=1:1*) and 1-Methyl-4-nitrobenzene (205.5 mg, 1.5 mmol). The crude residue was purified by flash chromatography (petroleum ether / ethyl acetate = 4:1, R<sub>f</sub> = 0.30) to give the product as a yellow solid (139.2 mg, 93%, *EE/EZ = 4.5:1*).

<sup>1</sup>H NMR (500 MHz, DMSO) δ 10.11 (s, 1H), 7.59 (d, *J* = 8.2 Hz, 3H), 7.37 – 7.30 (m, 3H), 7.12 (d, *J* = 8.1 Hz, 3H), 6.98 (d, *J* = 15.5 Hz, 1H), 6.38 (d, *J* = 14.9 Hz, 1H), 2.23 (s, 3H).

<sup>13</sup>C NMR (126 MHz, DMSO) δ 163.8, 140.4, 137.7, 136.9, 132.7, 131.0, 129.6, 128.7, 126.8, 125.0, 119.7, 118.7, 118.2 (d, *J* = 16.38 Hz), 115.7 (d, *J* = 17.64 Hz), 20.8.

<sup>19</sup>F NMR (471 MHz, DMSO) δ -128.25 – -144.08 (m).

HRMS (ESI) m/z: [M+H]<sup>+</sup> Calcd for C<sub>18</sub>H<sub>16</sub>F<sub>2</sub>NO<sup>+</sup> 300.1194; Found 300.1192.

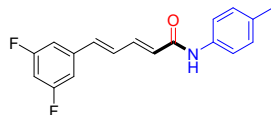

**(2E,4E)-5-(3,5-Difluorophenyl)-N-(p-tolyl)penta-2,4-dienamide (3ub)**

The compound was from 4-(Buta-1,3-dien-1-yl)-1,3-difluorobenzene (83.1 mg, 0.5 mmol, *E:Z=1:1.3*) and 1-Methyl-4-nitrobenzene (205.5 mg, 1.5 mmol). The crude residue was purified by flash chromatography (petroleum ether / ethyl acetate = 4:1, R<sub>f</sub> = 0.30) to give the product as a yellow solid (127.2 mg, 85%, *EE/EZ > 20:1*).

<sup>1</sup>H NMR (500 MHz, DMSO) δ 10.09 (s, 1H), 7.85 (dd, *J* = 15.5, 8.7 Hz, 1H), 7.58 (d, *J* = 8.3 Hz, 2H), 7.47 – 7.23 (m, 2H), 7.21 – 6.97 (m, 5H), 6.38 (d, *J* = 14.9 Hz, 1H), 2.25 (s, 3H).

<sup>13</sup>C NMR (126 MHz, DMSO) δ 163.8, 161.6 (d, *J* = 12.6 Hz), 161.4 (d, *J* = 12.6 Hz), 159.4 (d, *J* = 12.6 Hz), 140.7, 137.3, 132.7, 129.8, 129.6, 127.0, 119.7, 112.7 (d, *J* = 21.42 Hz), 104.9 (t, *J* = 15.12 Hz), 21.0.

<sup>19</sup>F NMR (471 MHz, DMSO) δ -104.97 – -114.78 (m).

HRMS (ESI) m/z: [M+H]<sup>+</sup> Calcd for C<sub>18</sub>H<sub>16</sub>F<sub>2</sub>NO<sup>+</sup> 300.1194; Found 300.1191.

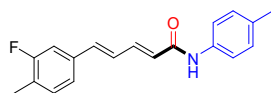

**(2E,4E)-5-(3-Fluoro-4-methylphenyl)-N-(p-tolyl)penta-2,4-dienamide (3vb)**

The compound was from 4-(Buta-1,3-dien-1-yl)-2-fluoro-1-methylbenzene (81.1 mg, 0.5 mmol, *E:Z=1:1.5*) and 1-Methyl-4-nitrobenzene (205.5 mg, 1.5 mmol). The crude residue was purified by flash chromatography (petroleum ether / ethyl acetate = 4:1, R<sub>f</sub> = 0.30) to give the product as a yellow solid (119.6 mg, 81%, *EE/EZ = 3.3:1*).

**<sup>1</sup>H NMR (500 MHz, DMSO)** δ 10.13 (s, 1H), 7.90 – 7.66 (m, 3H), 7.56 (dd, *J* = 25.6, 8.4 Hz, 2H), 7.44 – 7.21 (m, 2H), 7.18 – 7.03 (m, 3H), 6.43 (d, *J* = 14.6 Hz, 1H), 3.36 (s, 3H), 2.26 (s, 3H).  
**<sup>13</sup>C NMR (126 MHz, CDCl<sub>3</sub>)** δ 163.5, 140.5 (d, *J* = 27.56 Hz), 140.1, 137.0 (d, *J* = 16.38 Hz), 132.5, 129.8, 129.3, 127.8, 127.3, 125.8, 123.3, 119.4, 20.7.  
**<sup>19</sup>F NMR (471 MHz, DMSO)** δ -56.19 – -64.56 (m).  
**HRMS (ESI) m/z:** [M+H]<sup>+</sup> Calcd for C<sub>19</sub>H<sub>19</sub>FNO<sup>+</sup> 296.1445; Found 296.1440.

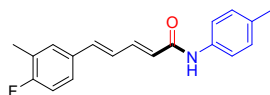

**(2*E*,4*E*)-5-(4-Fluoro-3-methylphenyl)-*N*-(*p*-tolyl)penta-2,4-dienamide (3wb)**

The compound was from 4-(Buta-1,3-dien-1-yl)-1-fluoro-2-methylbenzene (81.1 mg, 0.5 mmol, *E:Z*=1:1.3) and 1-Methyl-4-nitrobenzene (205.5 mg, 1.5 mmol). The crude residue was purified by flash chromatography (petroleum ether / ethyl acetate = 4:1, *R*<sub>f</sub> = 0.30) to give the product as a yellow solid (119.6 mg, 81%, *EE/EZ* = 13.2:1).

**<sup>1</sup>H NMR (500 MHz, DMSO)** δ 10.06 (s, 1H), 7.58 (d, *J* = 8.3 Hz, 2H), 7.53 (d, *J* = 7.5 Hz, 1H), 7.48 – 7.42 (m, 1H), 7.34 (dd, *J* = 14.9, 10.8 Hz, 1H), 7.10 (ddd, *J* = 37.5, 16.3, 10.1 Hz, 4H), 6.97 (d, *J* = 15.6 Hz, 1H), 6.33 (d, *J* = 14.9 Hz, 1H), 2.26 (s, 6H).

**<sup>13</sup>C NMR (126 MHz, DMSO)** δ 163.5, 161.9, 160.0, 140.6 137.9, 136.9, 132.6 (d, *J* = 3.78 Hz), 132.3, 130.3 (d, *J* = 6.3 Hz), 129.2, 126.7 (t, *J* = 8.82 Hz), 125.3 (d, *J* = 7.56 Hz), 124.8 (d, *J* = 17.64 Hz), 119.2 (d, *J* = 11.34 Hz), 115.5, 115.4, 20.6, 14.2.

**<sup>19</sup>F NMR (471 MHz, DMSO)** δ -113.79 – -118.13 (m).

**HRMS (ESI) m/z:** [M+H]<sup>+</sup> Calcd for C<sub>19</sub>H<sub>19</sub>FNO<sup>+</sup> 296.1445; Found 296.1442.

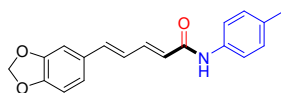

**(2*E*,4*E*)-5-(Benzo[d][1,3]dioxol-5-yl)-*N*-(*p*-tolyl)penta-2,4-dienamide (3xb)**

The compound was from (*E*)-5-(Buta-1,3-dien-1-yl)benzo[d][1,3]dioxole (72.1 mg, 0.5 mmol, *E:Z*>20:1) and 1-Methyl-4-nitrobenzene (205.5 mg, 1.5 mmol). The crude residue was purified by flash chromatography (petroleum ether / ethyl acetate = 4:1, *R*<sub>f</sub> = 0.30) to give the product as a yellow solid (102.9 mg, 67%, *EE/EZ* > 20:1).

**<sup>1</sup>H NMR (500 MHz, DMSO)** δ 8.50 (s, 1H), 7.58 (d, *J* = 8.3 Hz, 1H), 7.31 (dd, *J* = 21.7, 12.1 Hz, 3H), 7.15 – 6.91 (m, 5H), 6.29 (d, *J* = 14.9 Hz, 1H), 6.06 (s, 1H), 2.25 (d, *J* = 10.0 Hz, 5H).

**<sup>13</sup>C NMR (126 MHz, DMSO)** δ 163.9, 152.8, 148.2, 148.1, 141.0, 139.0, 137.4, 132.3, 130.7, 129.4, 125.3, 123.1, 119.3, 118.4, 118.3, 108.7, 105.9, 101.5, 20.5.

**HRMS (ESI) m/z:** [M+H]<sup>+</sup> Calcd for C<sub>19</sub>H<sub>18</sub>NO<sub>3</sub><sup>+</sup> 308.1281; Found 308.1277.

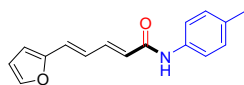

**(2*E*,4*E*)-5-(Furan-2-yl)-*N*-(*p*-tolyl)penta-2,4-dienamide (3yb)**

The compound was from 2-(Buta-1,3-dien-1-yl)furan (60.2 mg, 0.5 mmol, *E:Z*=1:2.7) and 1-Methyl-4-nitrobenzene (205.5 mg, 1.5 mmol). The crude residue was purified by flash

chromatography (petroleum ether / ethyl acetate = 4:1, R<sub>f</sub> = 0.30) to give the product as a yellow solid (84.9 mg, 67%, *EE/EZ* = 10.0:1).

**<sup>1</sup>H NMR (500 MHz, DMSO)** δ 10.04 (s, 1H), 7.75 (s, 1H), 7.56 (d, *J* = 8.3 Hz, 2H), 7.31 (dd, *J* = 14.9, 11.2 Hz, 1H), 7.12 (d, *J* = 8.3 Hz, 2H), 6.91 (d, *J* = 15.5 Hz, 1H), 6.81 (dd, *J* = 15.4, 11.2 Hz, 1H), 6.67 (d, *J* = 3.3 Hz, 1H), 6.58 (dd, *J* = 3.3, 1.8 Hz, 1H), 6.31 (d, *J* = 14.9 Hz, 1H), 2.25 (s, 3H).

**<sup>13</sup>C NMR (126 MHz, DMSO)** δ 164.0, 152.5, 144.7, 140.4, 137.3, 132.6, 129.6, 126.4, 125.8, 125.1, 119.5, 112.9, 112.1, 21.0.

**HRMS (ESI) m/z:** [M+H]<sup>+</sup> Calcd for C<sub>16</sub>H<sub>16</sub>NO<sub>2</sub><sup>+</sup> 254.1176; Found 254.1173.

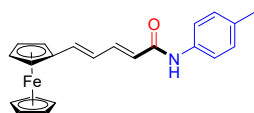

#### (2*E*,4*E*)-1-ferrocene-*N*-(*p*-tolyl)penta-2,4-dienamide (3zb)

The compound was from 2-(Buta-1,3-dien-1-yl)ferrocene (119.1 mg, 0.5 mmol, *E:Z* > 20:1) and 1-Methyl-4-nitrobenzene (205.5 mg, 1.5 mmol). The crude residue was purified by flash chromatography (petroleum ether / ethyl acetate = 4:1, R<sub>f</sub> = 0.30) to give the product as a yellow solid (117.24 mg, 63%, *EE/EZ* > 20:1).

**<sup>1</sup>H NMR (500 MHz, DMSO)** δ 9.95 (s, 1H), 7.56 (d, *J* = 8.3 Hz, 2H), 7.23 (dd, *J* = 14.9, 11.2 Hz, 1H), 7.11 (d, *J* = 8.3 Hz, 2H), 6.81 (d, *J* = 15.3 Hz, 1H), 6.63 (dd, *J* = 15.3, 11.2 Hz, 1H), 6.17 (d, *J* = 14.9 Hz, 1H), 4.59 (s, 2H), 4.38 (s, 2H), 4.15 (s, 5H), 3.34 (s, 1H), 2.25 (s, 3H).

**<sup>13</sup>C NMR (126 MHz, DMSO)** δ 164.0, 141.1, 139.1, 136.9, 132.0, 129.1, 124.1, 122.2, 118.8, 81.5, 69.8, 69.3, 67.5, 20.5.

**HRMS (ESI) m/z:** [M+H]<sup>+</sup> Calcd for C<sub>22</sub>H<sub>23</sub>FeNO<sup>+</sup> 373.1124; Found 373.1002.

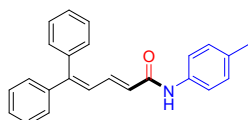

#### (*E*)-5,5-Diphenyl-*N*-(*p*-tolyl)penta-2,4-dienamide (3Ab)

The compound was from Buta-1,3-diene-1,1-diyldibenzene (103.2 mg, 0.5 mmol, *E:Z* > 20:1) and 1-Methyl-4-nitrobenzene (205.5 mg, 1.5 mmol). The crude residue was purified by flash chromatography (petroleum ether / ethyl acetate = 4:1, R<sub>f</sub> = 0.30) to give the product as a yellow solid (56.0 mg, 33%, *EE/EZ* > 20:1).

**<sup>1</sup>H NMR (500 MHz, DMSO)** δ 10.08 (s, 1H), 7.61 – 7.41 (m, 5H), 7.34 (dt, *J* = 8.1, 6.8 Hz, 5H), 7.19 (d, *J* = 6.7 Hz, 2H), 7.16 – 6.97 (m, 5H), 6.43 (d, *J* = 14.4 Hz, 1H), 2.23 (s, 3H).

**<sup>13</sup>C NMR (126 MHz, DMSO)** δ 163.9, 148.8, 141.1, 139.0, 138.0, 137.2, 132.7, 130.4, 129.6, 129.0, 128.6, 128.0, 127.2, 125.8, 119.6, 119.5, 20.9.

**HRMS (ESI) m/z:** [M+H]<sup>+</sup> Calcd for C<sub>24</sub>H<sub>22</sub>NO<sup>+</sup> 340.1617; Found 340.1653.

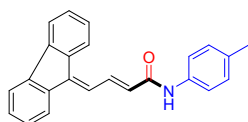

#### (*E*)-4-(9H-Fluoren-9-ylidene)-*N*-(*p*-tolyl)but-2-enamide (3Bb)



The compound was from 9-Allylidene-9H-fluorene (102.2 mg, 0.5 mmol, *E:Z* > 20:1) and 1-Methyl-4-nitrobenzene (205.5 mg, 1.5 mmol). The crude residue was purified by flash chromatography (petroleum ether / ethyl acetate = 4:1, *R*<sub>f</sub> = 0.30) to give the product as a yellow solid (101.3 mg, 60%, *EE/EZ* > 20:1).

**<sup>1</sup>H NMR (500 MHz, DMSO)** δ 9.78 (d, *J* = 54.8 Hz, 1H), 7.88 (d, *J* = 7.4 Hz, 2H), 7.61 (d, *J* = 7.3 Hz, 2H), 7.47 (d, *J* = 8.2 Hz, 3H), 7.36 (dt, *J* = 24.9, 7.3 Hz, 4H), 7.07 (d, *J* = 8.3 Hz, 2H), 6.50 (dt, *J* = 14.9, 7.3 Hz, 1H), 6.06 (d, *J* = 15.2 Hz, 1H), 2.22 (s, 3H).

**<sup>13</sup>C NMR (126 MHz, DMSO)** δ 162.8, 146.1, 141.0, 140.5, 136.7, 132.2, 129.1, 127.3, 127.1, 126.6, 124.6, 120.1, 119.1, 45.9, 34.8, 20.5.

**HRMS (ESI) m/z:** [M+H]<sup>+</sup> Calcd for C<sub>24</sub>H<sub>20</sub>NO<sup>+</sup> 338.1533; Found 338.1531.

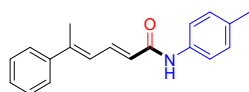

#### **(2*E*,4*E*)-5-Phenyl-*N*-(*p*-tolyl)hexa-2,4-dienamide (3Cb)**

The compound was from (*E*)-Penta-2,4-dien-2-ylbenzene (72.1 mg, 0.5 mmol, *E:Z* > 20:1) and 1-methyl-4-nitrobenzene (205.5 mg, 1.5 mmol). The crude residue was purified by flash chromatography (petroleum ether / ethyl acetate = 4:1, *R*<sub>f</sub> = 0.30) to give the product as a yellow solid (101.3 mg, 73%, *EE/EZ* > 20:1).

**<sup>1</sup>H NMR (500 MHz, DMSO)** δ 10.07 (s, 1H), 7.65 (d, *J* = 11.7 Hz, 1H), 7.62 – 7.55 (m, 4H), 7.39 (t, *J* = 7.5 Hz, 2H), 7.33 (t, *J* = 7.3 Hz, 1H), 7.12 (d, *J* = 8.2 Hz, 2H), 6.75 (d, *J* = 11.7 Hz, 1H), 6.37 (d, *J* = 14.7 Hz, 1H), 2.26 (s, 3H), 2.26 (s, 3H).

**<sup>13</sup>C NMR (126 MHz, DMSO)** δ 164.3, 143.4, 141.9, 137.3, 136.8, 132.7, 129.6, 129.0, 128.6, 126.4, 126.3, 125.0, 119.7, 20.9, 16.5.

**HRMS (ESI) m/z:** [M+H]<sup>+</sup> Calcd for C<sub>19</sub>H<sub>20</sub>NO<sup>+</sup> 278.1539; Found 278.1537.

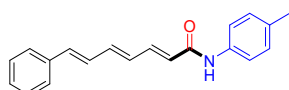

#### **(2*E*,4*E*,6*E*)-7-Phenyl-*N*-(*p*-tolyl)hepta-2,4,6-trienamide (3Db)**

The compound was from ((*1E*)-Hexa-1,3,5-trien-1-yl)benzene (78.1 mg, 0.5 mmol, *E:Z* = 1:1.2) and 1-Methyl-4-nitrobenzene (205.5 mg, 1.5 mmol). The crude residue was purified by flash chromatography (petroleum ether / ethyl acetate = 4:1, *R*<sub>f</sub> = 0.30) to give the product as a yellow solid (52.1 mg, 36%, *EE/EZ* = 10.0:1).

**<sup>1</sup>H NMR (500 MHz, DMSO)** δ 10.02 (s, 1H), 7.55 (dd, *J* = 21.7, 8.0 Hz, 4H), 7.33 (dt, *J* = 26.3, 9.3 Hz, 5H), 7.19 – 7.03 (m, 3H), 6.96 – 6.71 (m, 2H), 6.72 – 6.50 (m, 1H), 6.27 (d, *J* = 14.9 Hz, 1H), 2.26 (s, 3H).

**<sup>13</sup>C NMR (126 MHz, DMSO)** δ 163.7, 140.4, 139.8, 136.8, 135.6, 132.4, 131.2, 129.3, 129.0, 128.9, 128.4, 126.9, 125.3, 119.3, 20.7.

**HRMS (ESI) m/z:** [M+H]<sup>+</sup> Calcd for C<sub>20</sub>H<sub>20</sub>NO<sup>+</sup> 290.1539; Found 290.1535.

## **7. References**

- S1. Liu Y., Xie Y.-J., Wang H.-L., Huang H.-M., *J. Am. Chem. Soc.* **2016**, 138, 13, 4314–4317.
- S2. Wang W, He S.-Y., Zhong Y.-Q., Chen J.-H., Cai C., Luo Y.-S., Xia Y.-Z., *J. Org. Chem.* **2022**, 87, 7, 4712 – 4723.

## 8. Copies of NMR Spectra for Compounds

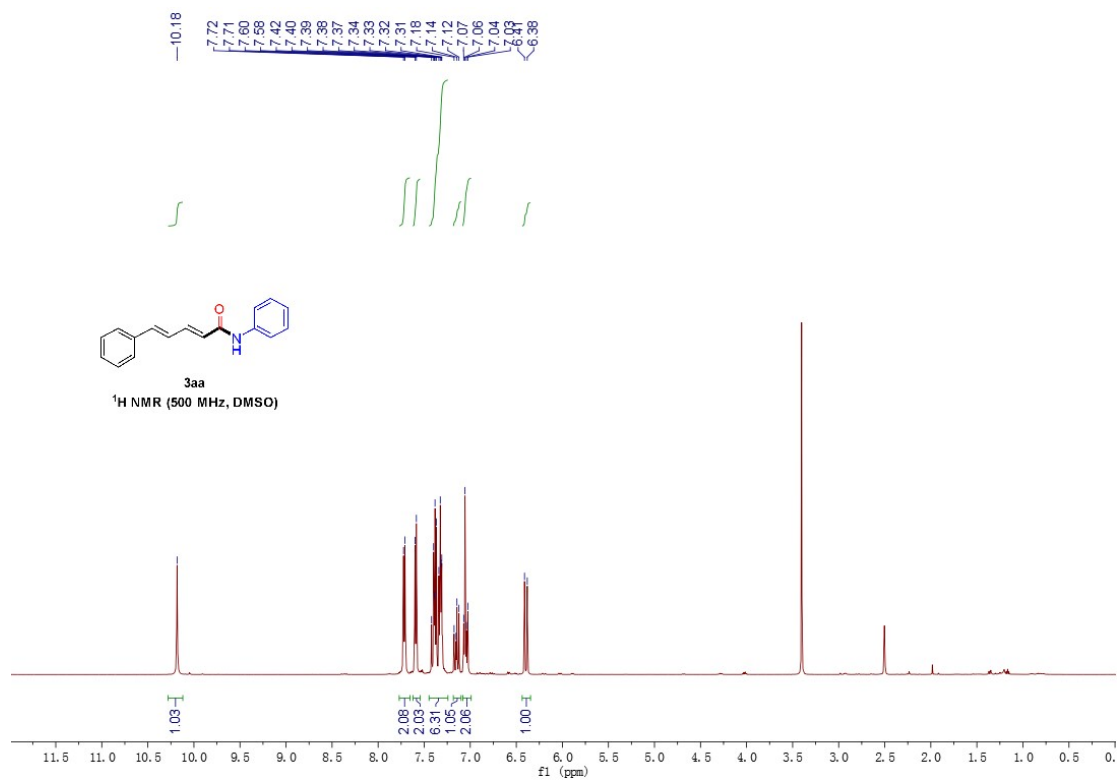

Figure S5. <sup>1</sup>H NMR (500 MHz, DMSO) spectrum of 3aa

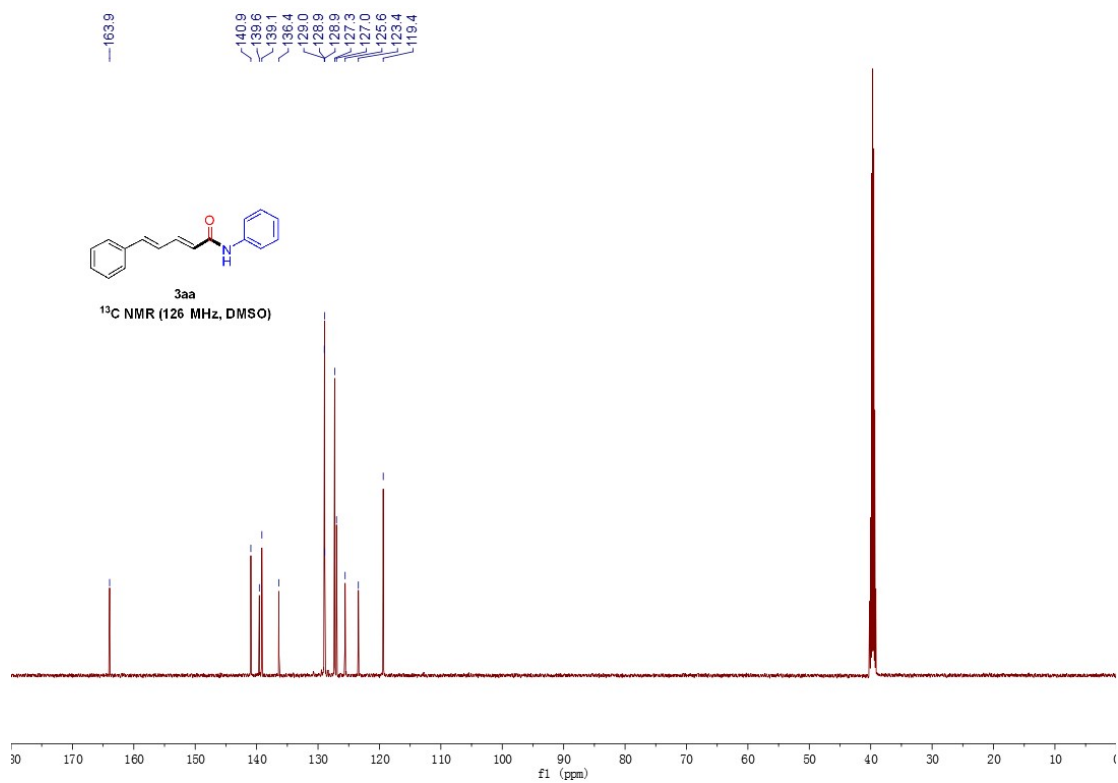

Figure S6. <sup>13</sup>C NMR (126 MHz, DMSO) spectrum of 3aa

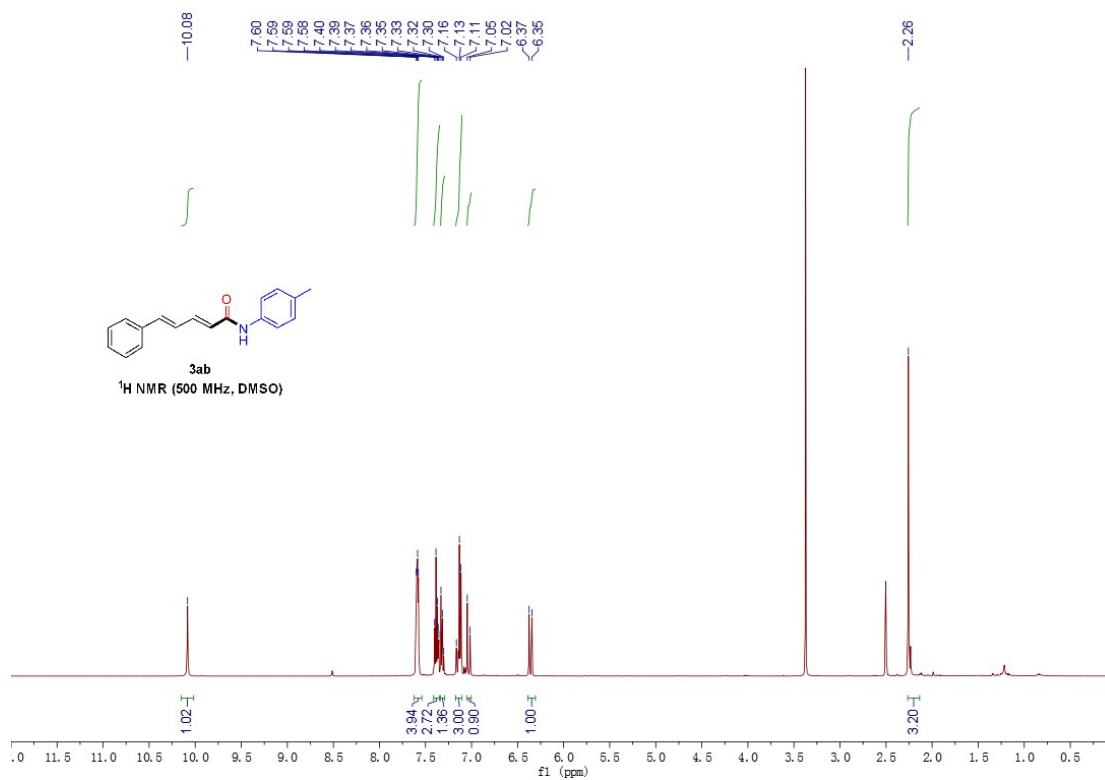

Figure S7. <sup>1</sup>H NMR (500 MHz, DMSO) spectrum of 3ab

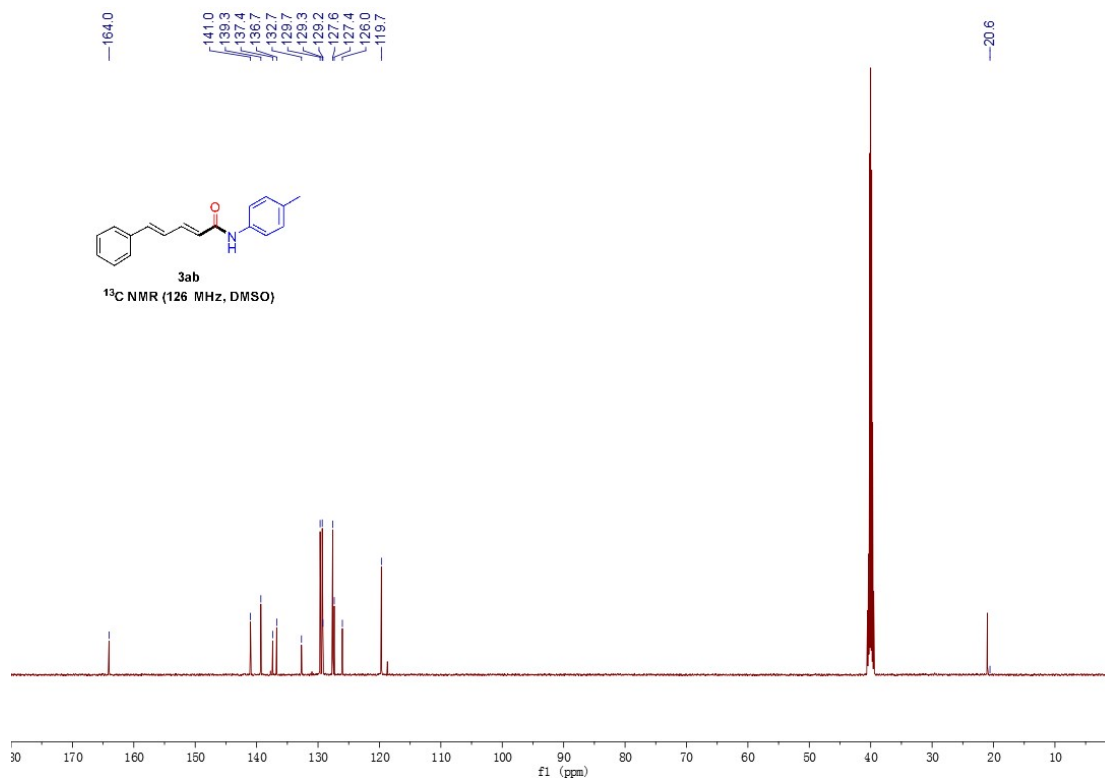

Figure S8. <sup>13</sup>C NMR (126 MHz, DMSO) spectrum of 3ab

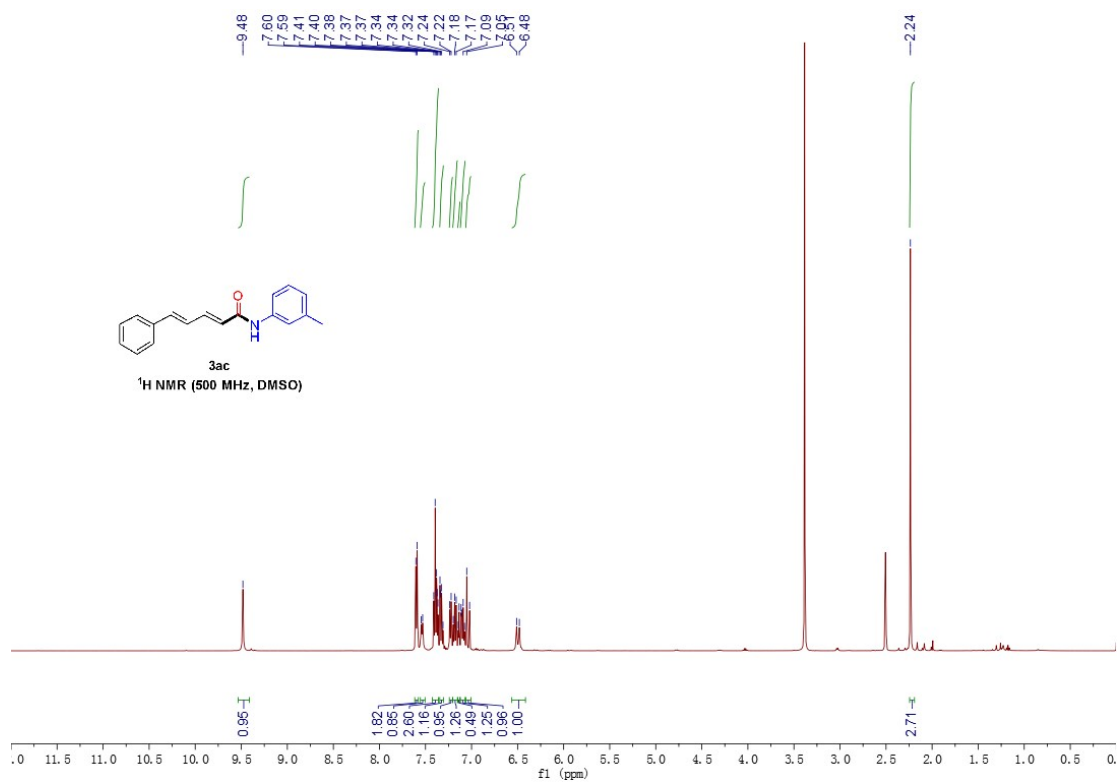

Figure S9. <sup>1</sup>H NMR (500 MHz, DMSO) spectrum of 3ac

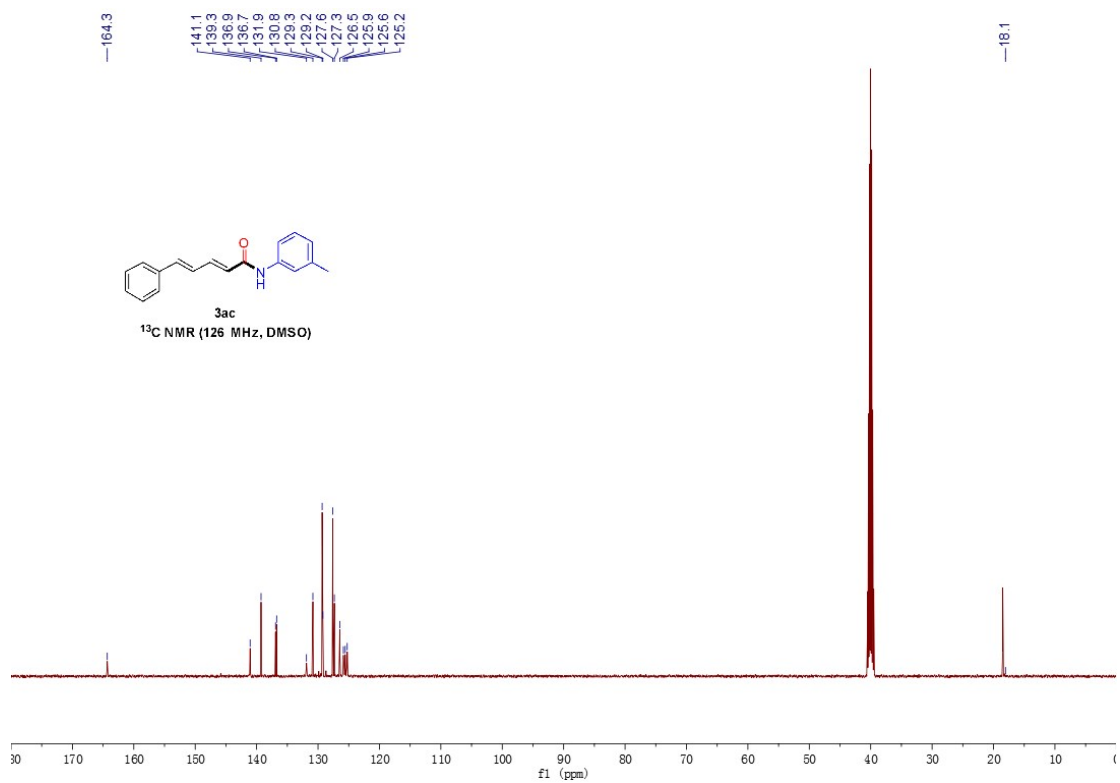

Figure S10. <sup>13</sup>C NMR (126 MHz, DMSO) spectrum of 3ac

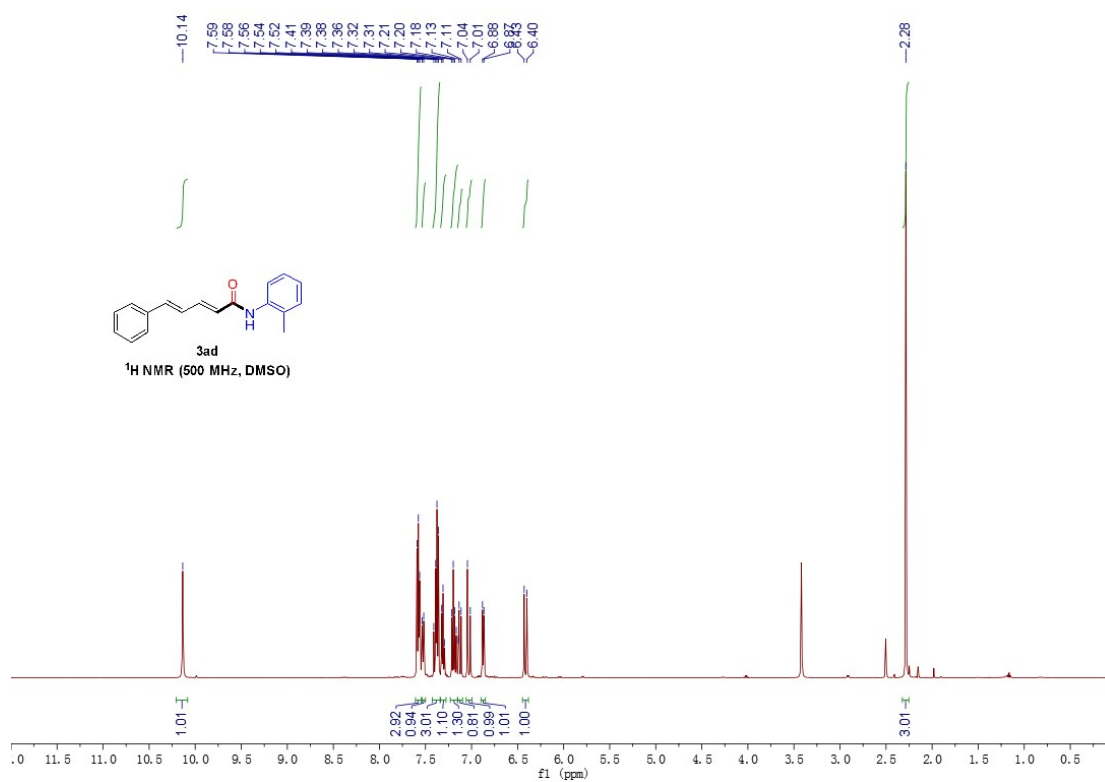

Figure S11. <sup>1</sup>H NMR (500 MHz, DMSO) spectrum of 3ad

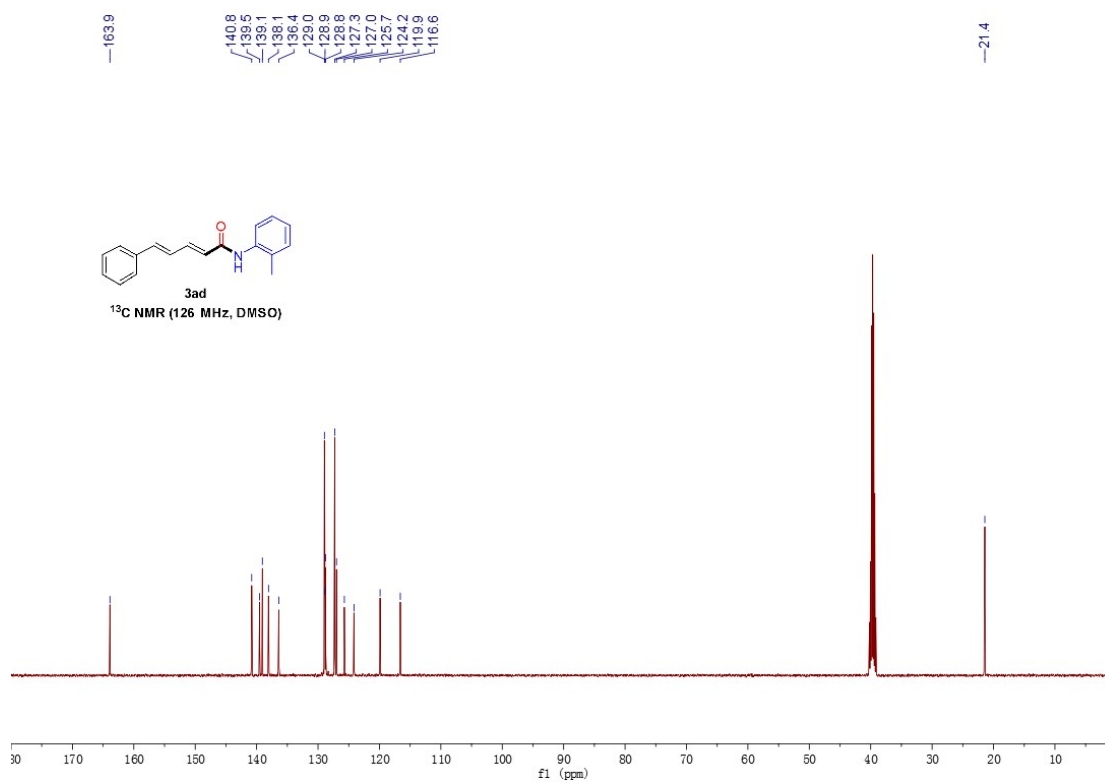

Figure S12. <sup>13</sup>C NMR (126 MHz, DMSO) spectrum of 3ad

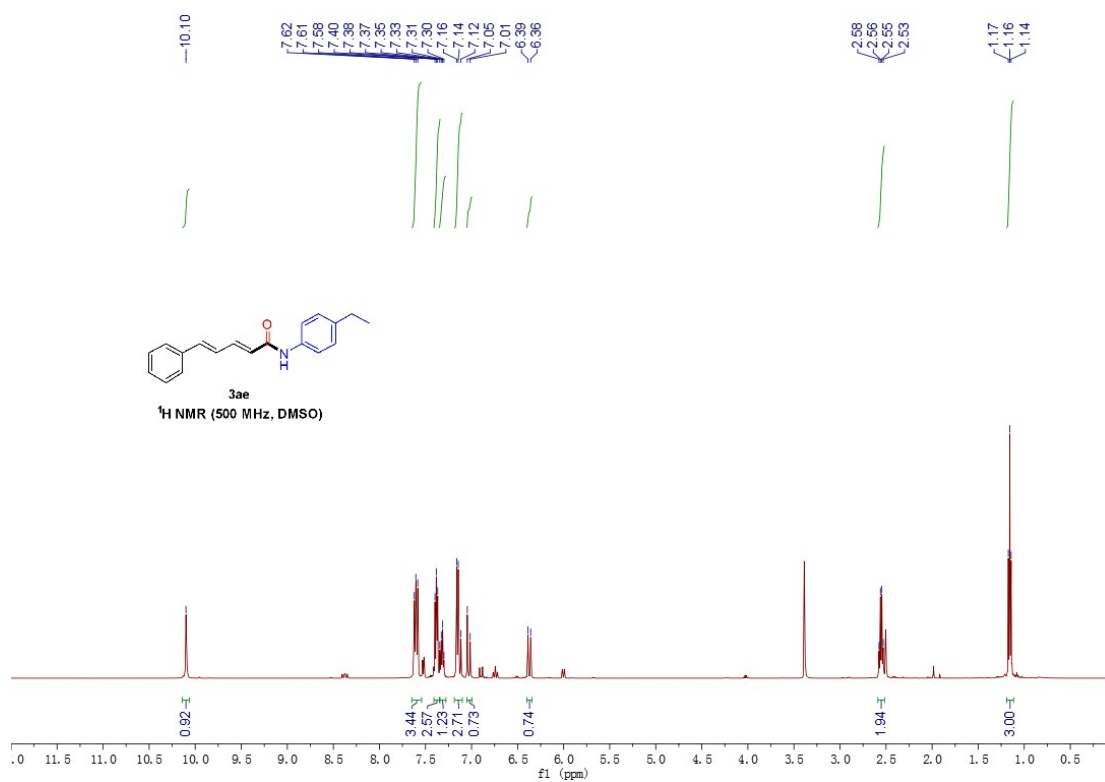

Figure S13. <sup>1</sup>H NMR (500 MHz, DMSO) spectrum of **3ae**

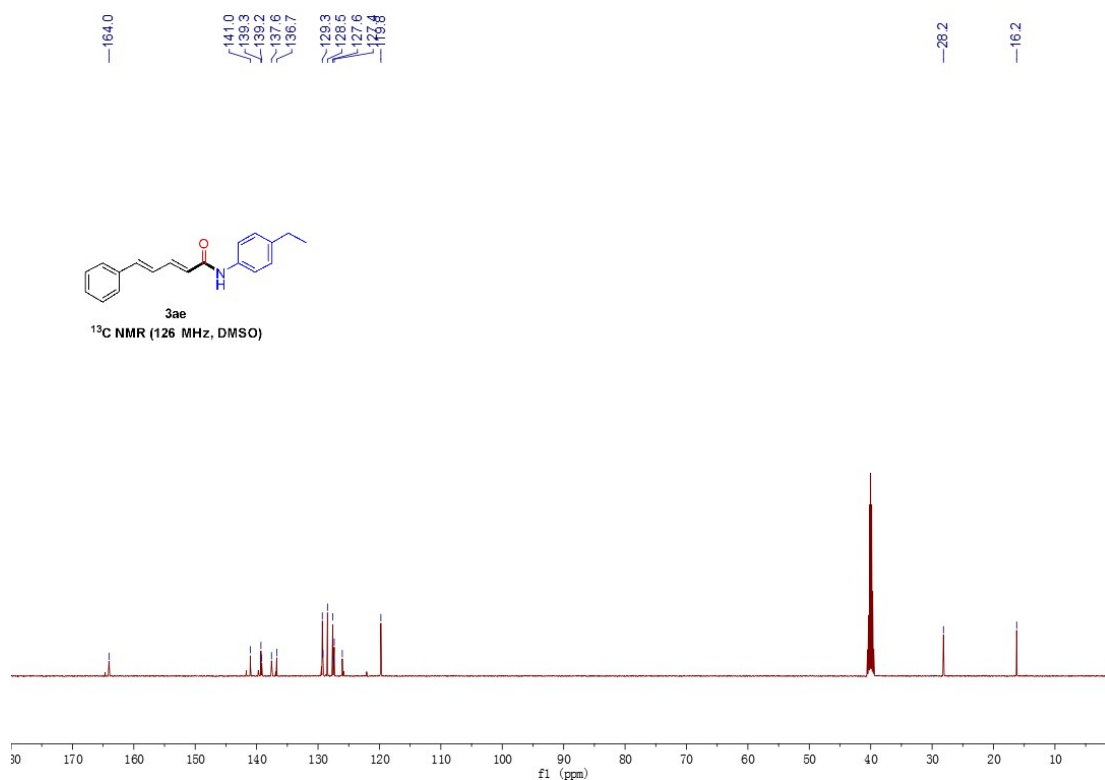

Figure S14. <sup>13</sup>C NMR (126 MHz, DMSO) spectrum of **3ae**

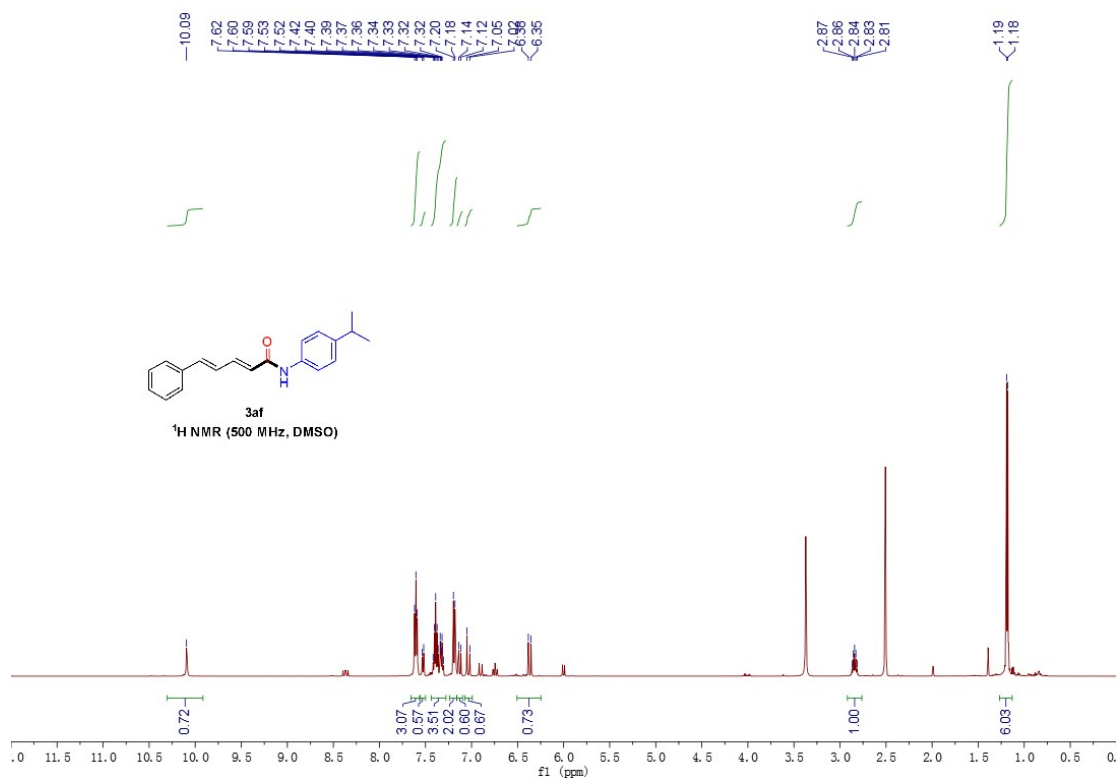

Figure S15. <sup>1</sup>H NMR (500 MHz, DMSO) spectrum of 3af

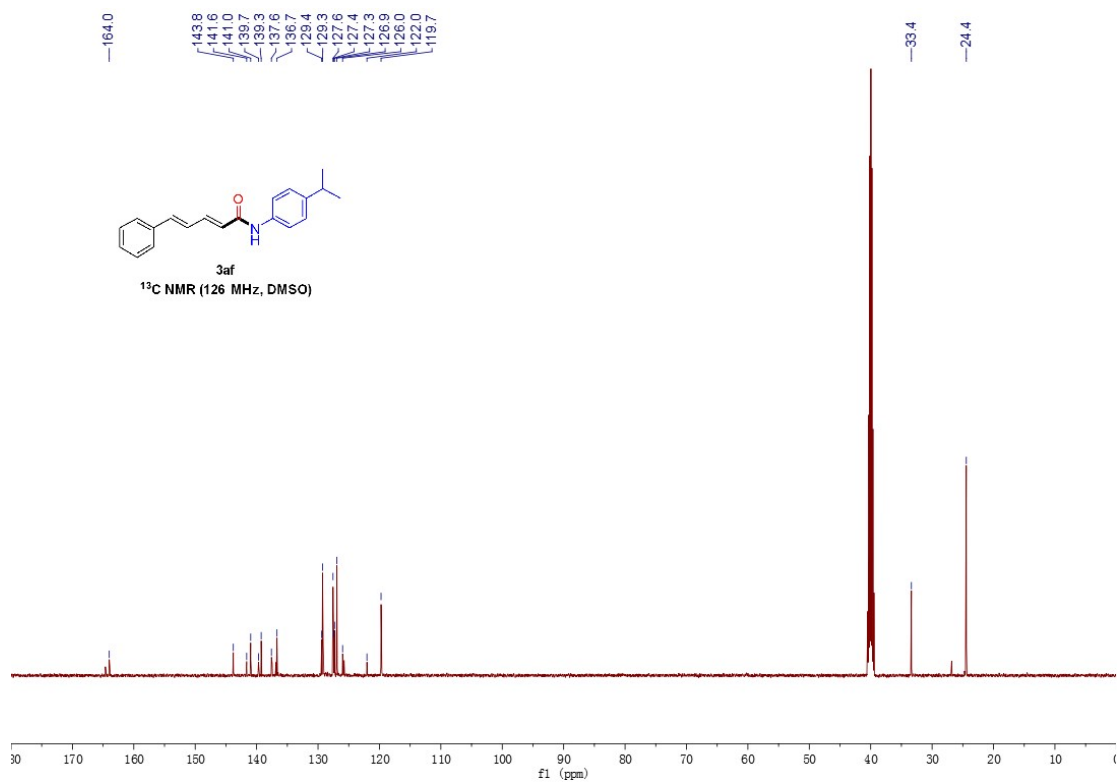

Figure S16. <sup>13</sup>C NMR (126 MHz, DMSO) spectrum of 3af



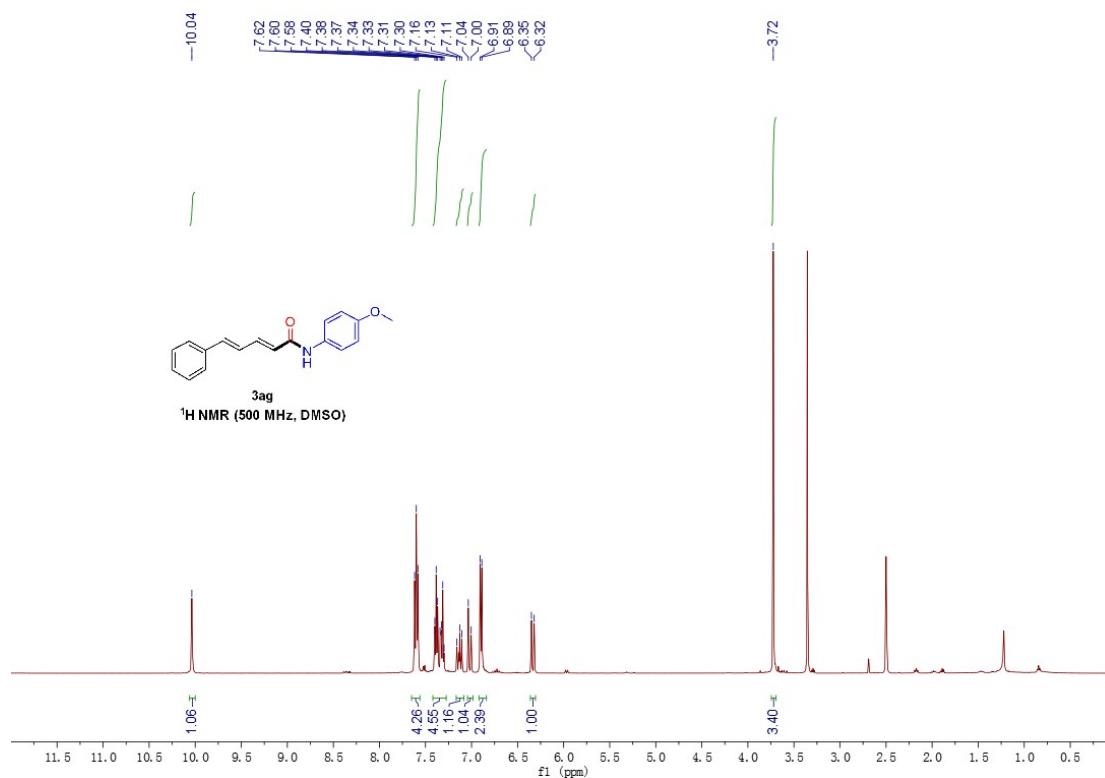

Figure S17. <sup>1</sup>H NMR (500 MHz, DMSO) spectrum of 3ag

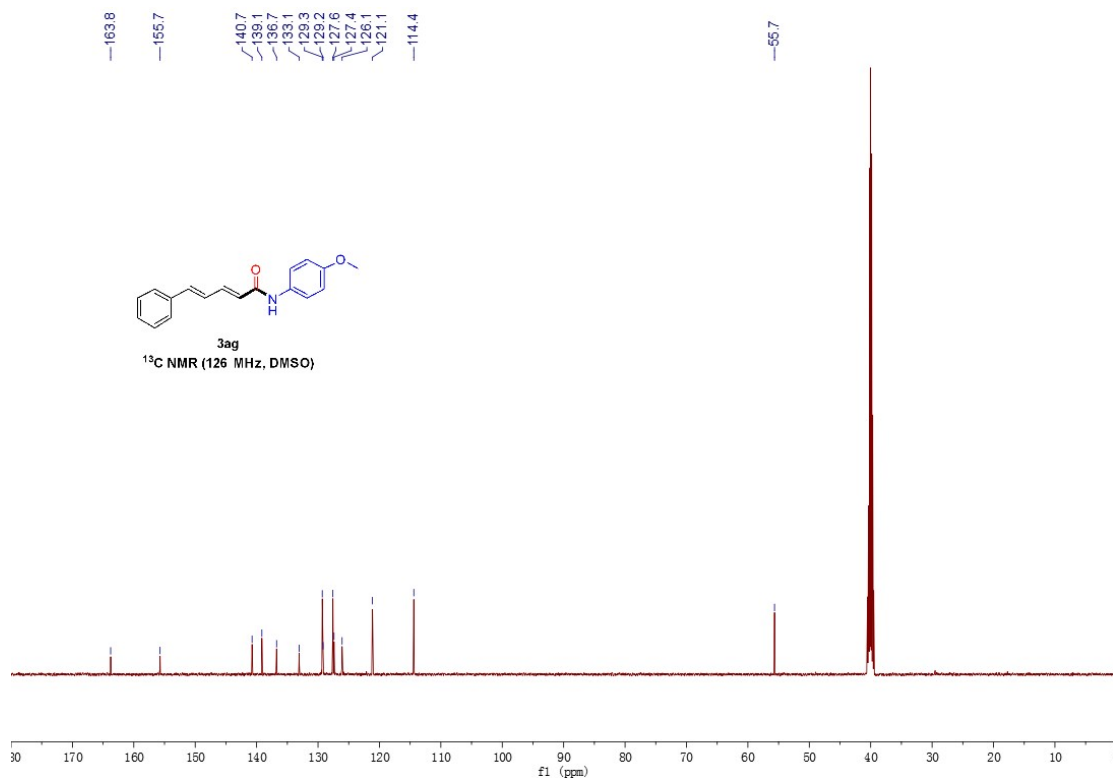

Figure S18. <sup>13</sup>C NMR (126 MHz, DMSO) spectrum of 3ag

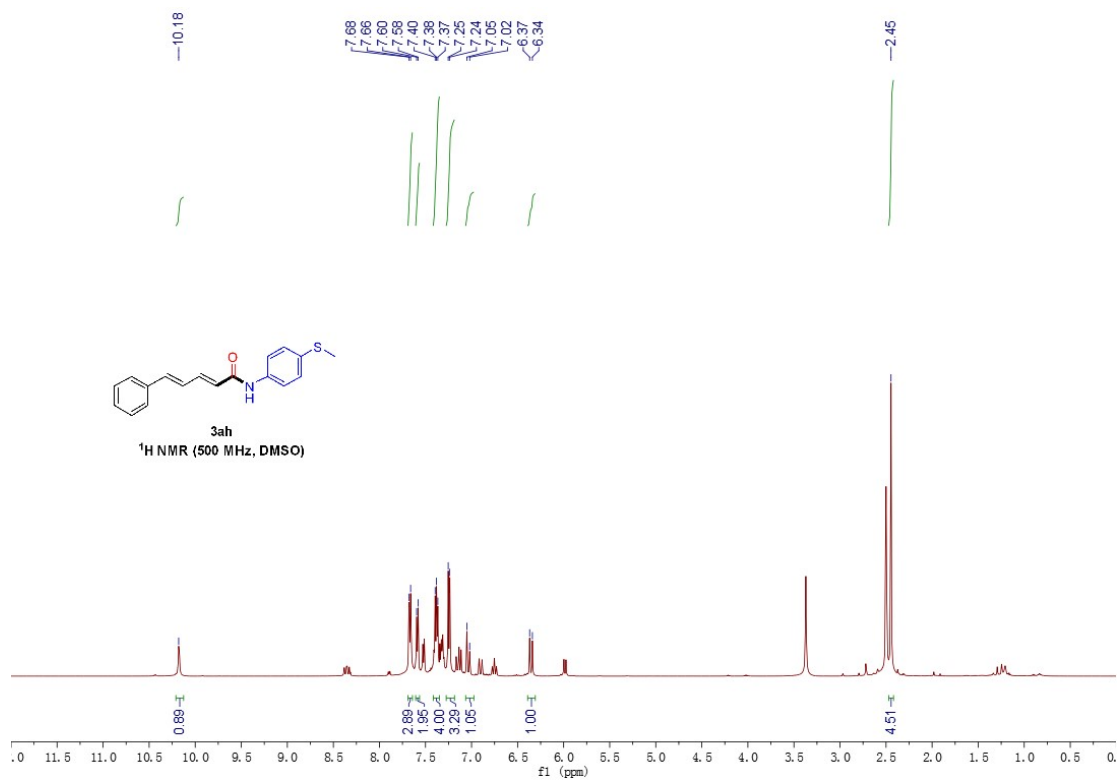

Figure S19. <sup>1</sup>H NMR (500 MHz, DMSO) spectrum of 3ah

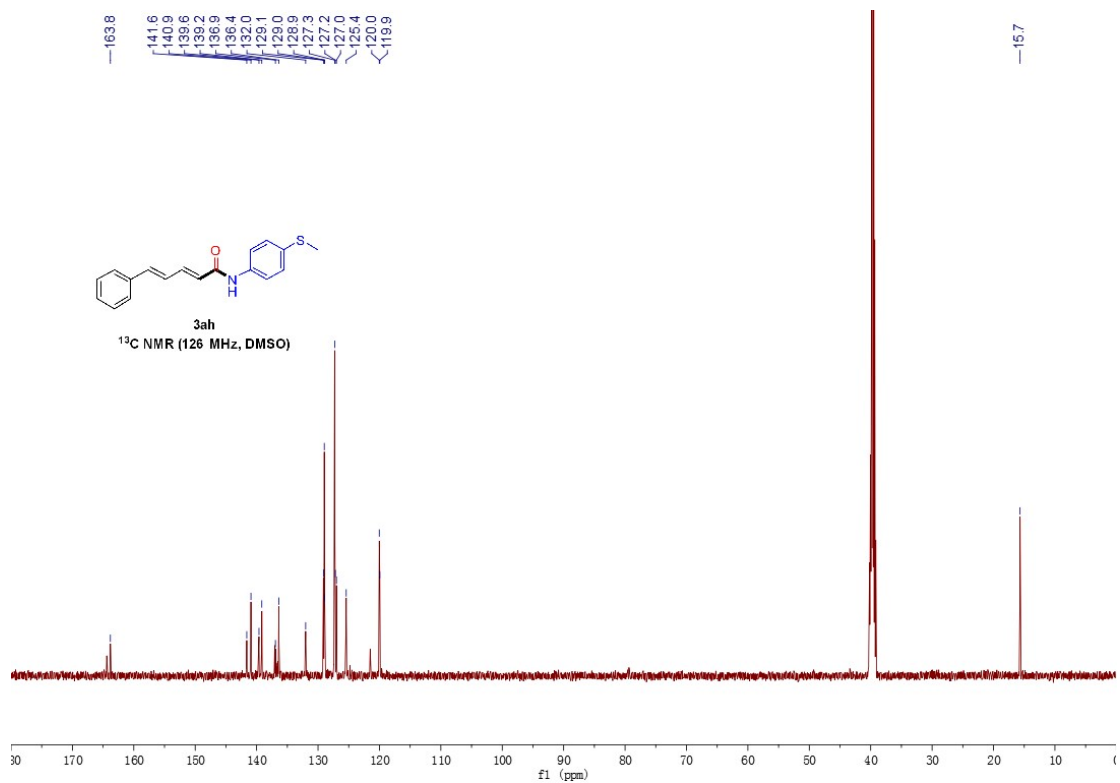

Figure S20. <sup>13</sup>C NMR (126 MHz, DMSO) spectrum of 3ah

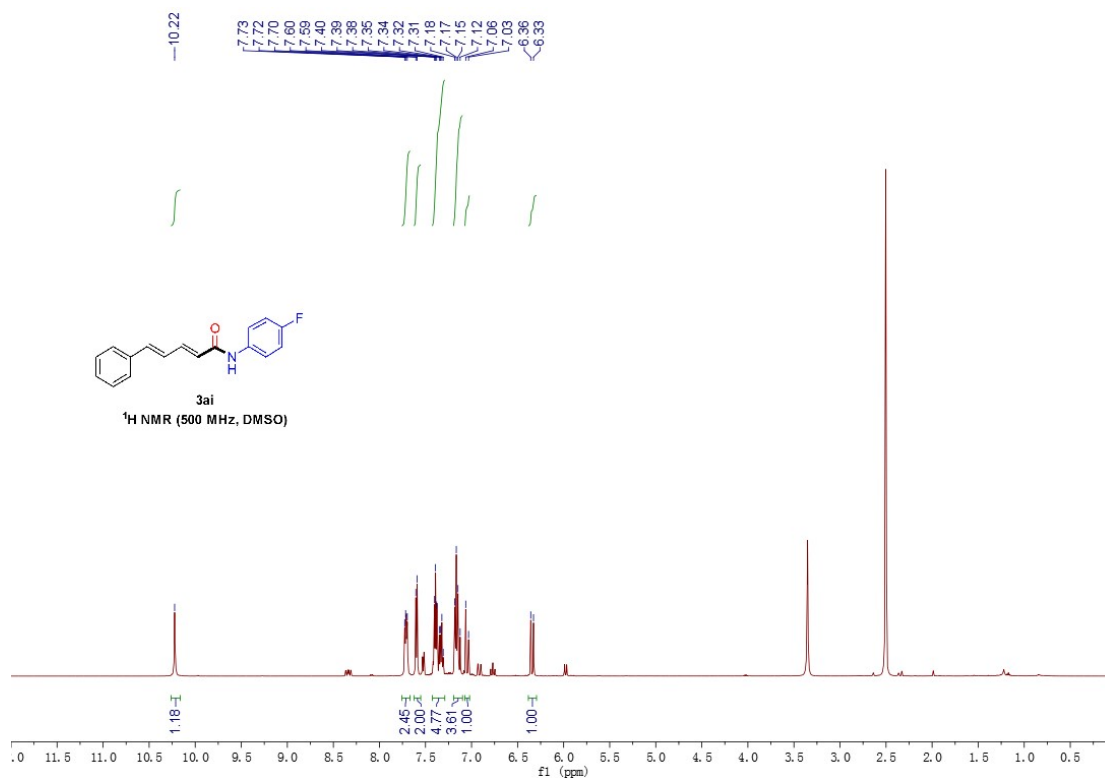

Figure S21. <sup>1</sup>H NMR (500 MHz, DMSO) spectrum of 3ai

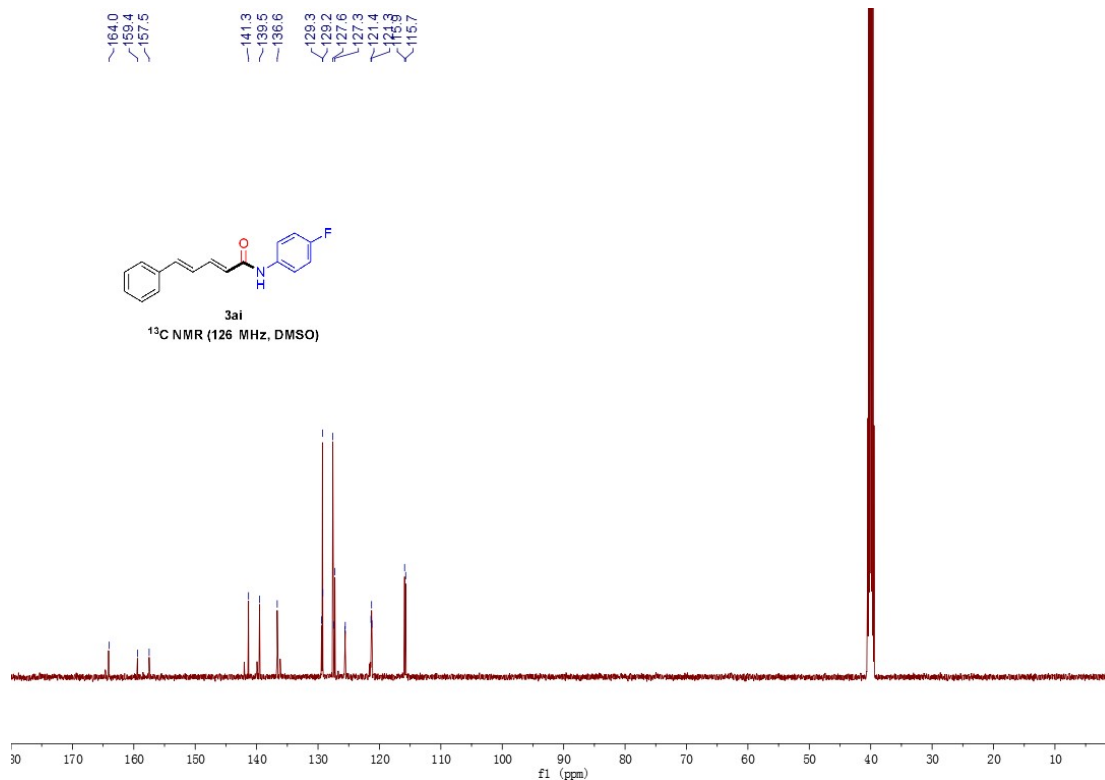

Figure S22. <sup>13</sup>C NMR (126 MHz, DMSO) spectrum of 3ai

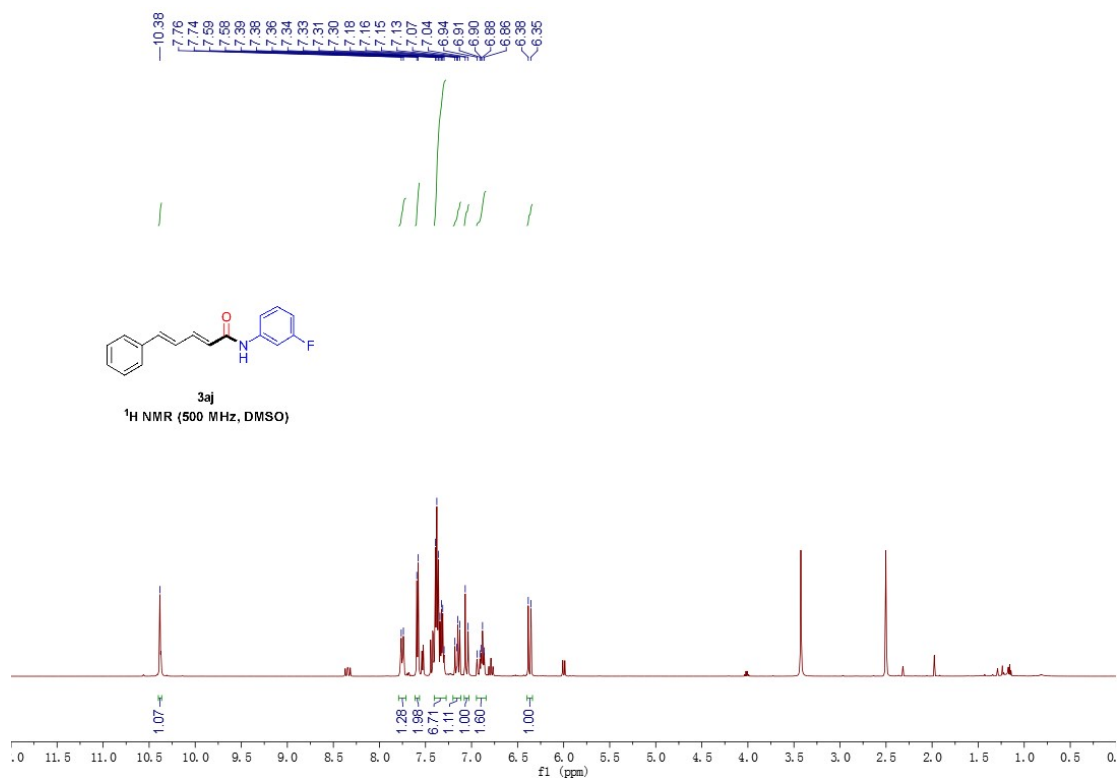

Figure S23. <sup>1</sup>H NMR (500 MHz, DMSO) spectrum of 3aj

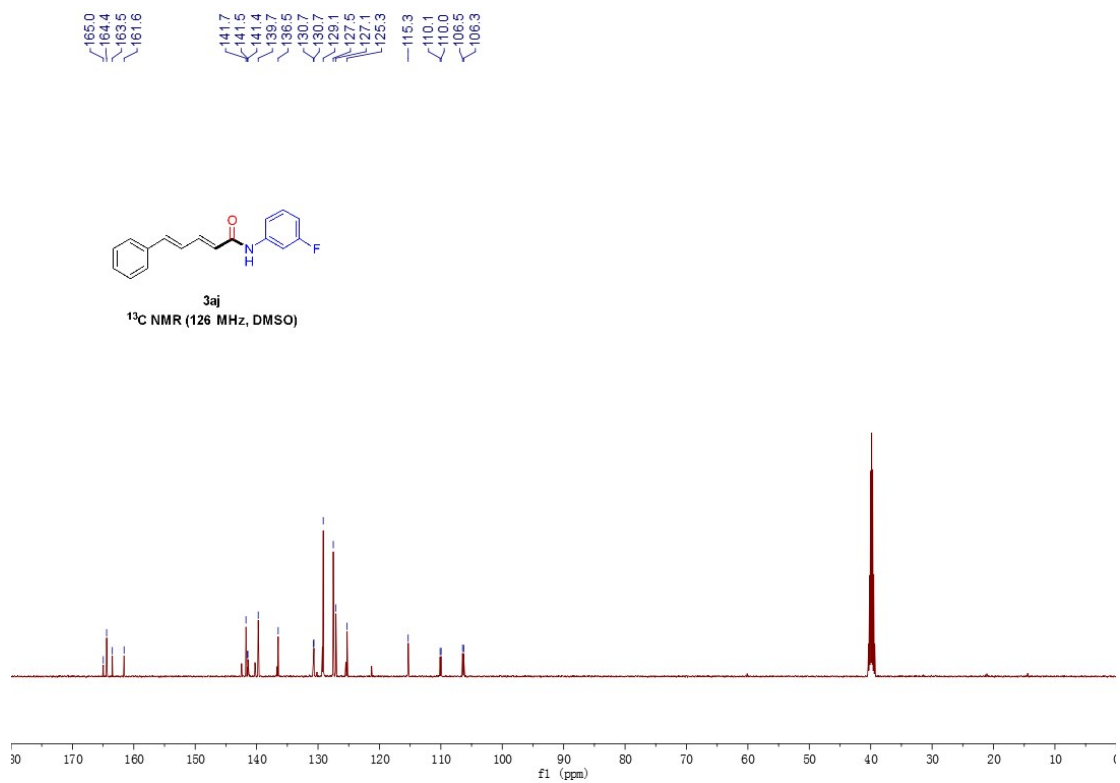

Figure S24. <sup>13</sup>C NMR (126 MHz, DMSO) spectrum of 3aj

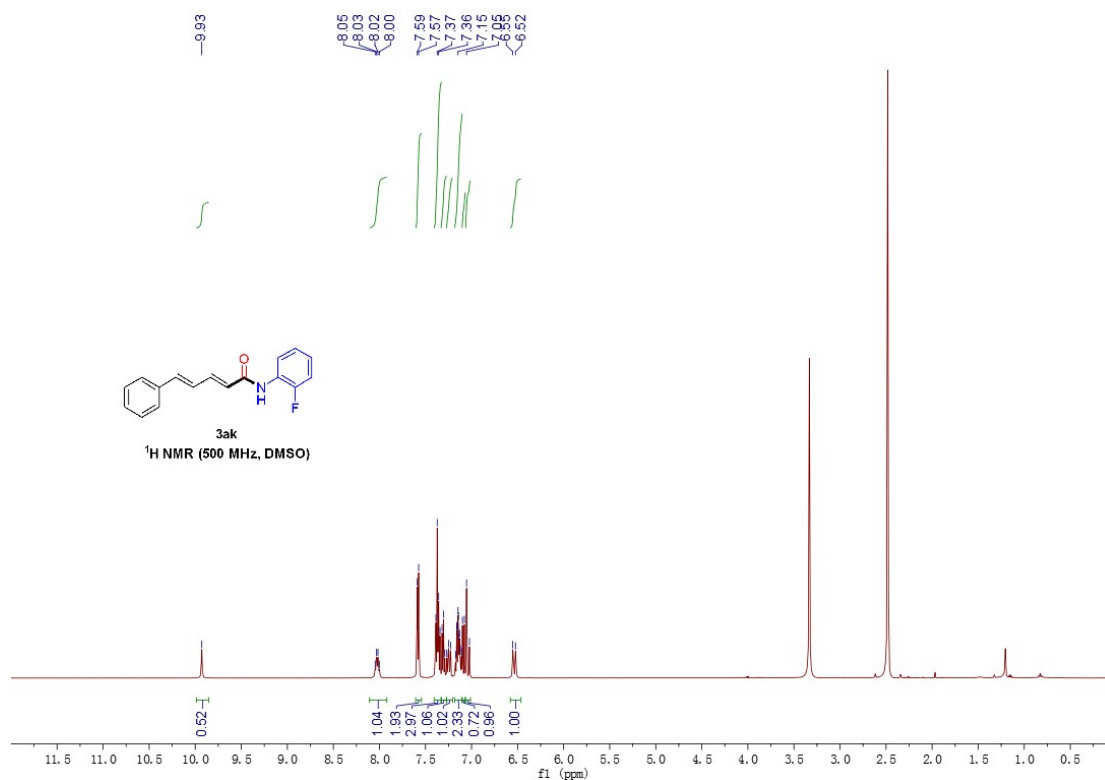

Figure S25. <sup>1</sup>H NMR (500 MHz, DMSO) spectrum of 3ak

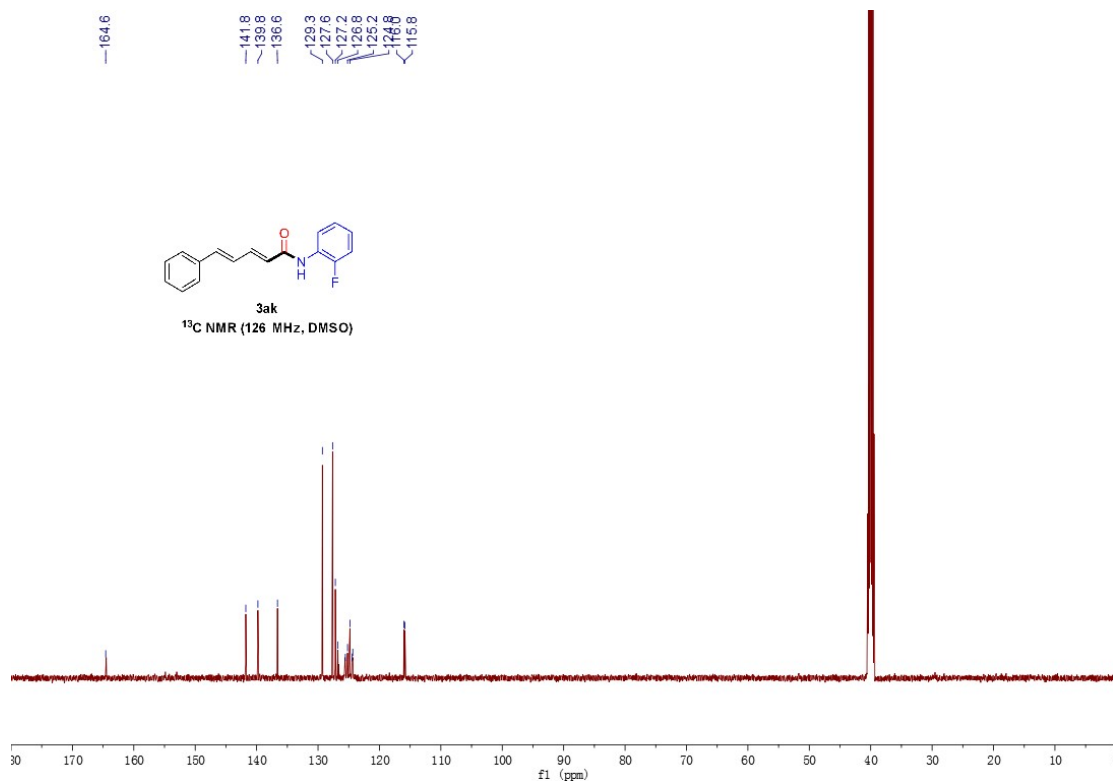

Figure S26. <sup>13</sup>C NMR (126 MHz, DMSO) spectrum of 3ak

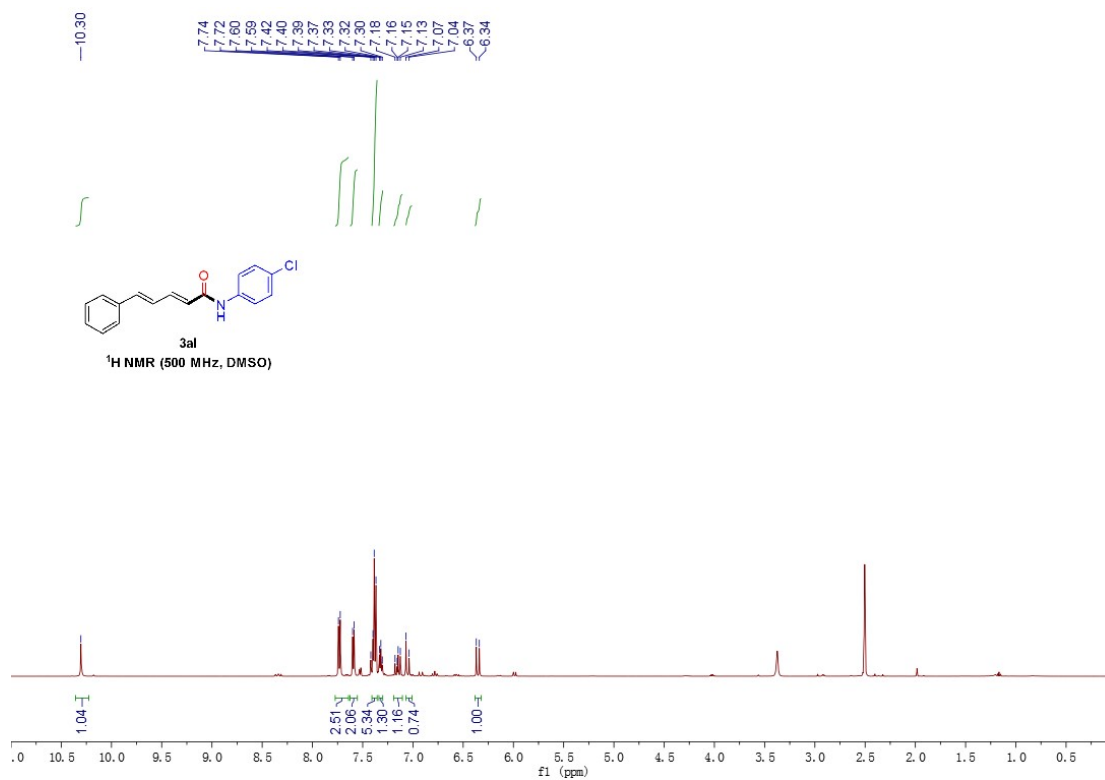

Figure S27. <sup>1</sup>H NMR (500 MHz, DMSO) spectrum of 3al

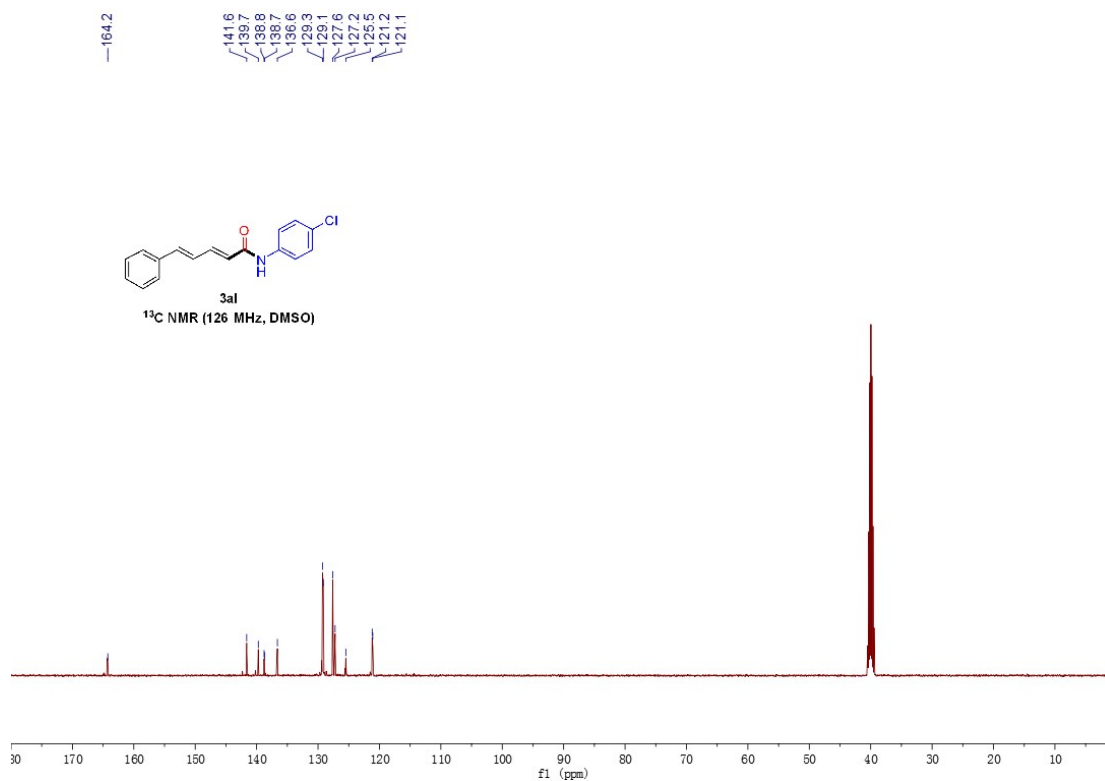

Figure S28. <sup>13</sup>C NMR (126 MHz, DMSO) spectrum of 3al

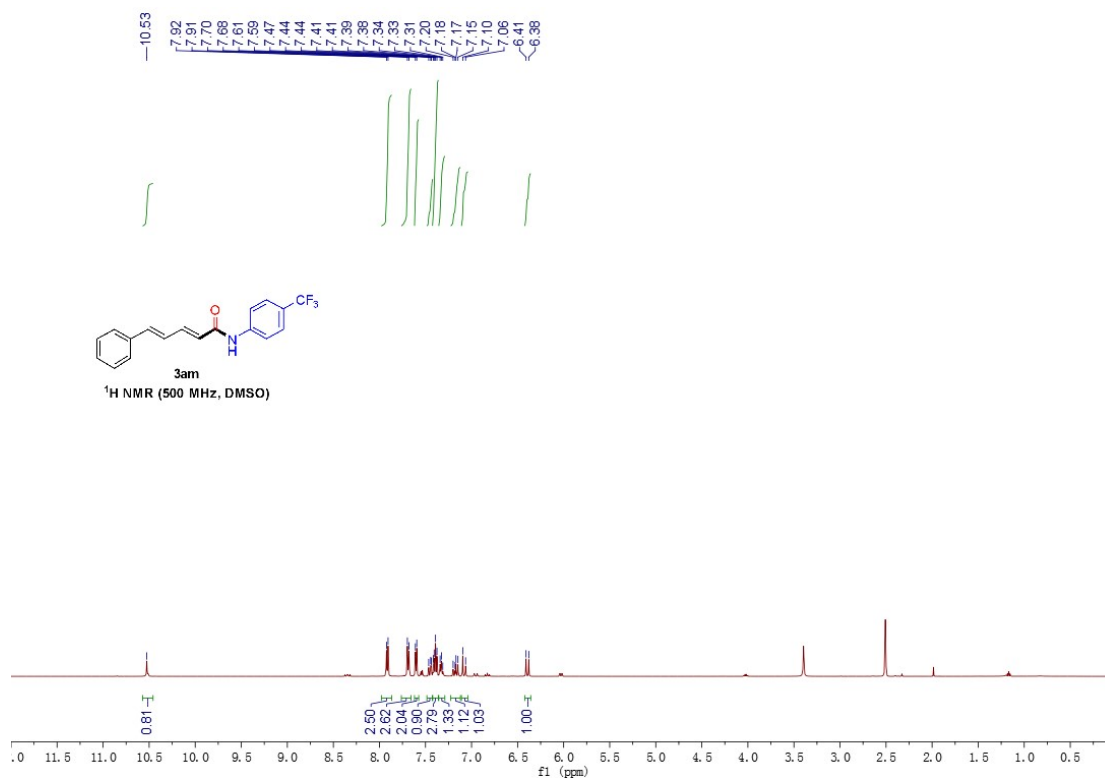

**Figure S29. <sup>1</sup>H NMR (500 MHz, DMSO) spectrum of 3am**

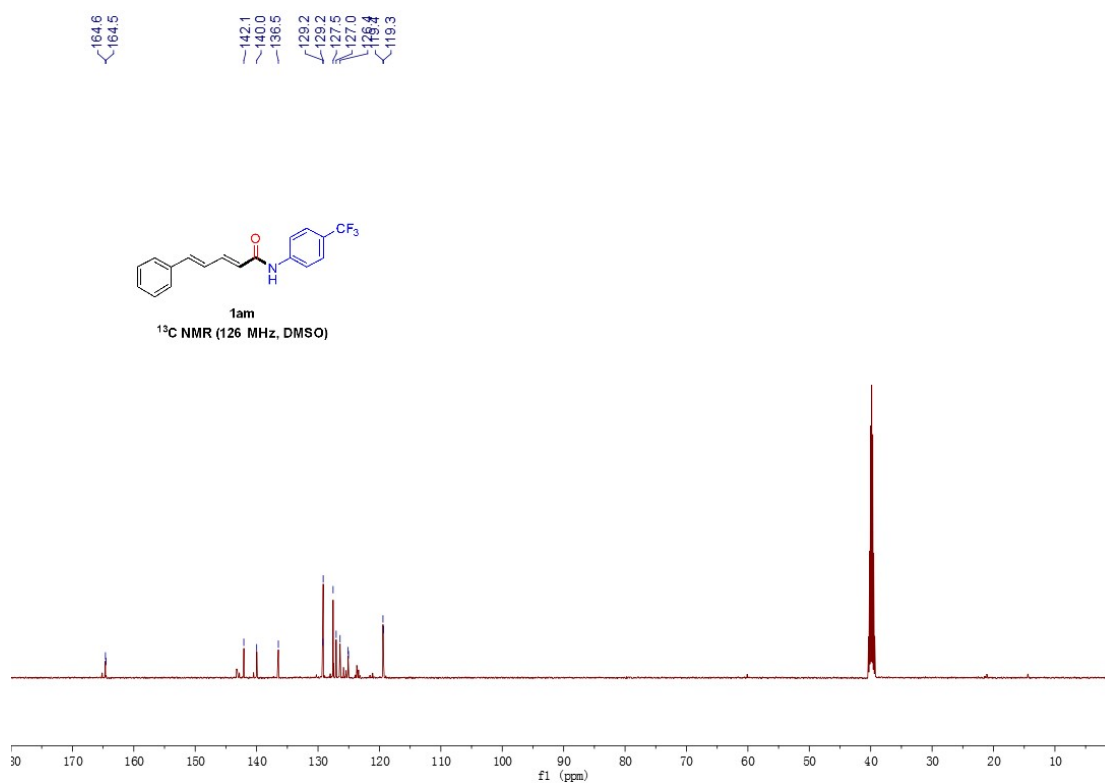

**Figure S30. <sup>13</sup>C NMR (126 MHz, DMSO) spectrum of 3am**

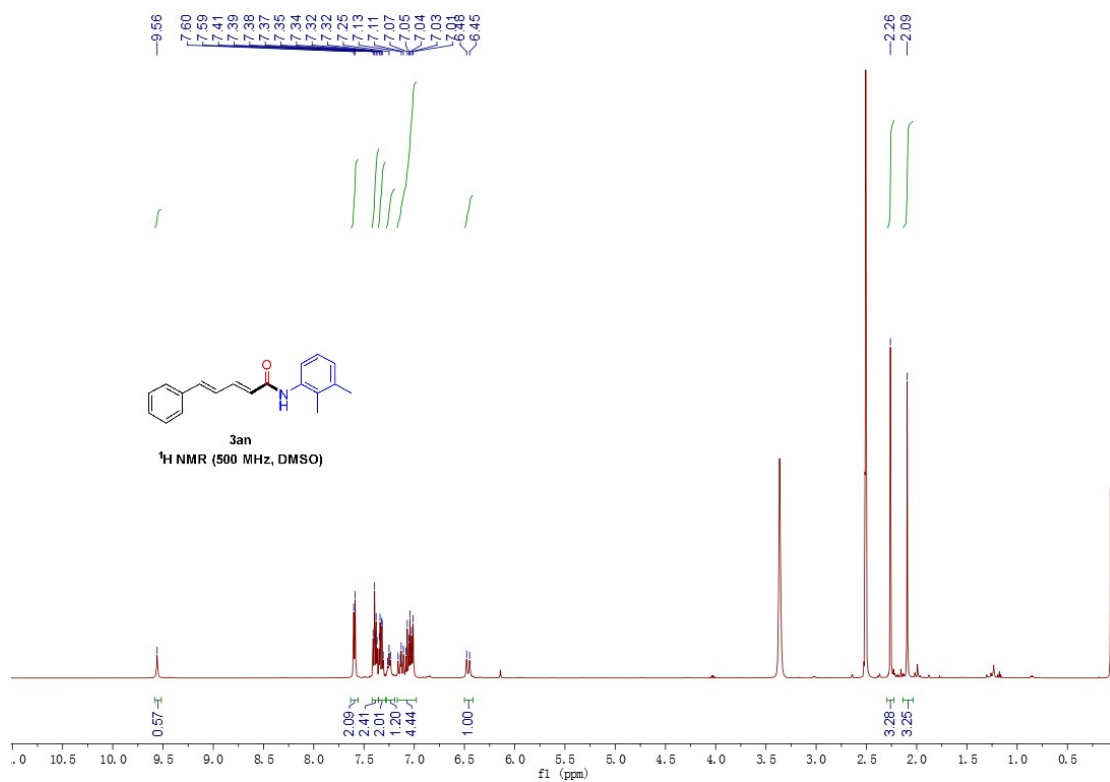

Figure S31. <sup>1</sup>H NMR (500 MHz, DMSO) spectrum of 3an

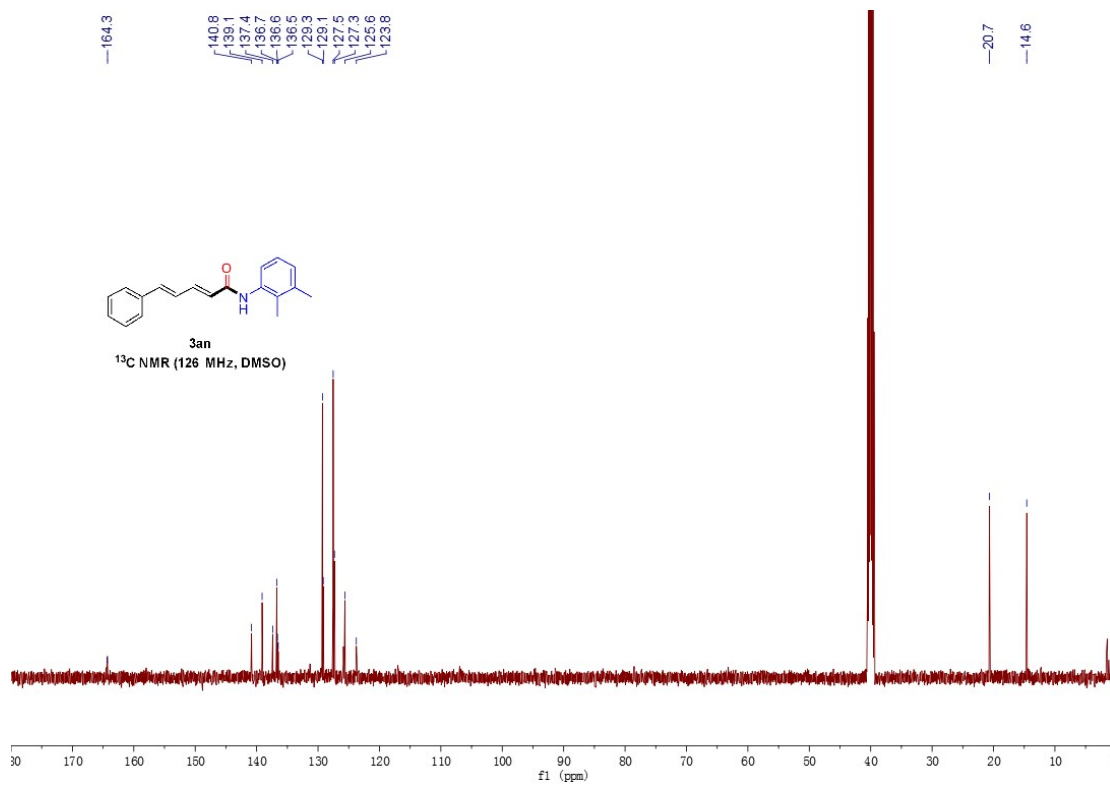

Figure S32. <sup>13</sup>C NMR (126 MHz, DMSO) spectrum of 3an



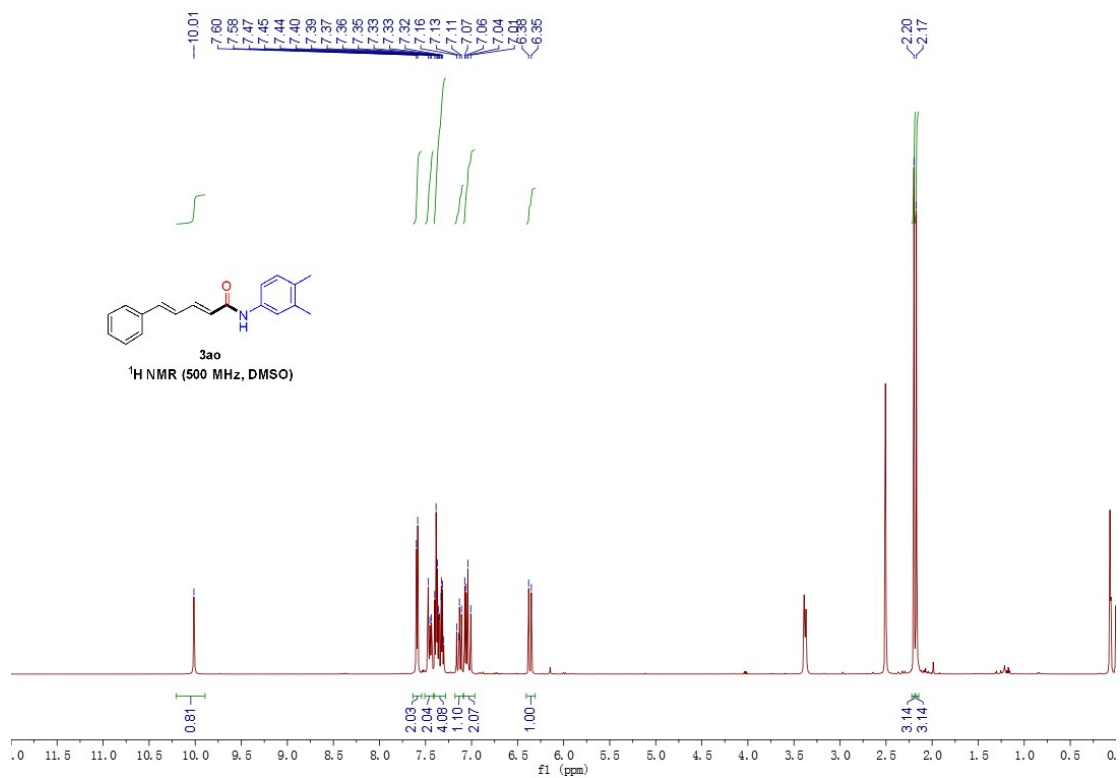

Figure S33. <sup>1</sup>H NMR (500 MHz, DMSO) spectrum of 3ao

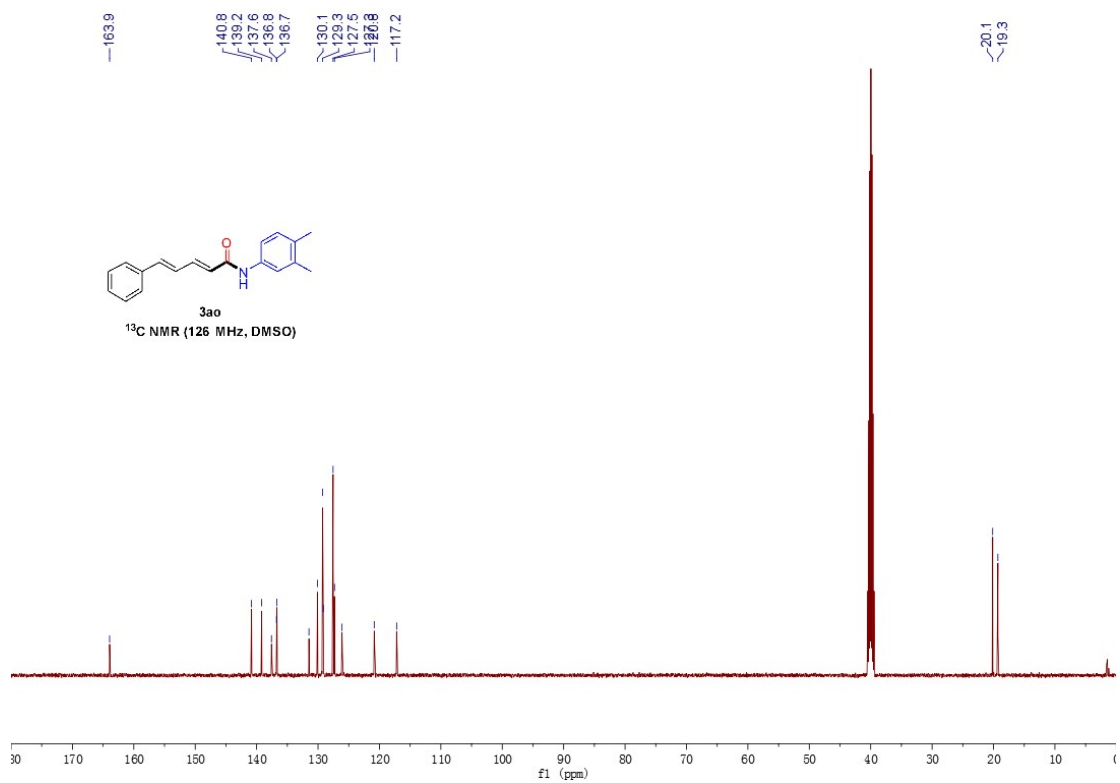

Figure S34. <sup>13</sup>C NMR (126 MHz, DMSO) spectrum of 3ao

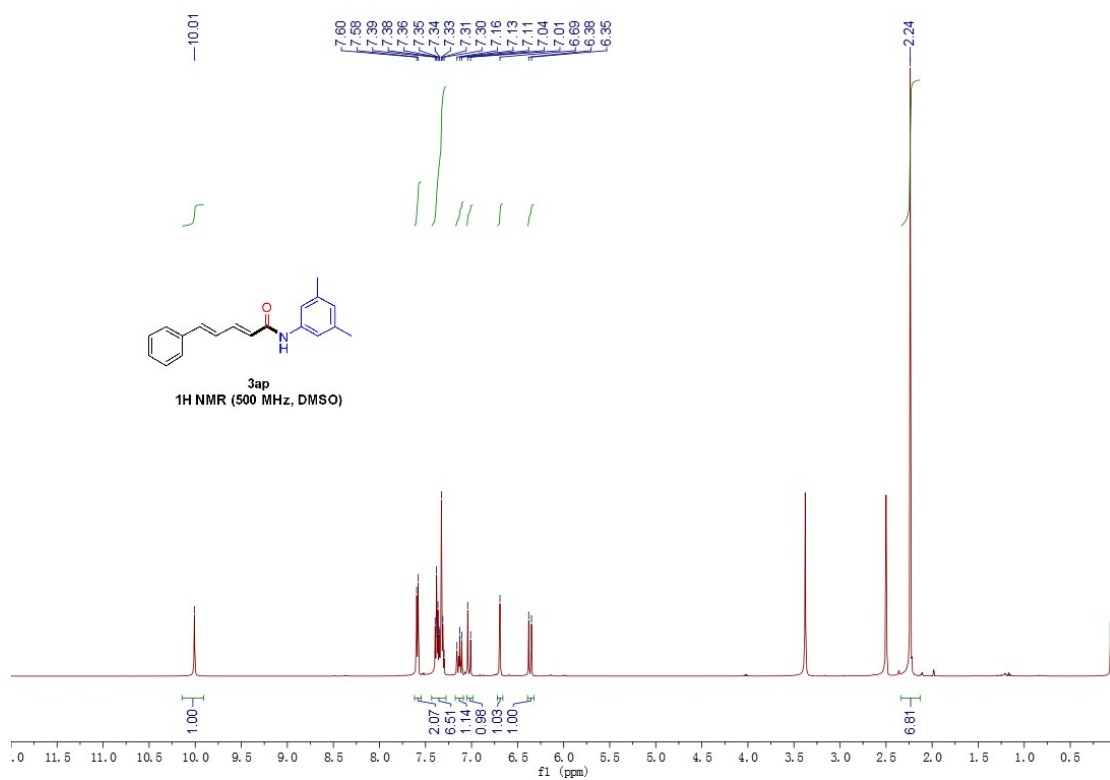

Figure S35. <sup>1</sup>H NMR (500 MHz, DMSO) spectrum of 3ap

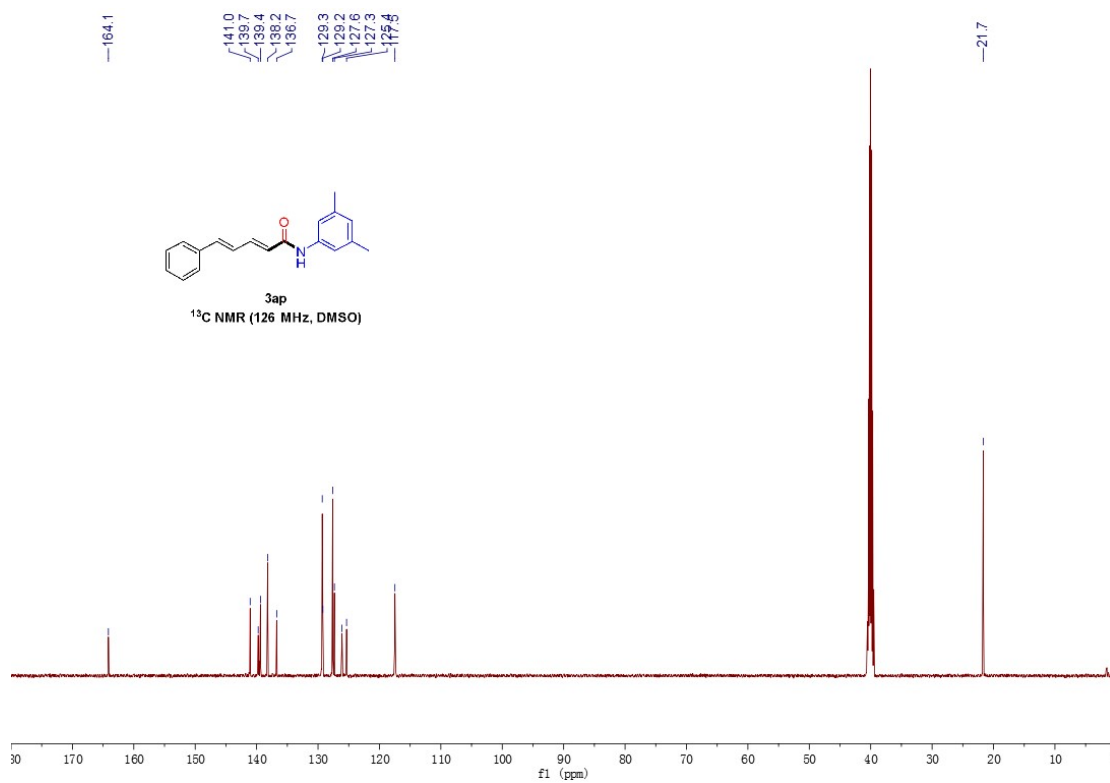

Figure S36. <sup>13</sup>C NMR (126 MHz, DMSO) spectrum of 3ap

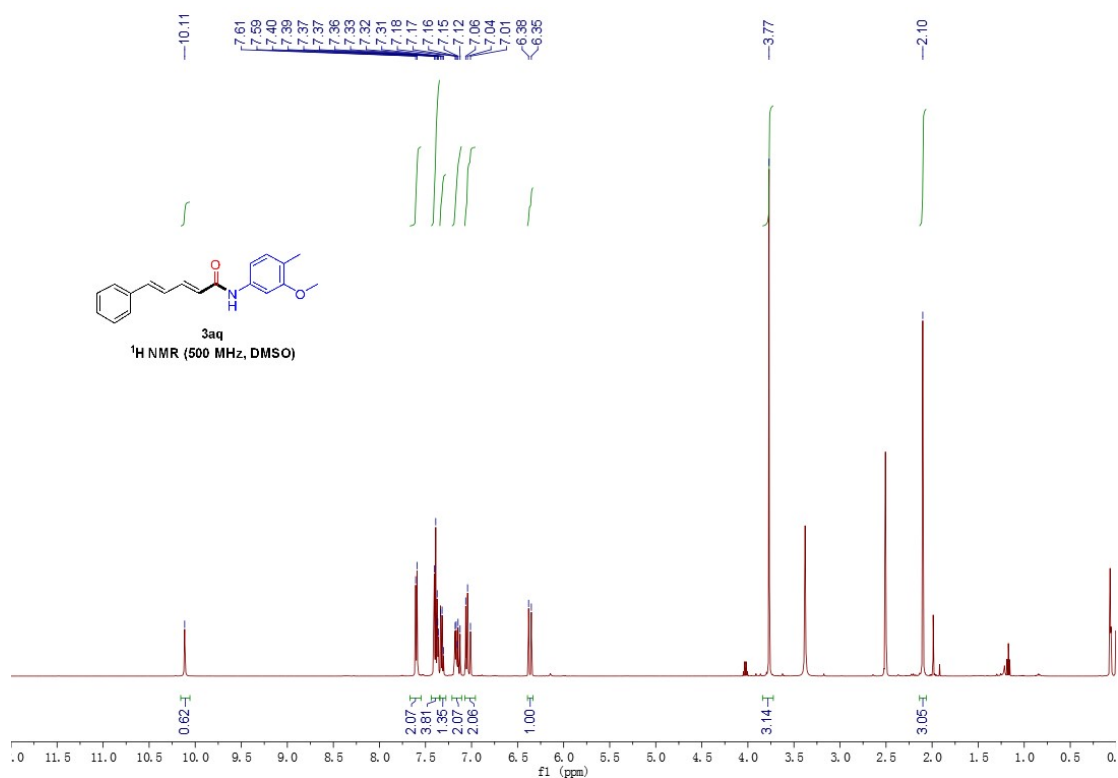

Figure S37. <sup>1</sup>H NMR (500 MHz, DMSO) spectrum of 3aq

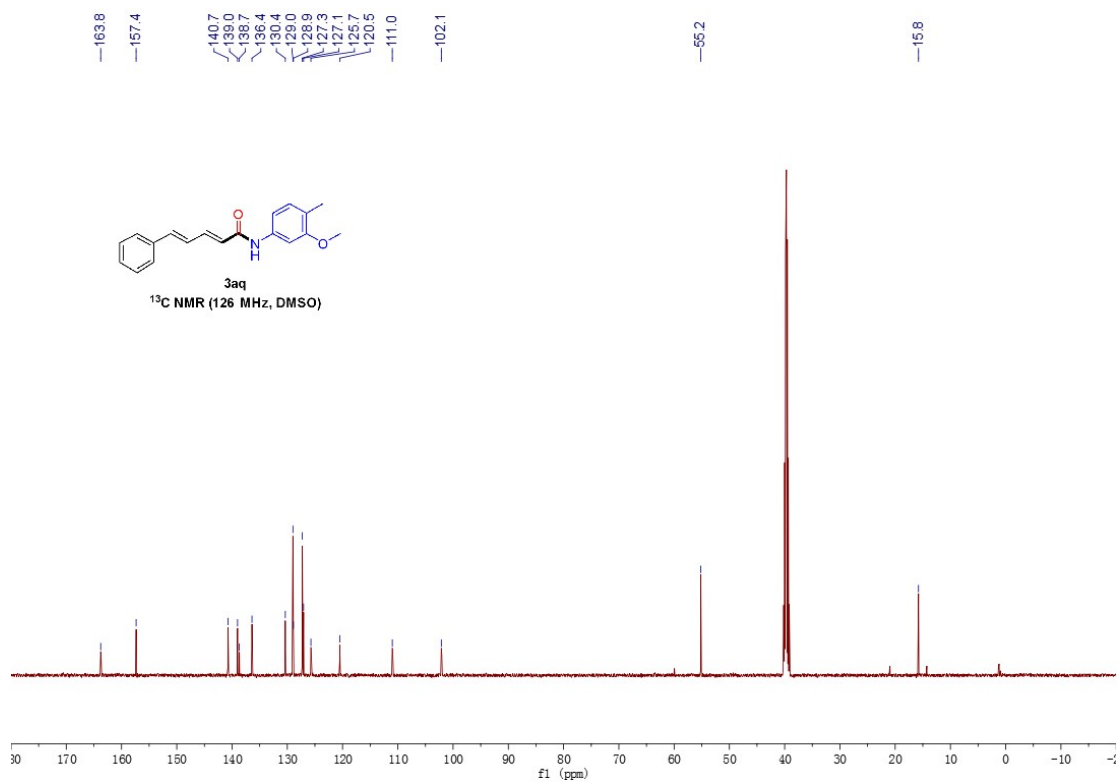

Figure S38. <sup>13</sup>C NMR (126 MHz, DMSO) spectrum of 3aq

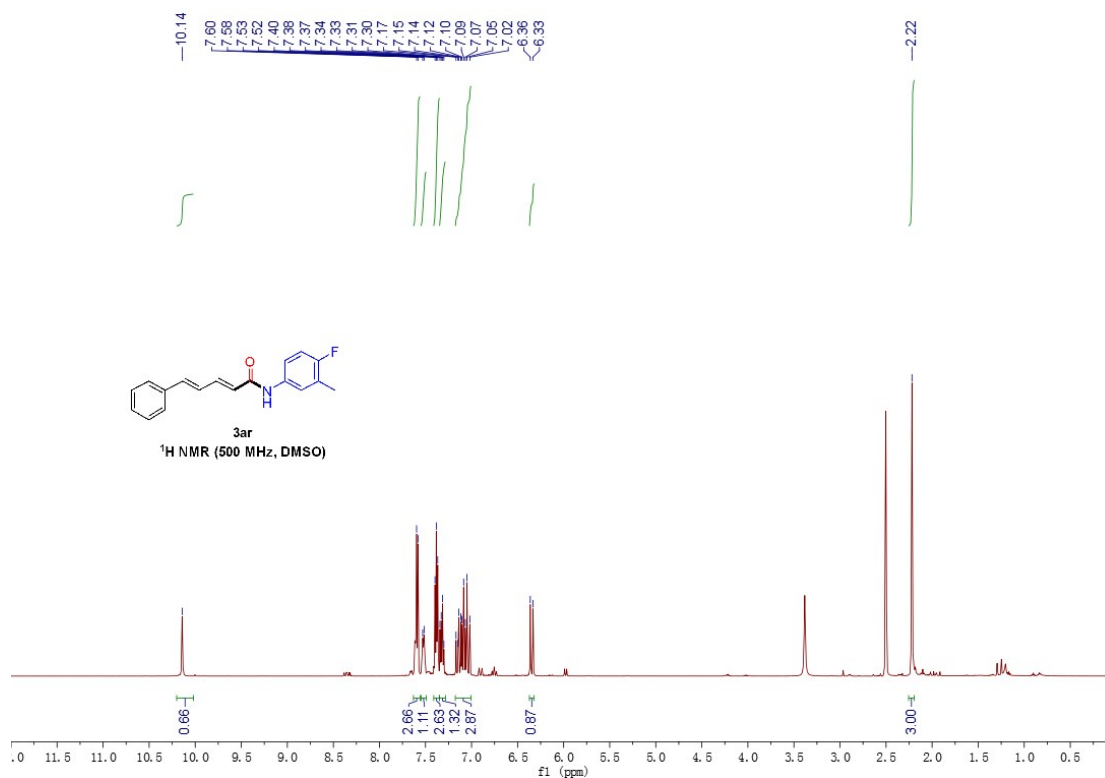

Figure S39. <sup>1</sup>H NMR (500 MHz, DMSO) spectrum of 3ar

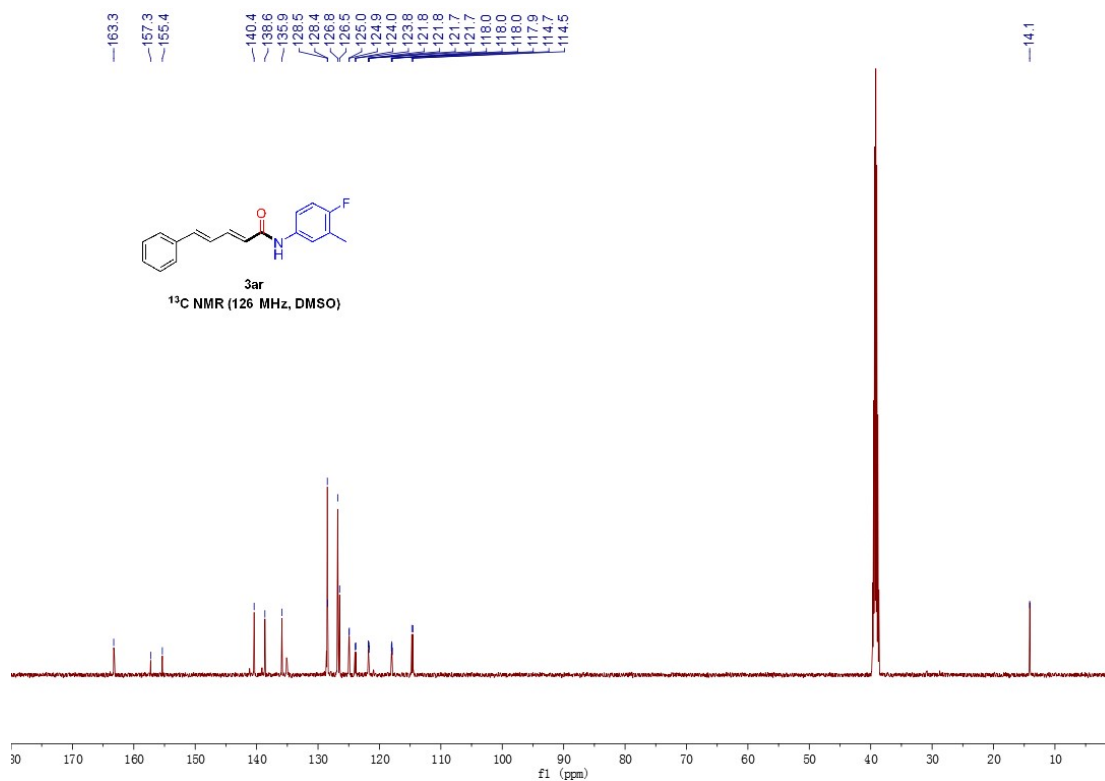

Figure S40. <sup>13</sup>C NMR (126 MHz, DMSO) spectrum of 3ar

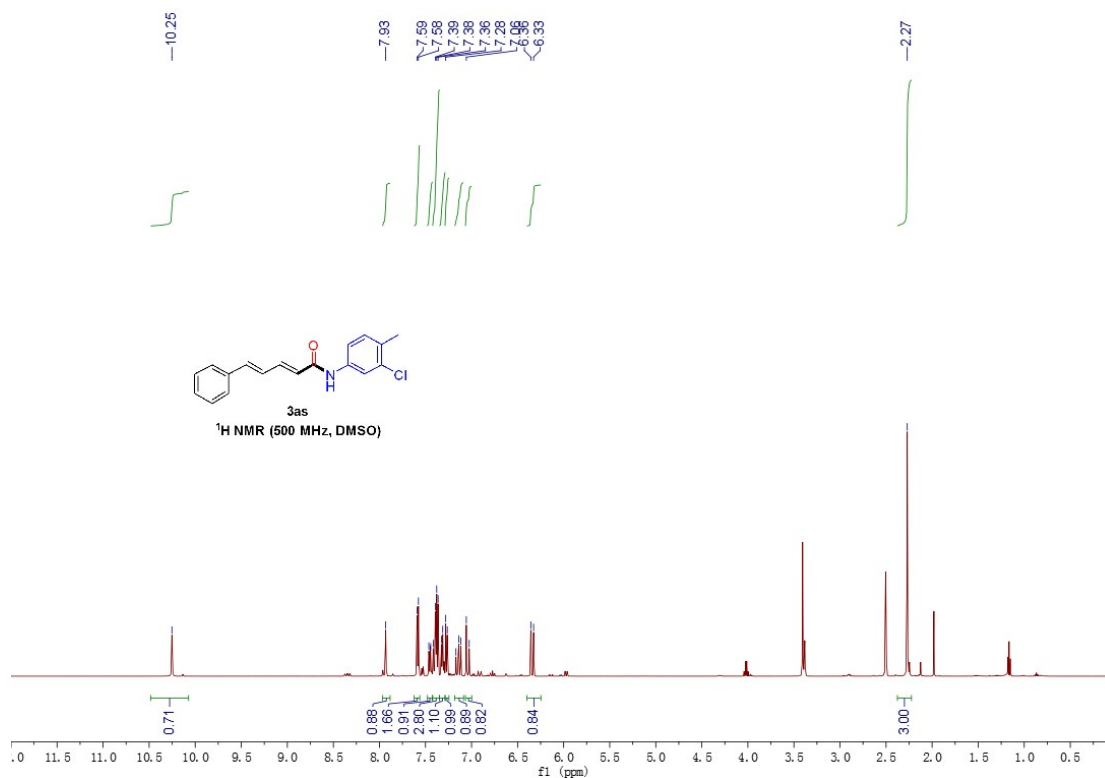

Figure S41. <sup>1</sup>H NMR (500 MHz, DMSO) spectrum of 3as

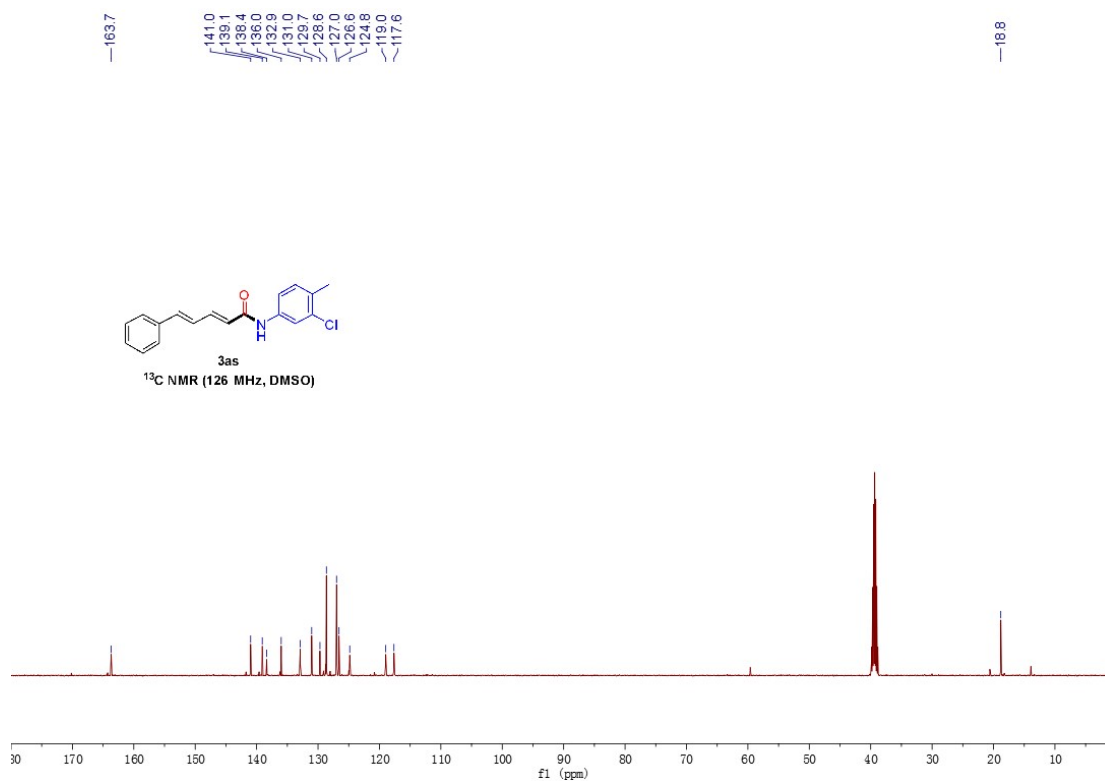

Figure S42. <sup>13</sup>C NMR (126 MHz, DMSO) spectrum of 3as

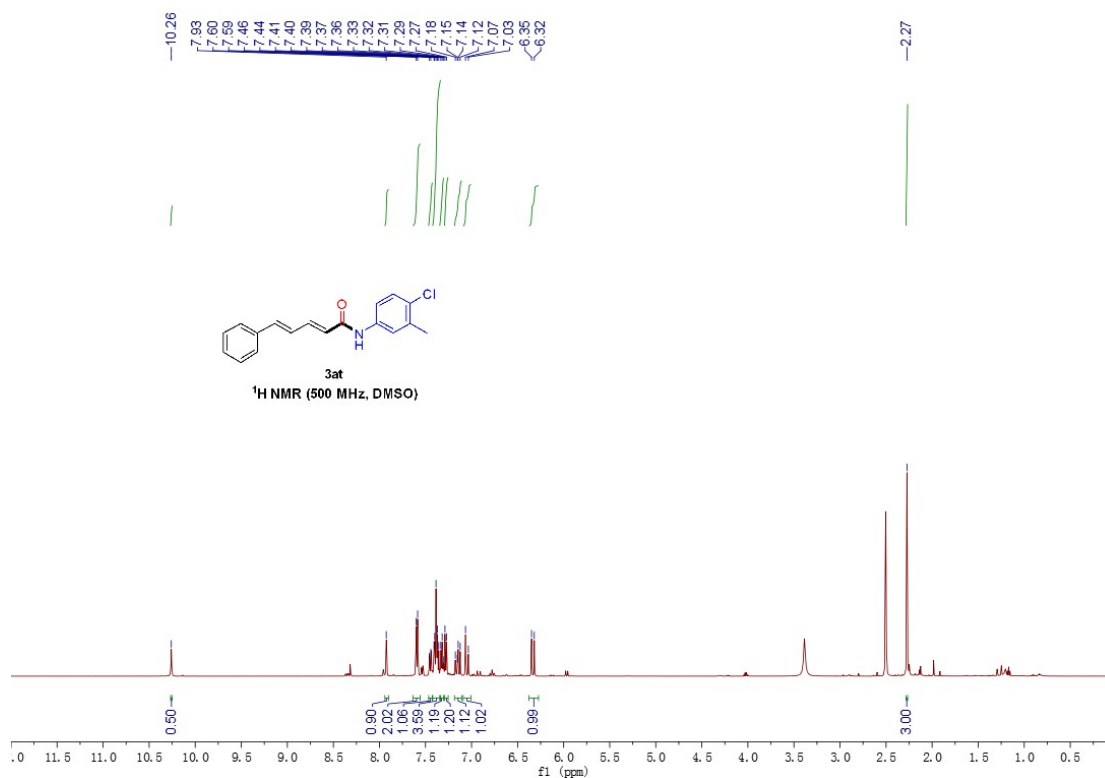

**Figure S43.** <sup>1</sup>H NMR (500 MHz, DMSO) spectrum of **3at**

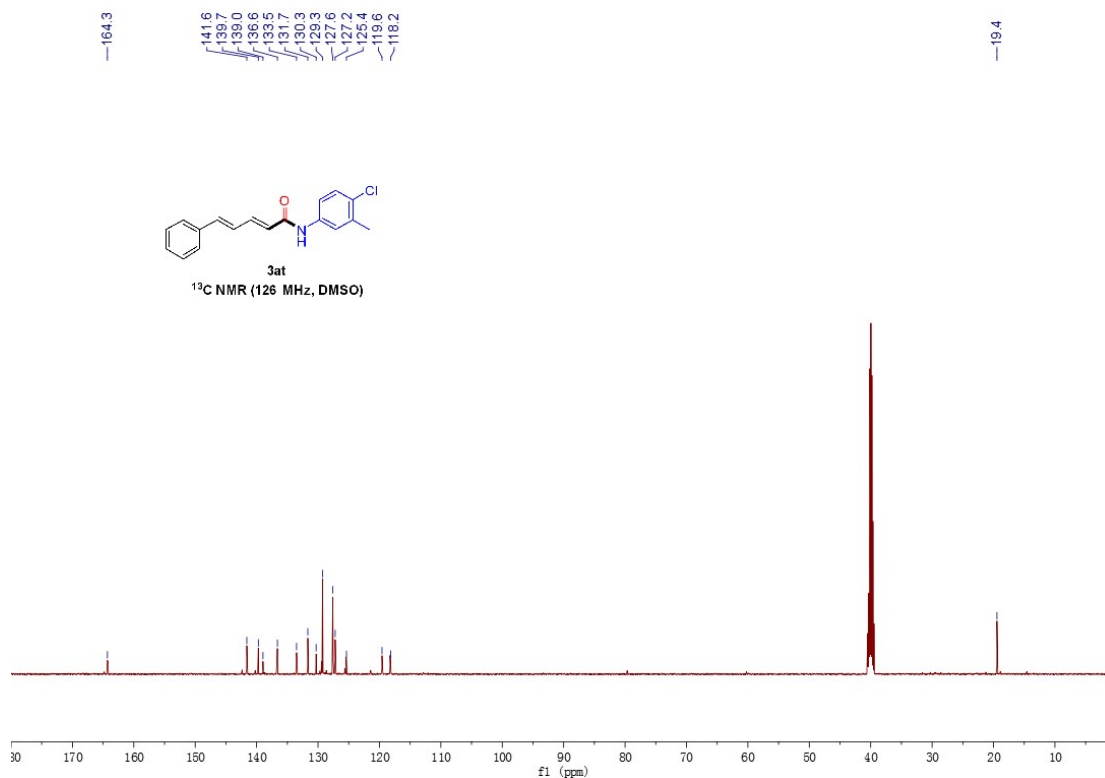

**Figure S44.** <sup>13</sup>C NMR (126 MHz, DMSO) spectrum of **3at**

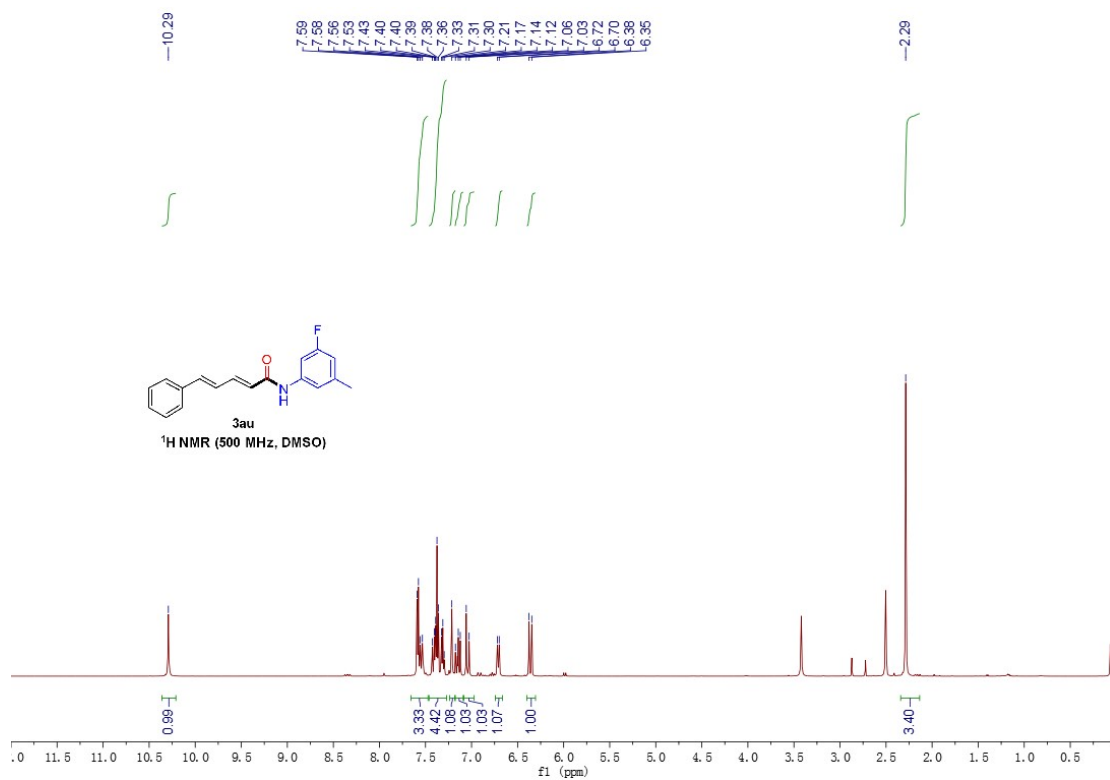

**Figure S45. <sup>1</sup>H NMR (500 MHz, DMSO) spectrum of 3au**

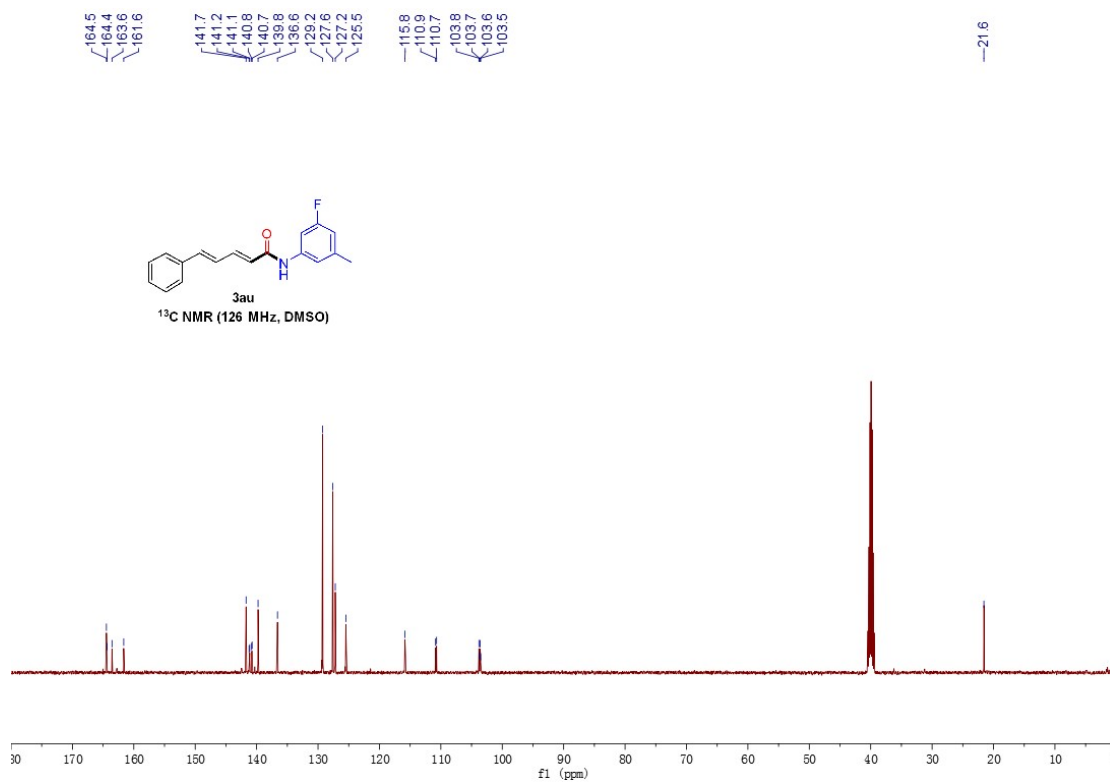

**Figure S46. <sup>13</sup>C NMR (126 MHz, DMSO) spectrum of 3au**

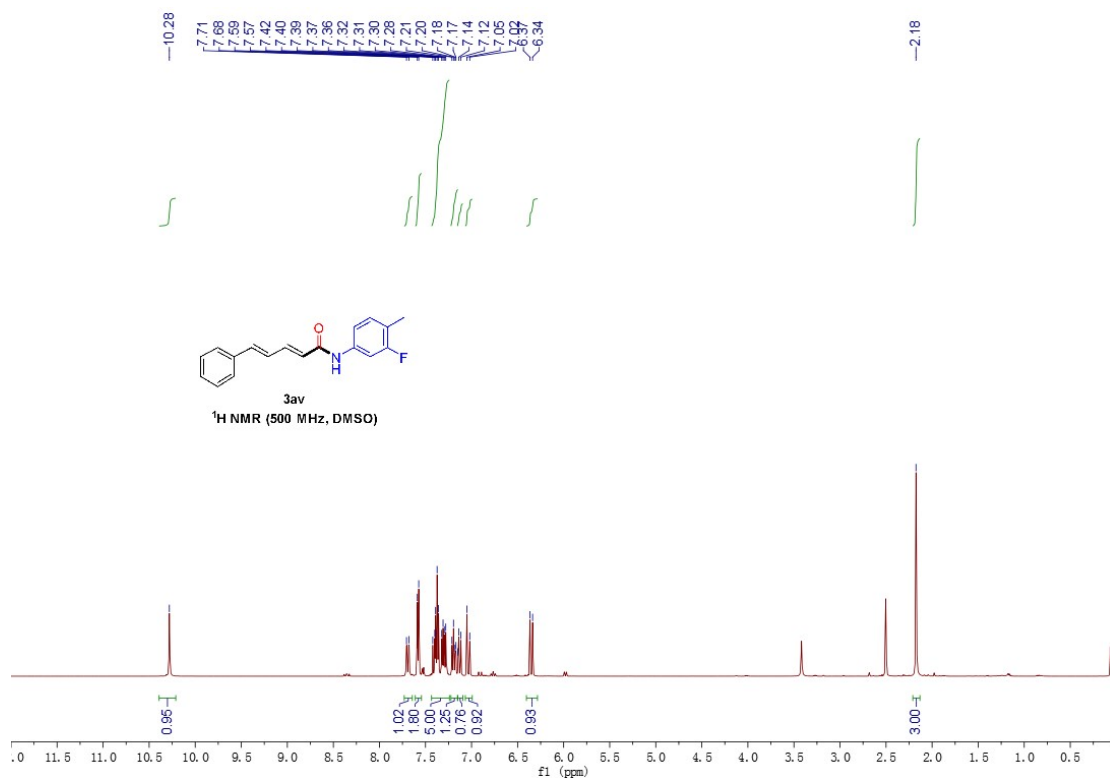

Figure S47. <sup>1</sup>H NMR (500 MHz, DMSO) spectrum of 3av

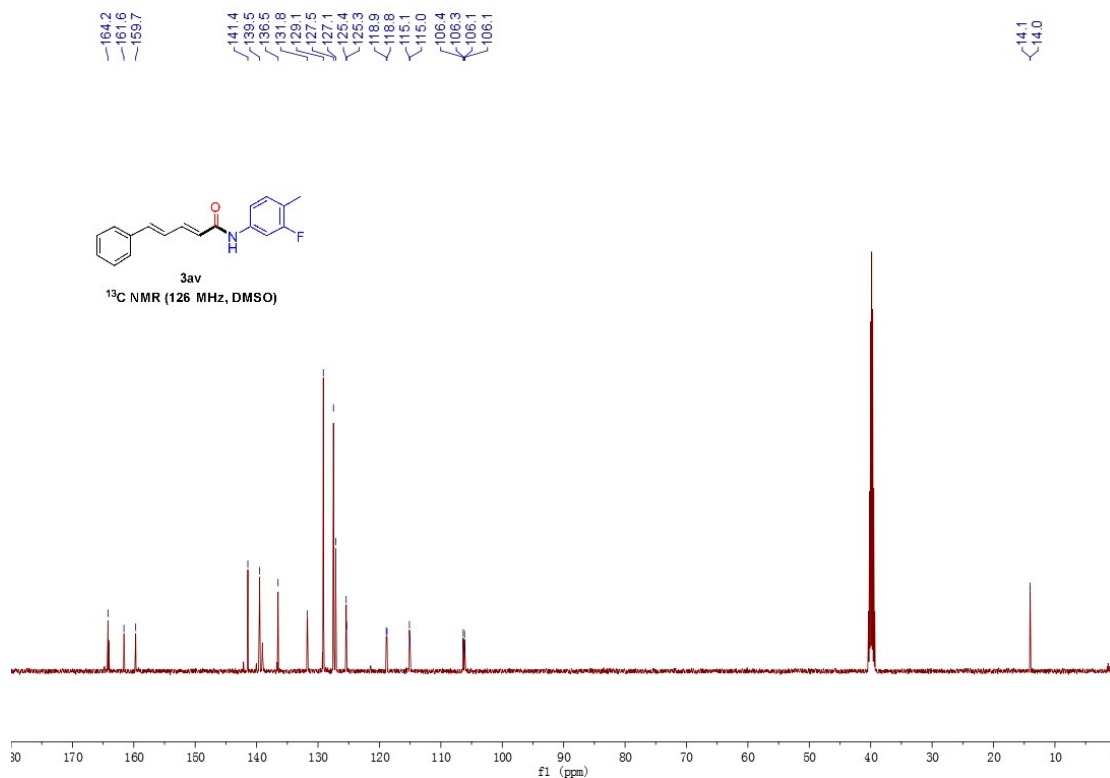

Figure S48. <sup>13</sup>C NMR (126 MHz, DMSO) spectrum of 3av



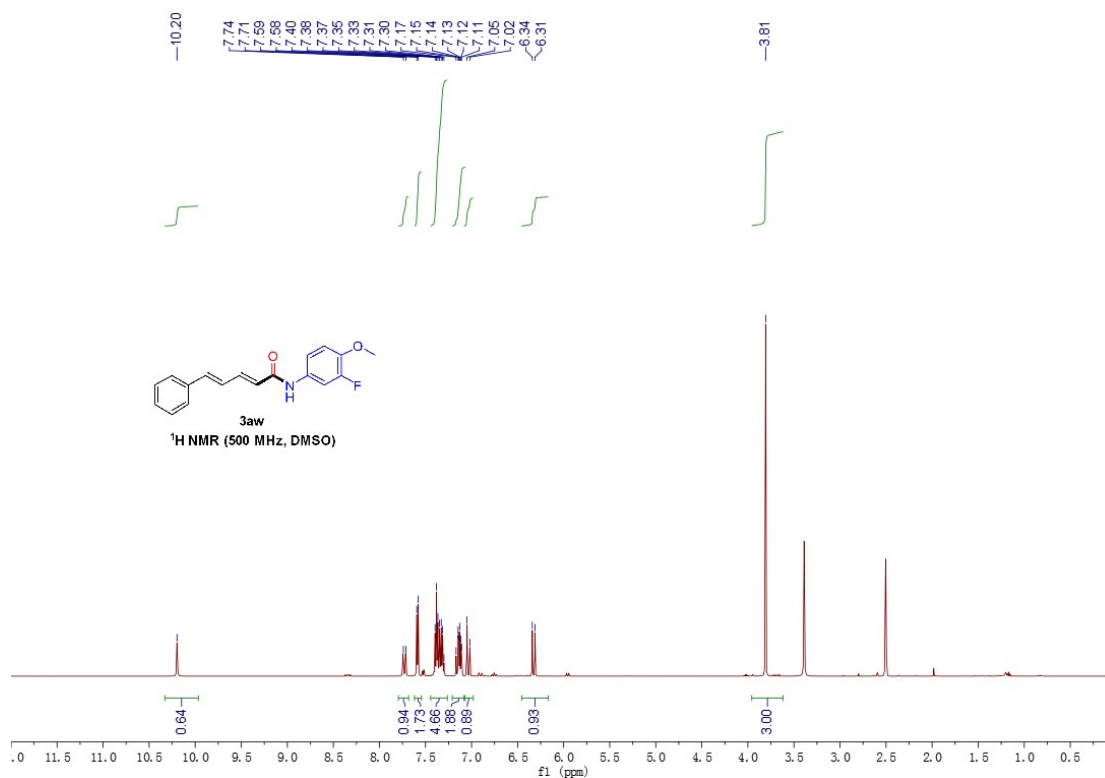

Figure S49. <sup>1</sup>H NMR (500 MHz, DMSO) spectrum of 3aw

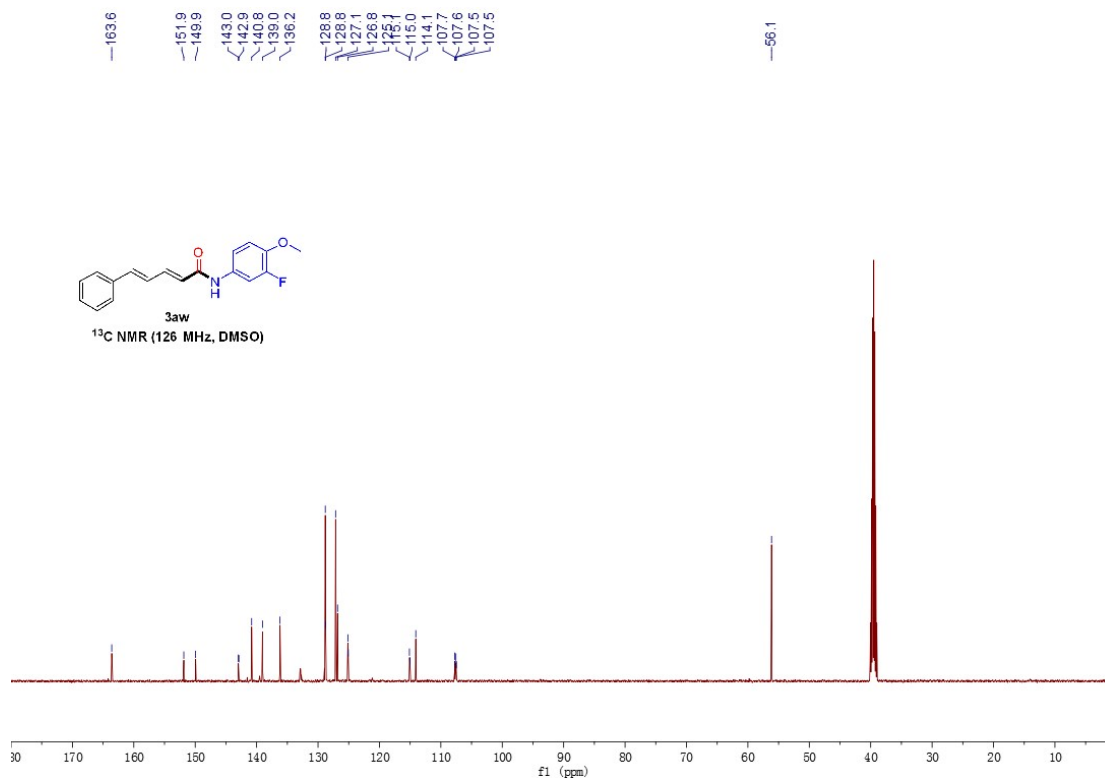

Figure S50. <sup>13</sup>C NMR (126 MHz, DMSO) spectrum of 3aw

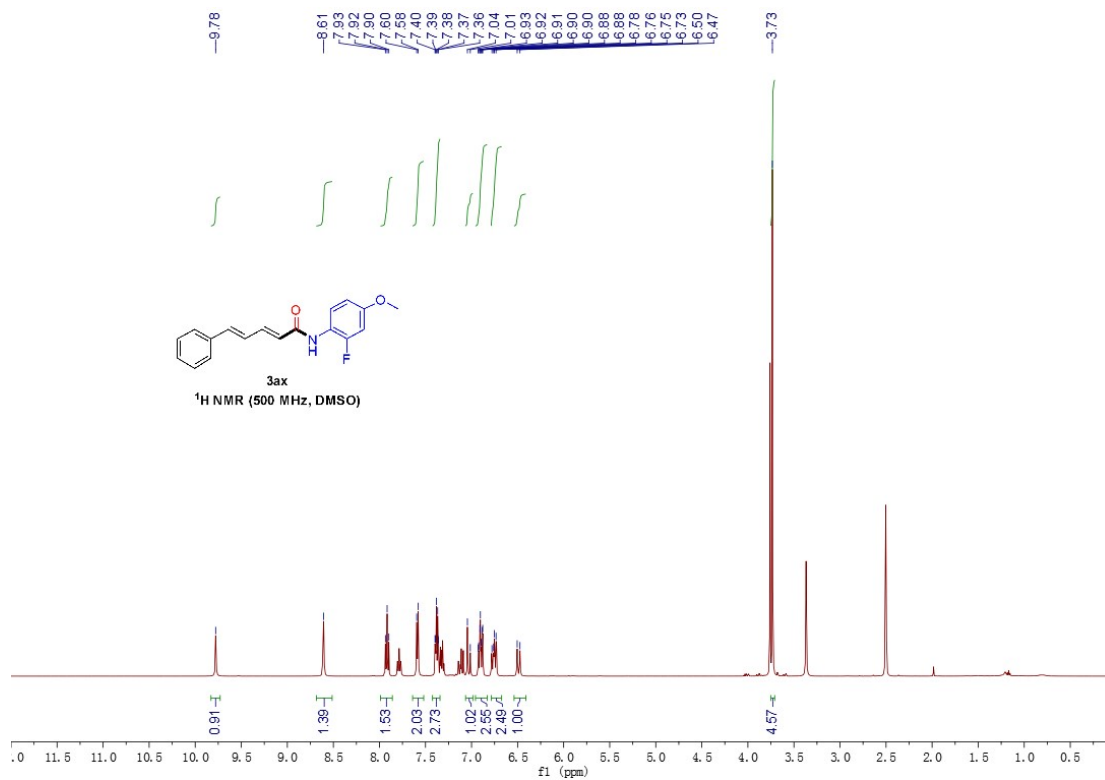

Figure S51. <sup>1</sup>H NMR (500 MHz, DMSO) spectrum of 3ax

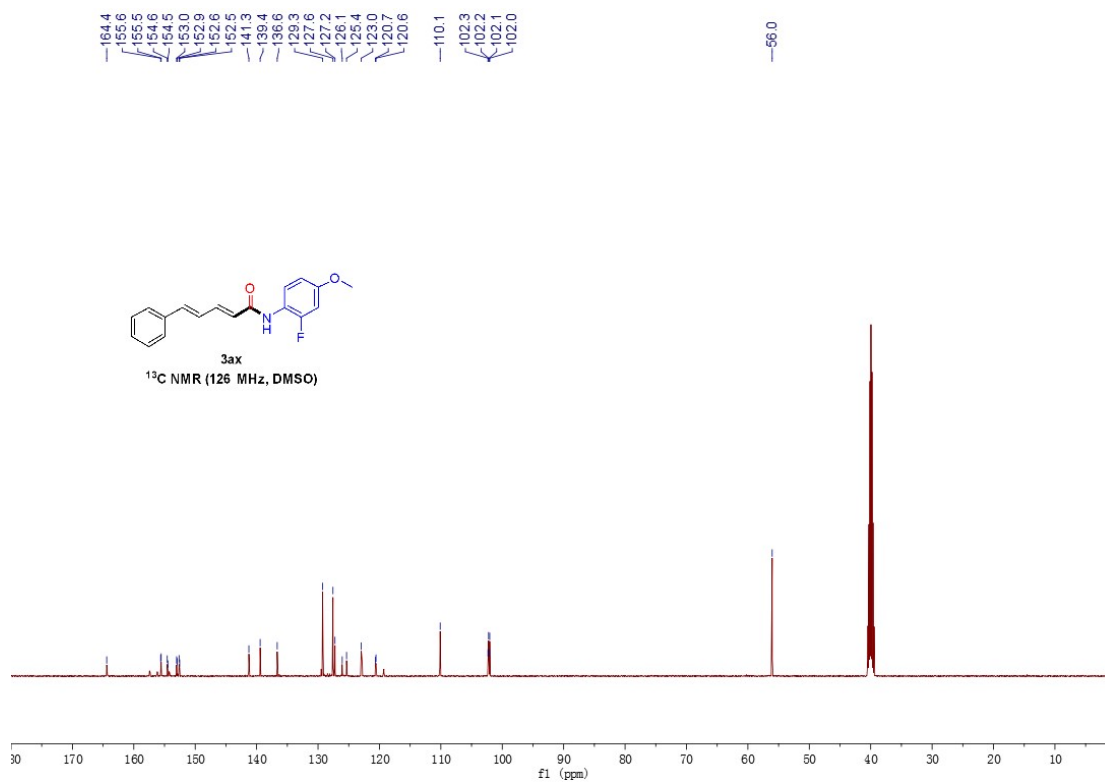

Figure S52. <sup>13</sup>C NMR (126 MHz, DMSO) spectrum of 3ax

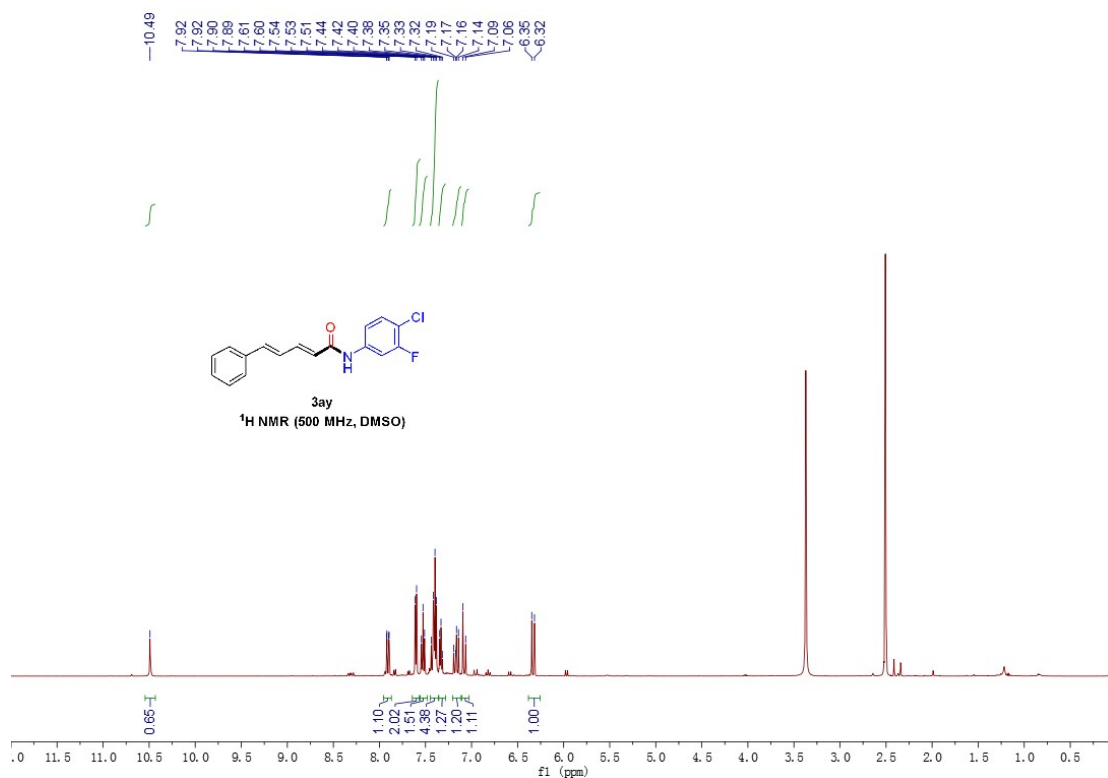

Figure S53. <sup>1</sup>H NMR (500 MHz, DMSO) spectrum of 3ay

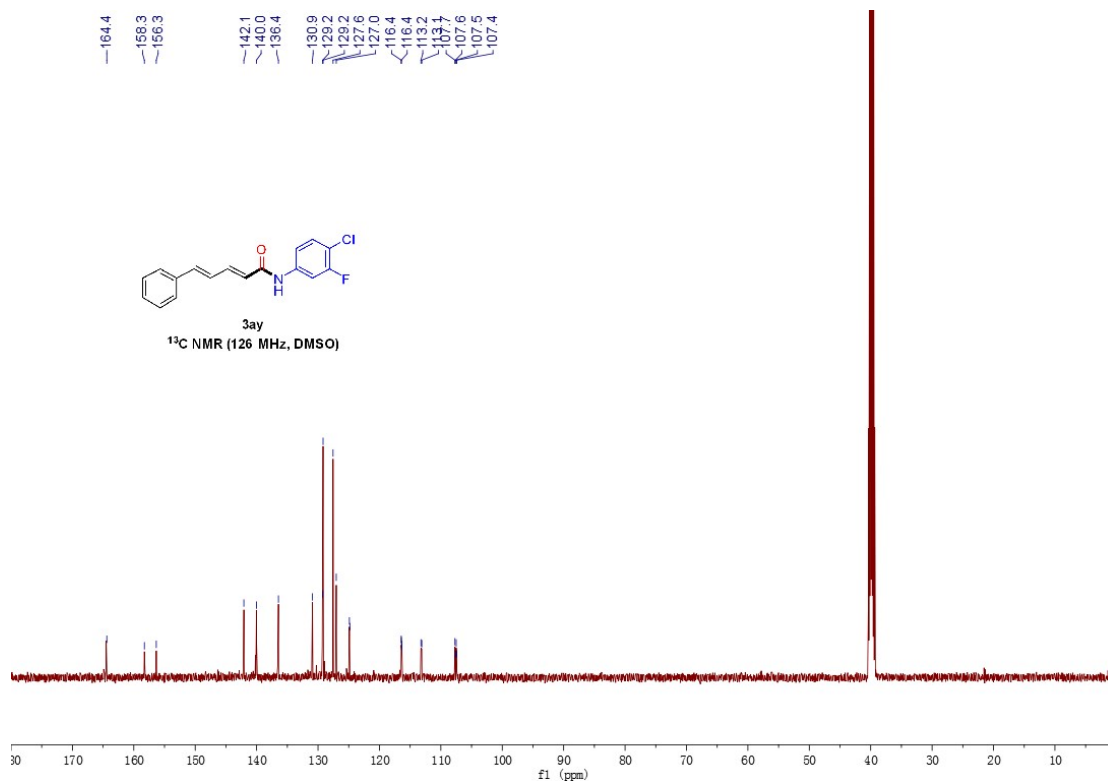

Figure S54. <sup>13</sup>C NMR (126 MHz, DMSO) spectrum of 3ay

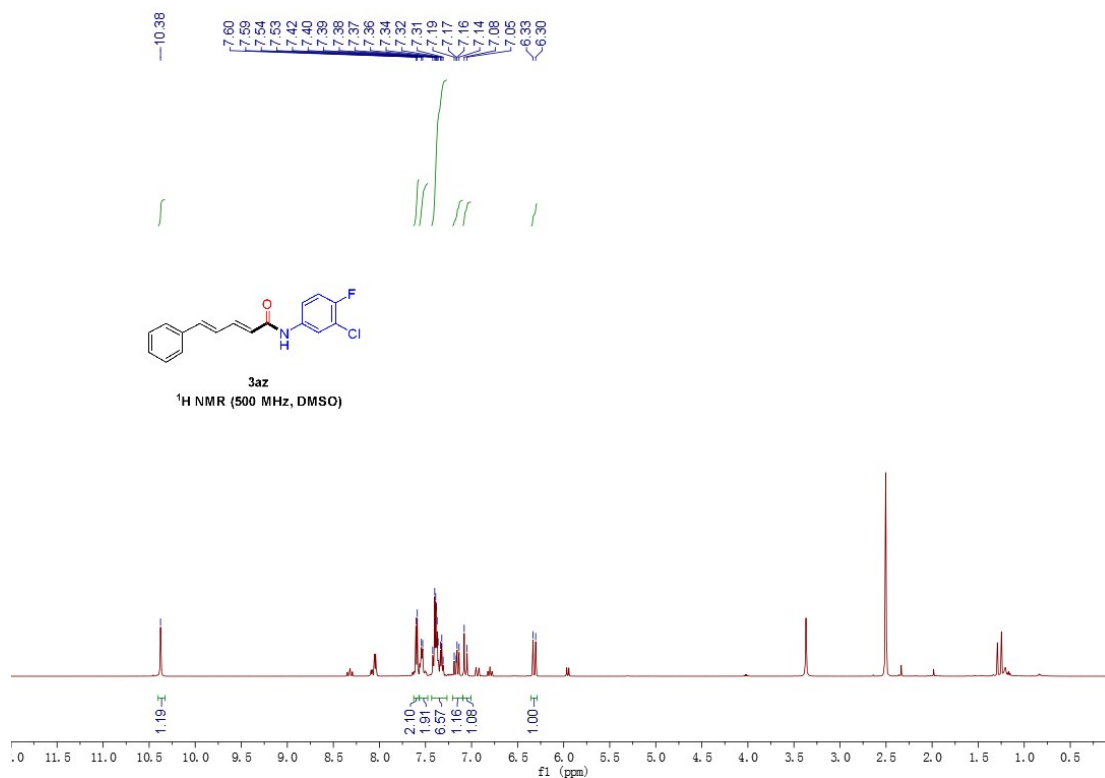

Figure S55. <sup>1</sup>H NMR (500 MHz, DMSO) spectrum of 3az

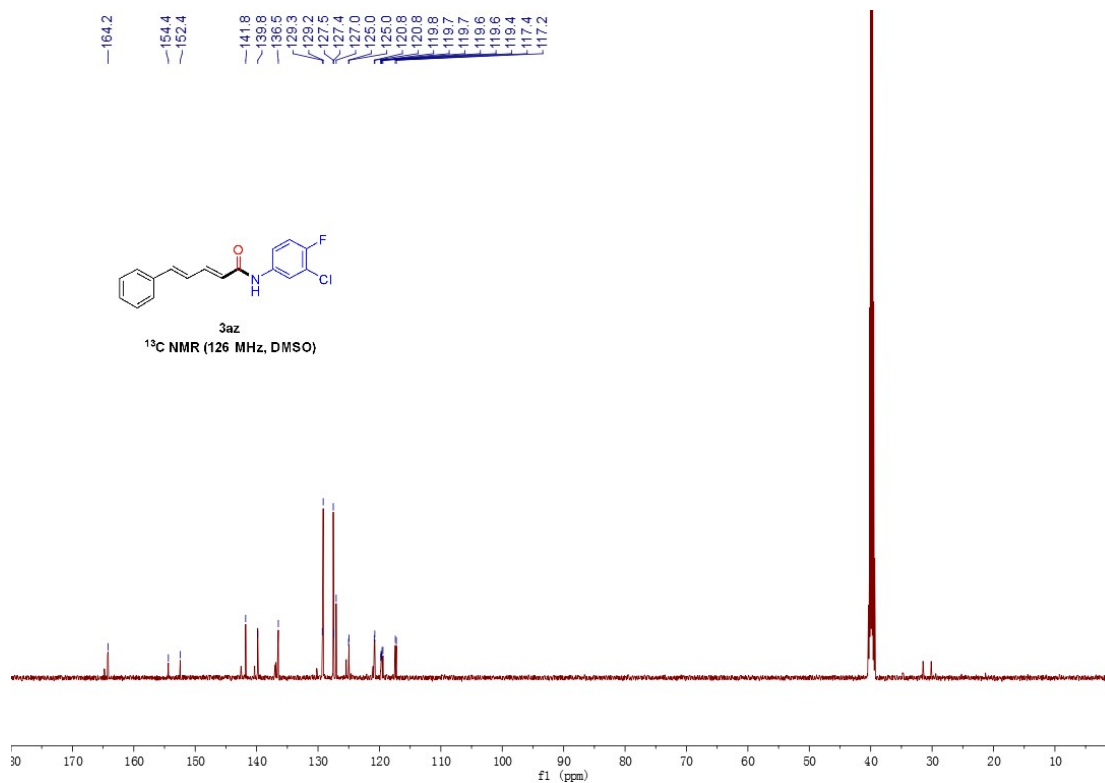

Figure S56. <sup>13</sup>C NMR (126 MHz, DMSO) spectrum of 3az

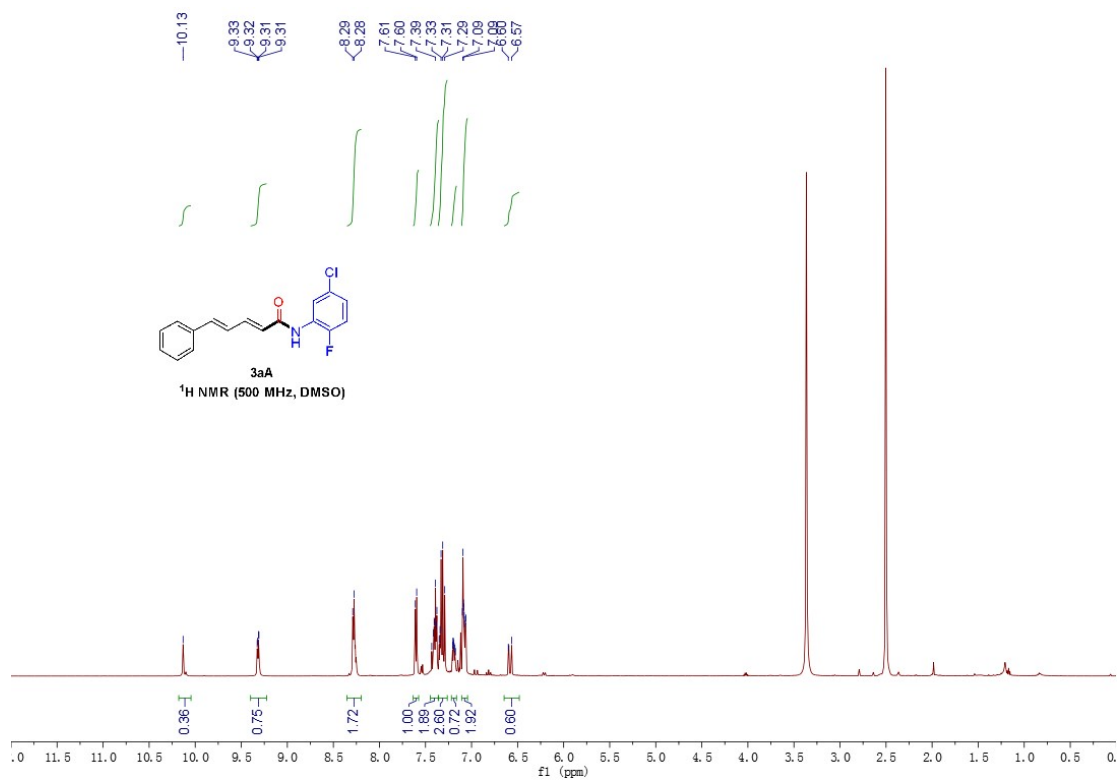

Figure S57. <sup>1</sup>H NMR (500 MHz, DMSO) spectrum of 3aA

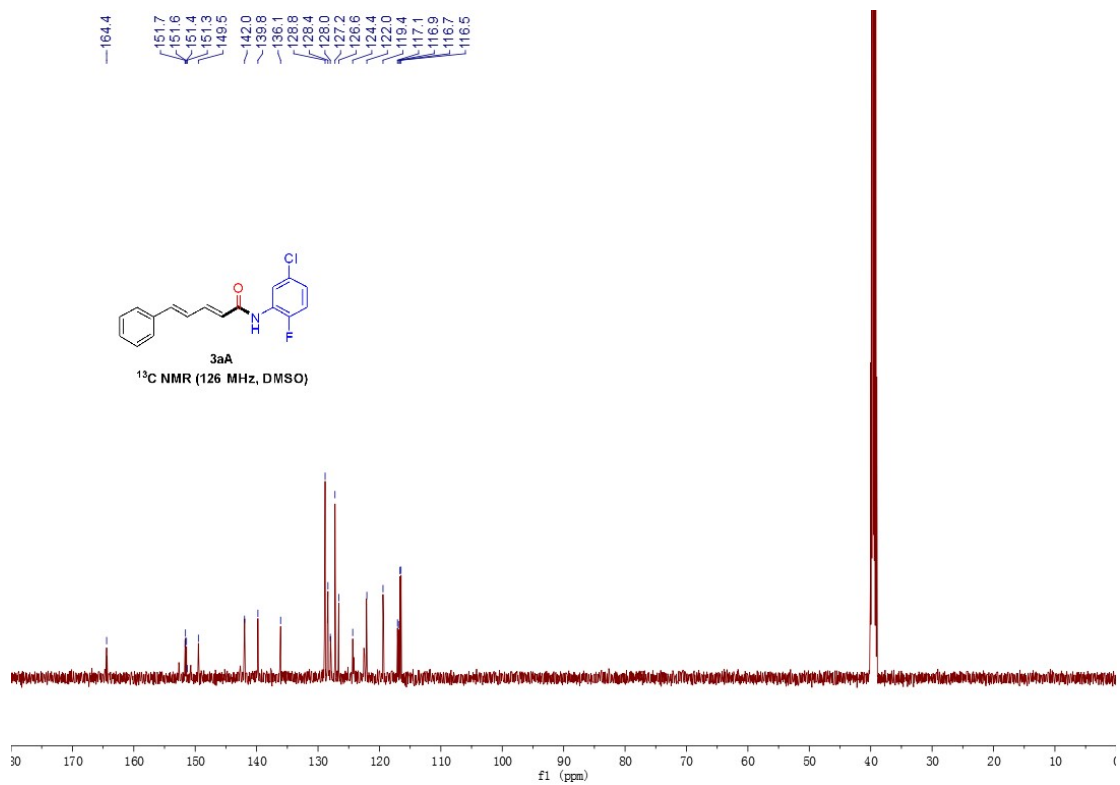

Figure S58. <sup>13</sup>C NMR (126 MHz, DMSO) spectrum of 3aA

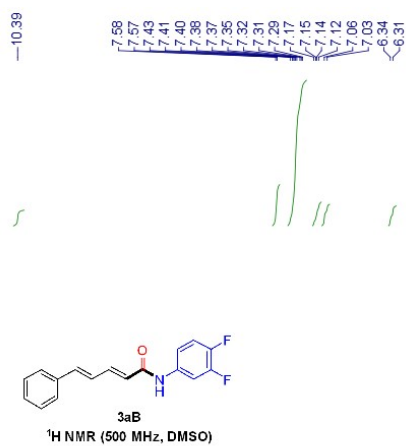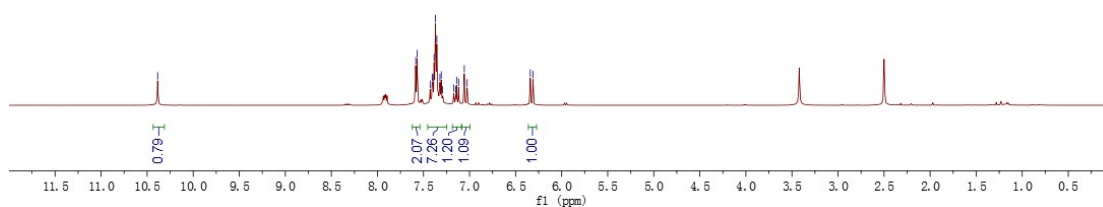

Figure S59. <sup>1</sup>H NMR (500 MHz, DMSO) spectrum of 3aB

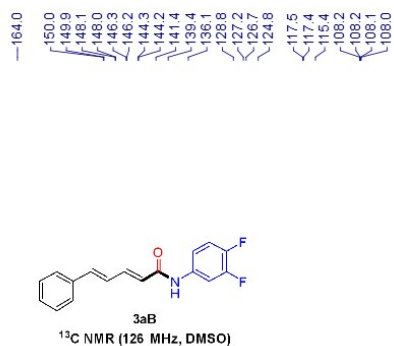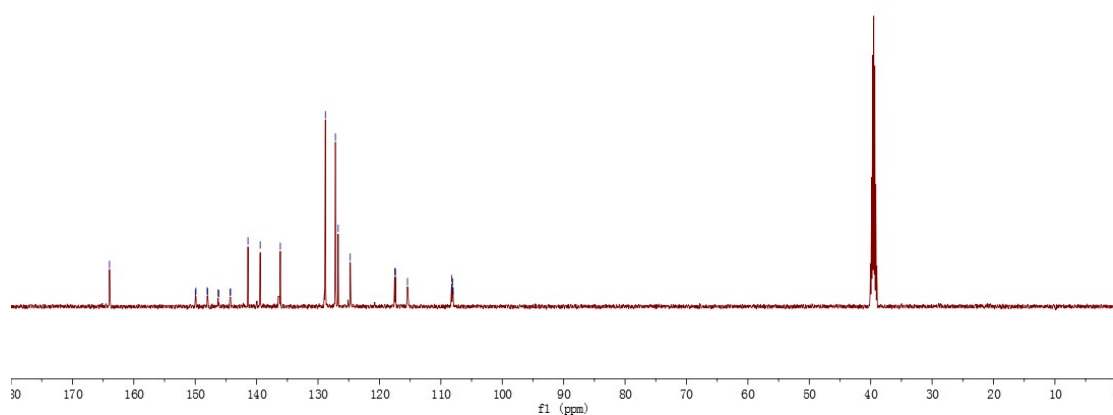

Figure S60. <sup>13</sup>C NMR (126 MHz, DMSO) spectrum of 3aB

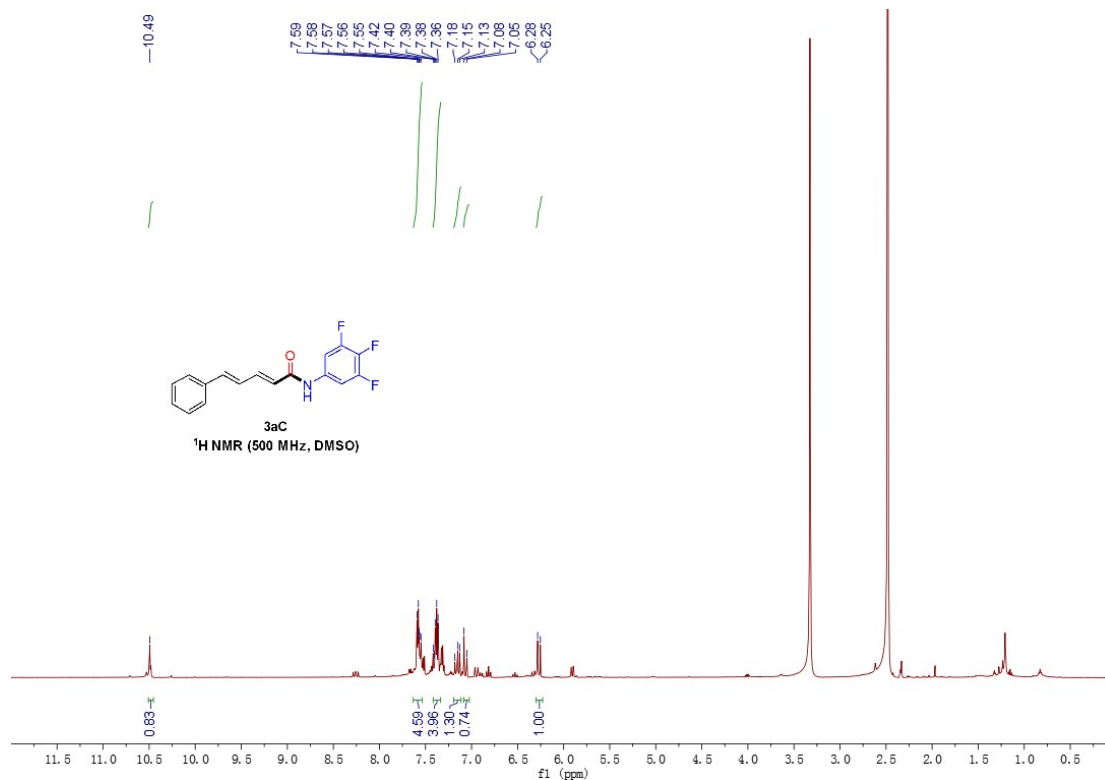

Figure S61. <sup>1</sup>H NMR (500 MHz, DMSO) spectrum of 3aC

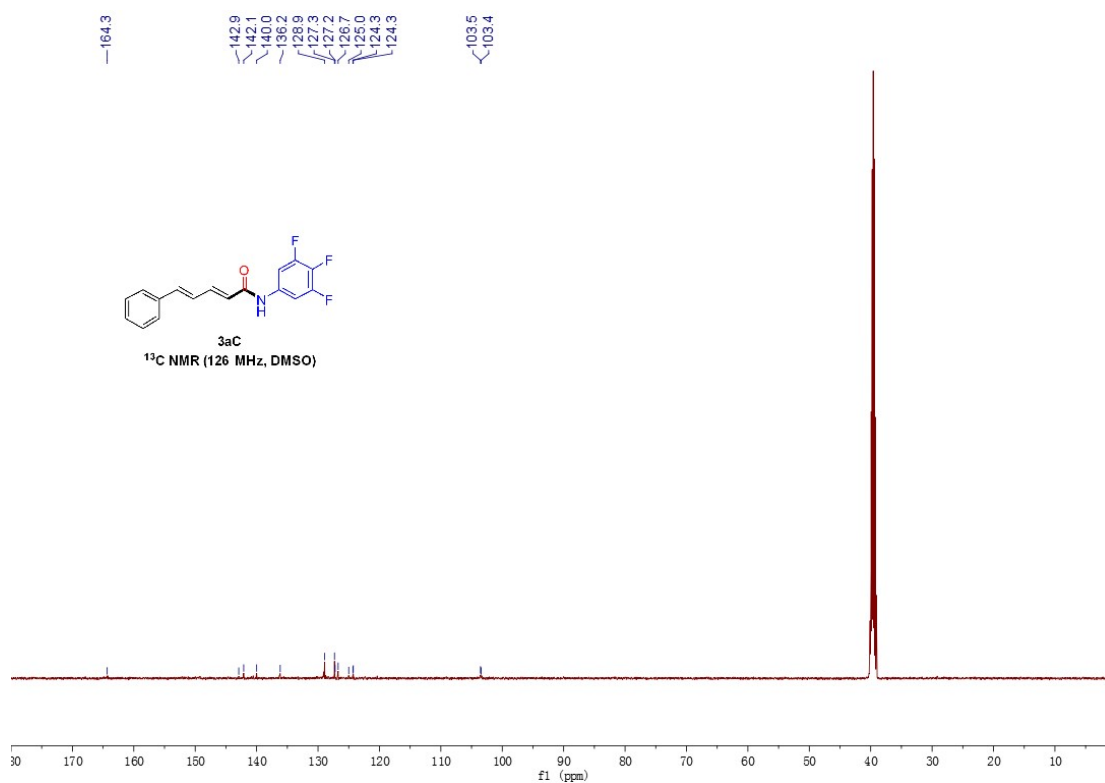

Figure S62. <sup>13</sup>C NMR (126 MHz, DMSO) spectrum of 3aC

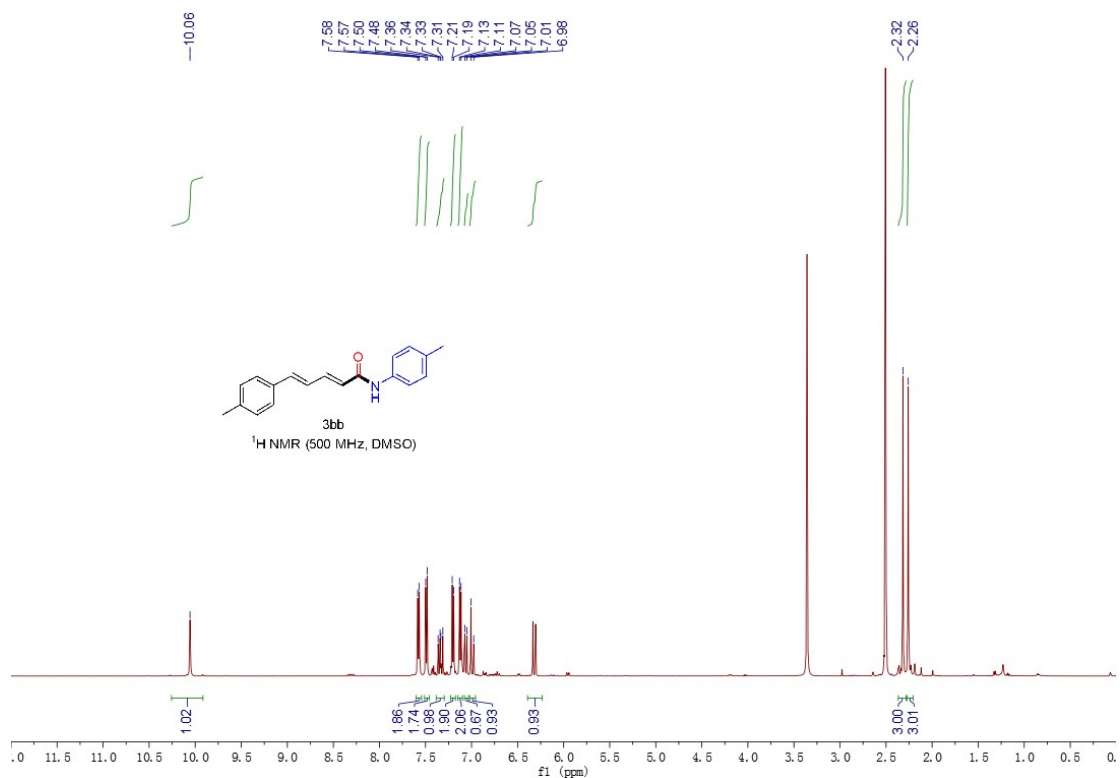

Figure S63. <sup>1</sup>H NMR (500 MHz, DMSO) spectrum of 3bb

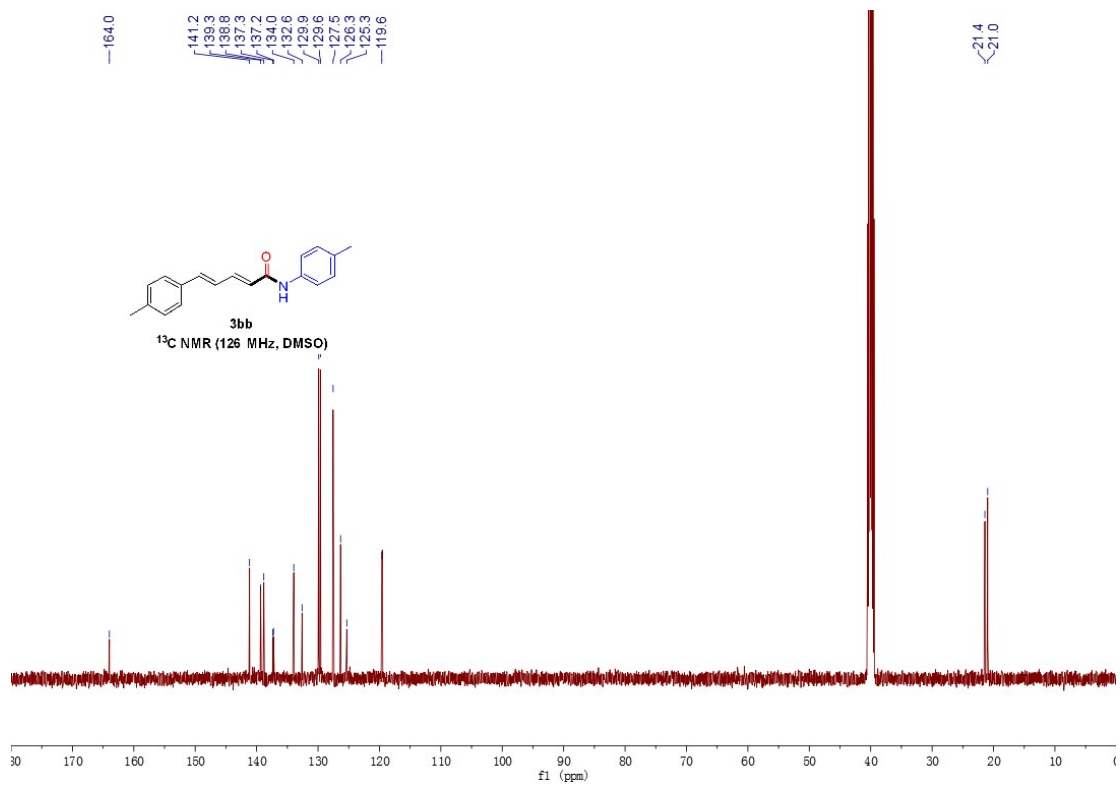

Figure S64. <sup>13</sup>C NMR (126 MHz, DMSO) spectrum of 3bb



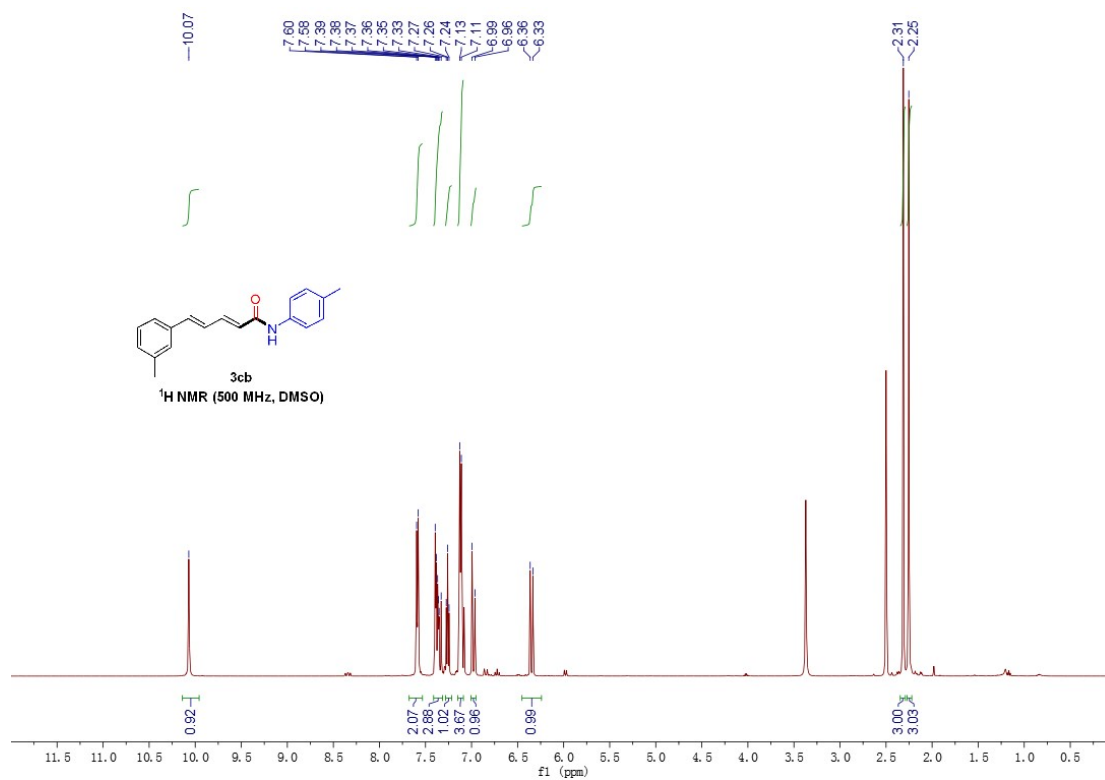

Figure S65. <sup>1</sup>H NMR (500 MHz, DMSO) spectrum of 3cb

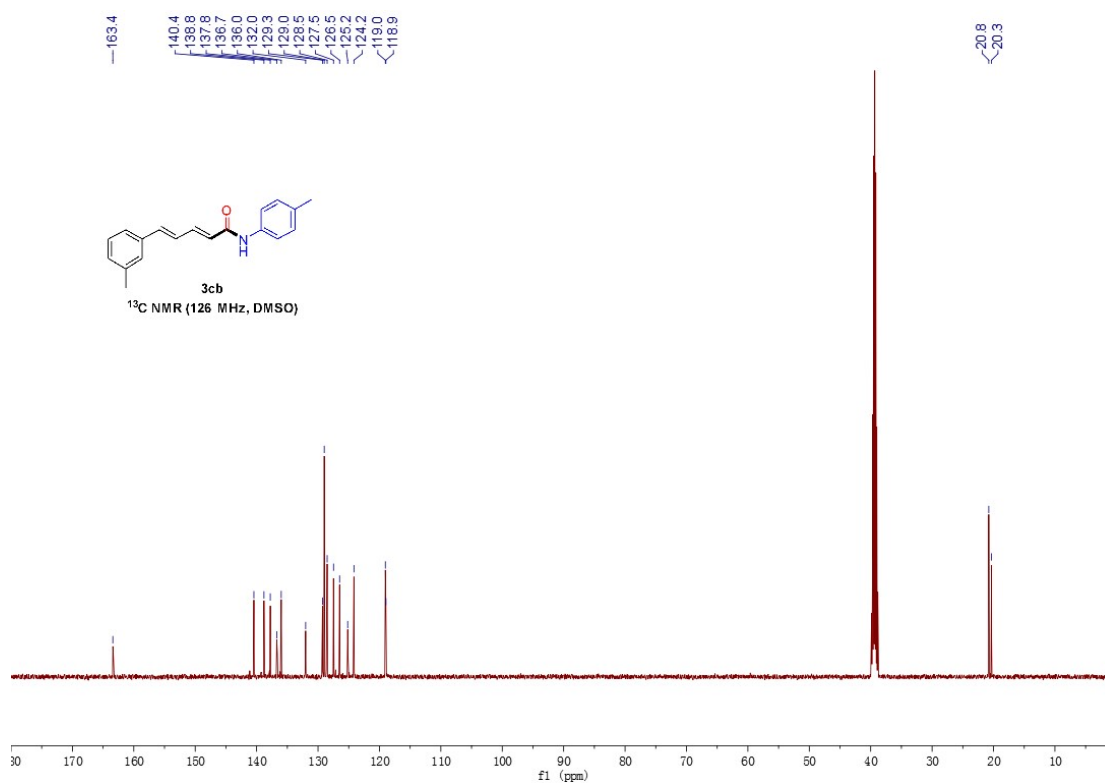

Figure S66. <sup>13</sup>C NMR (126 MHz, DMSO) spectrum of 3cb

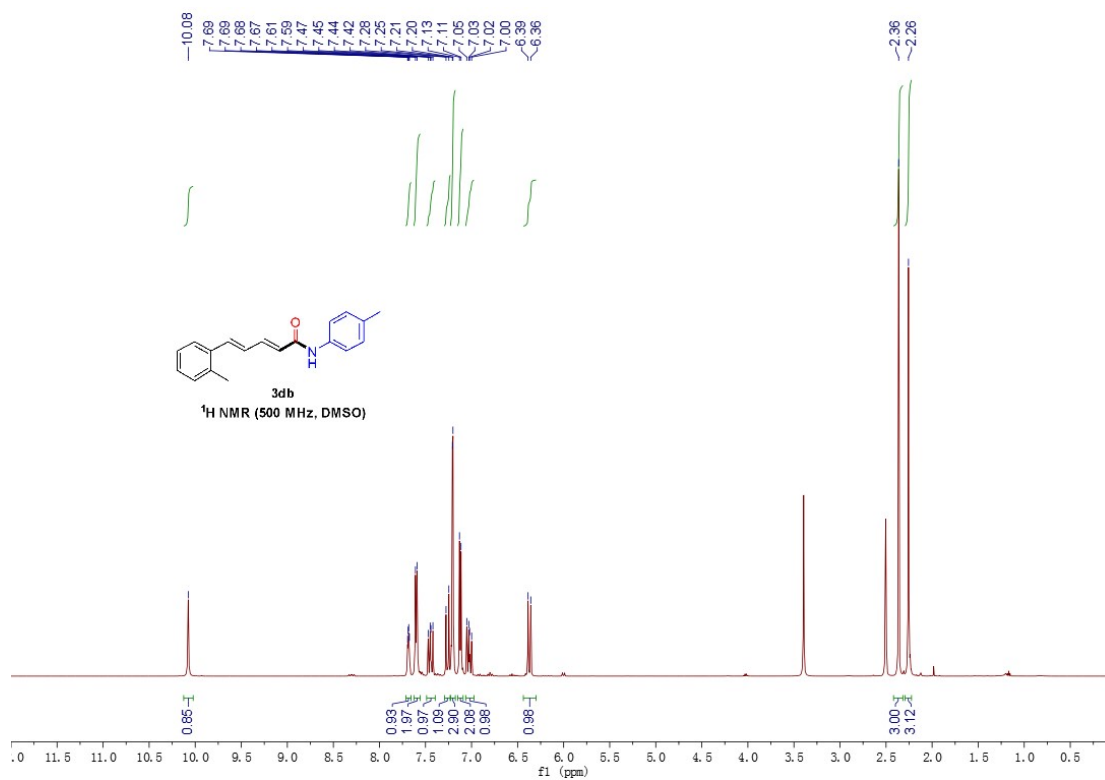

Figure S67. <sup>1</sup>H NMR (500 MHz, DMSO) spectrum of **3db**

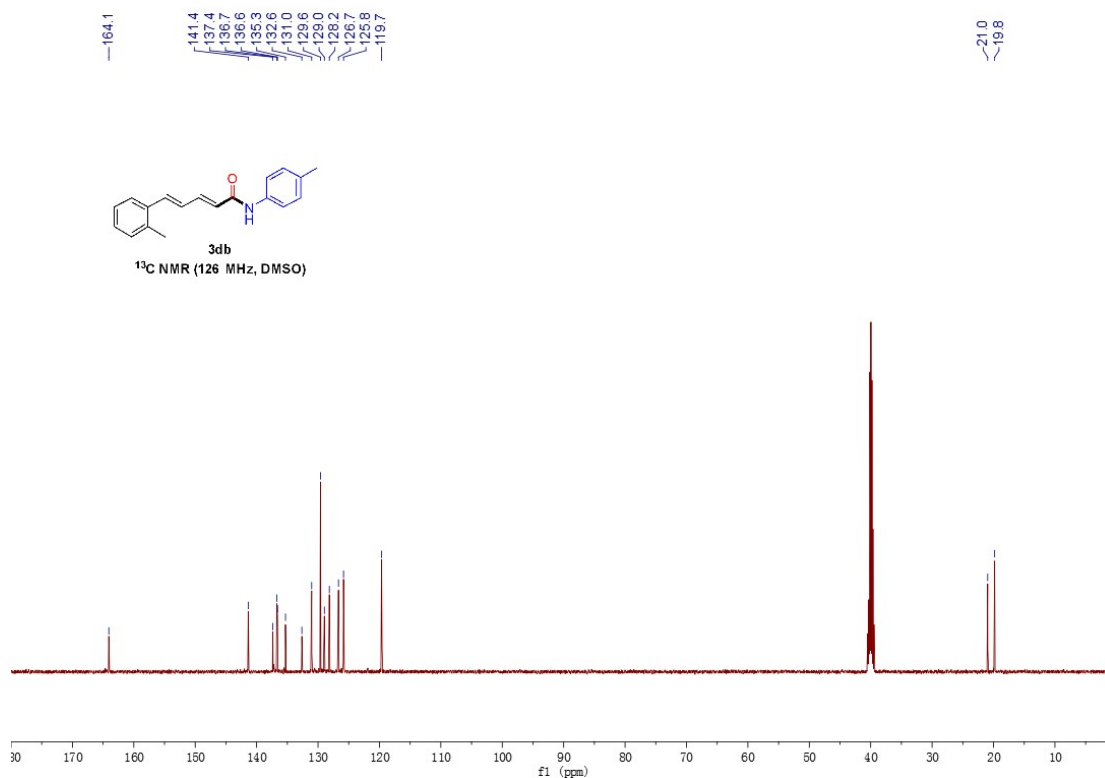

Figure S68. <sup>13</sup>C NMR (126 MHz, DMSO) spectrum of **3db**

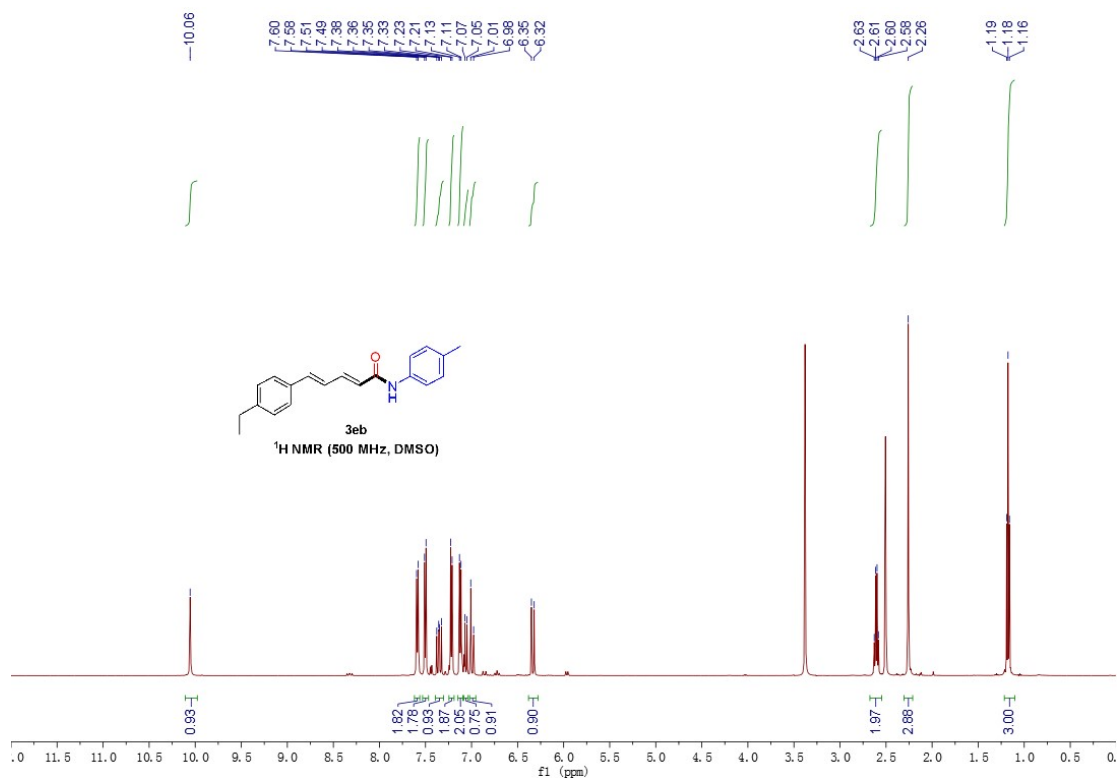

Figure S69. <sup>1</sup>H NMR (500 MHz, DMSO) spectrum of 3eb

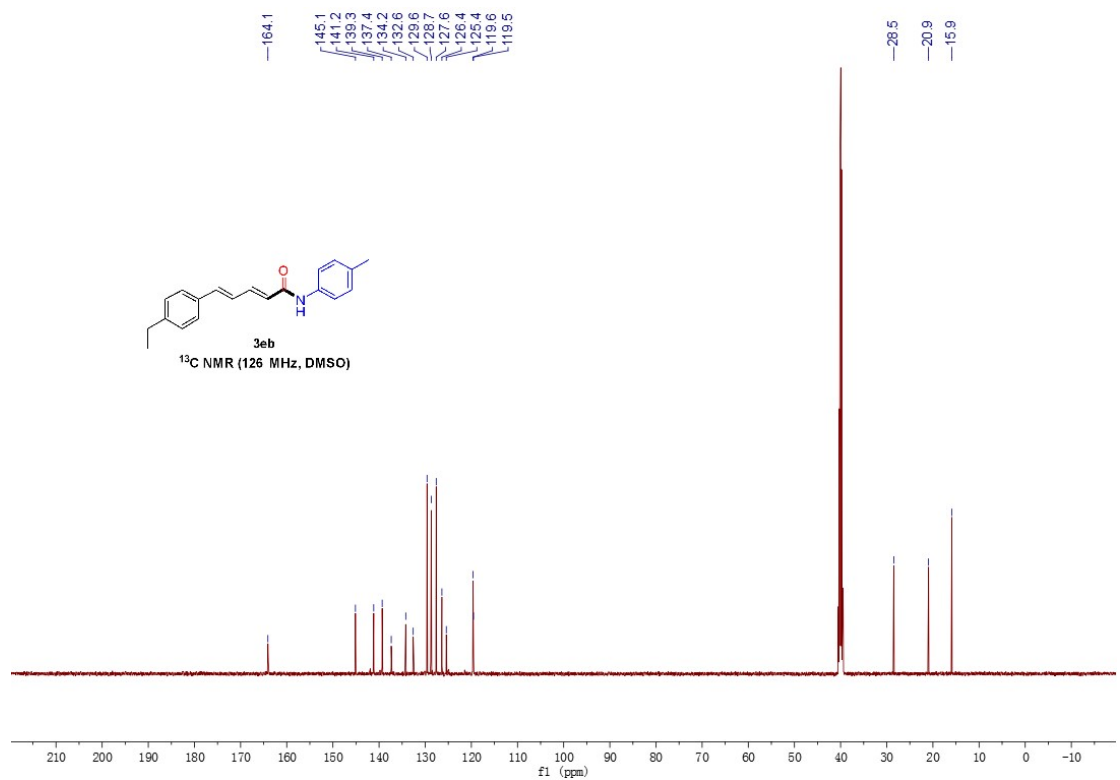

Figure S70. <sup>13</sup>C NMR (126 MHz, DMSO) spectrum of 3eb

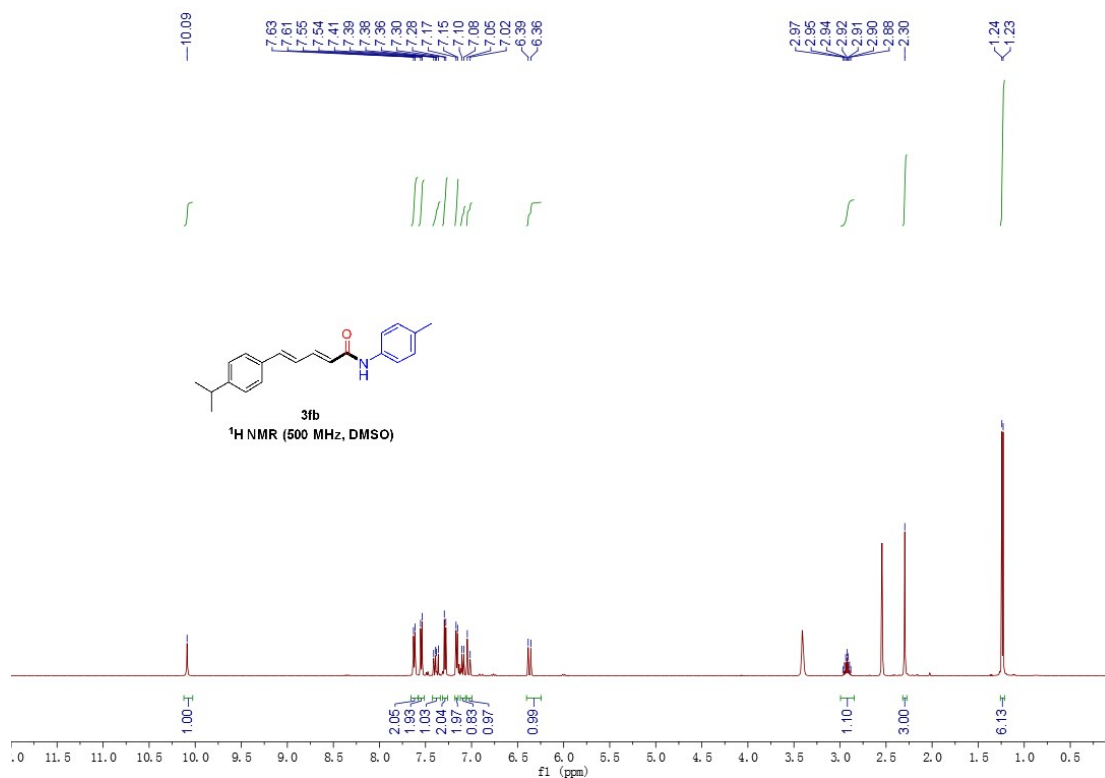

Figure S71. <sup>1</sup>H NMR (500 MHz, DMSO) spectrum of 3fb

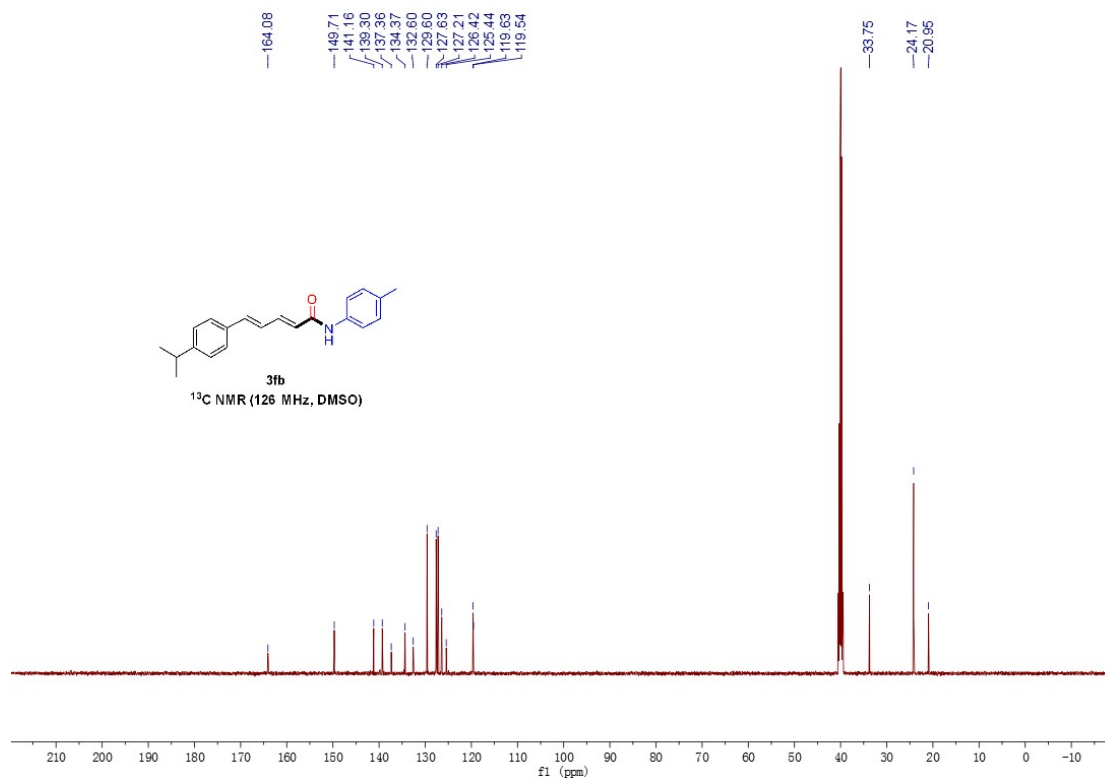

Figure S72. <sup>13</sup>C NMR (126 MHz, DMSO) spectrum of 3fb

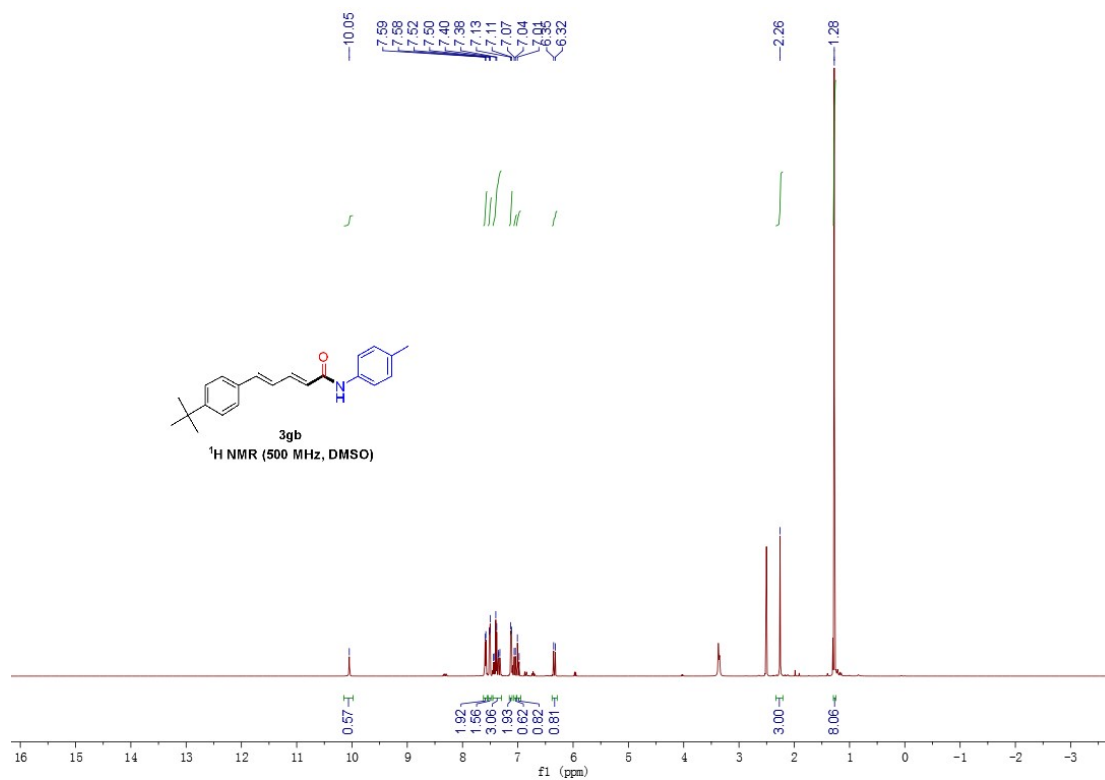

Figure S73. <sup>1</sup>H NMR (500 MHz, DMSO) spectrum of 3gb

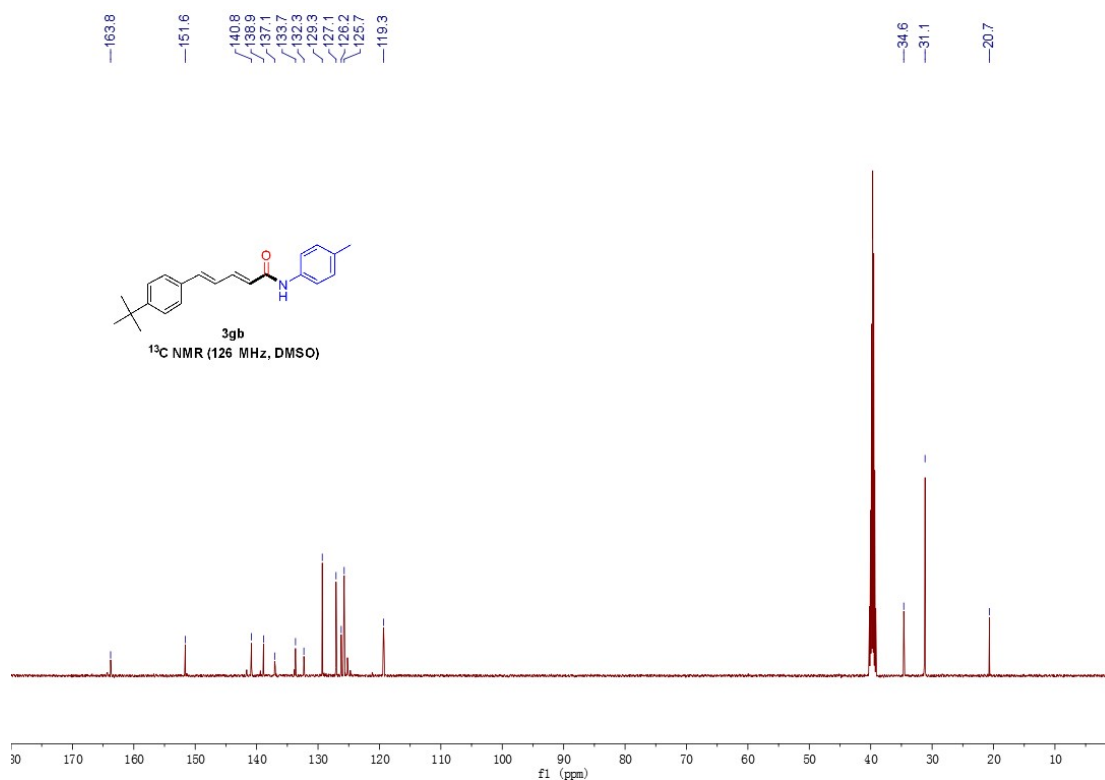

Figure S74. <sup>13</sup>C NMR (126 MHz, DMSO) spectrum of 3gb

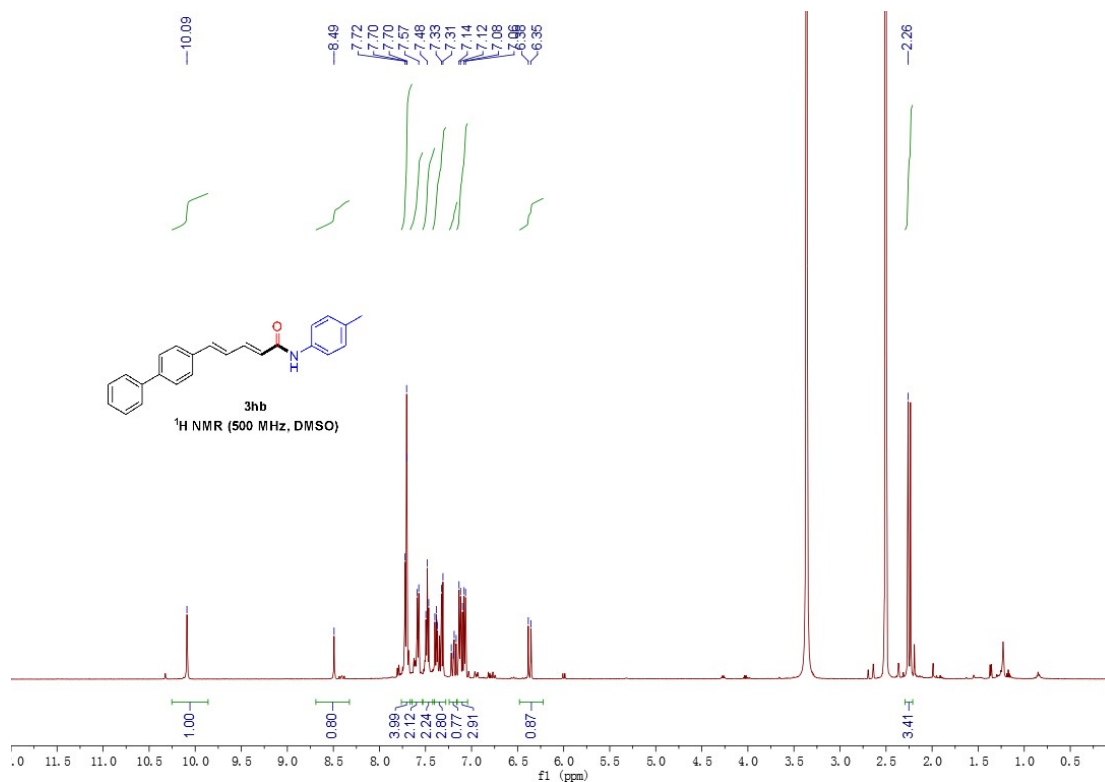

Figure S75. <sup>1</sup>H NMR (500 MHz, DMSO) spectrum of 3hb

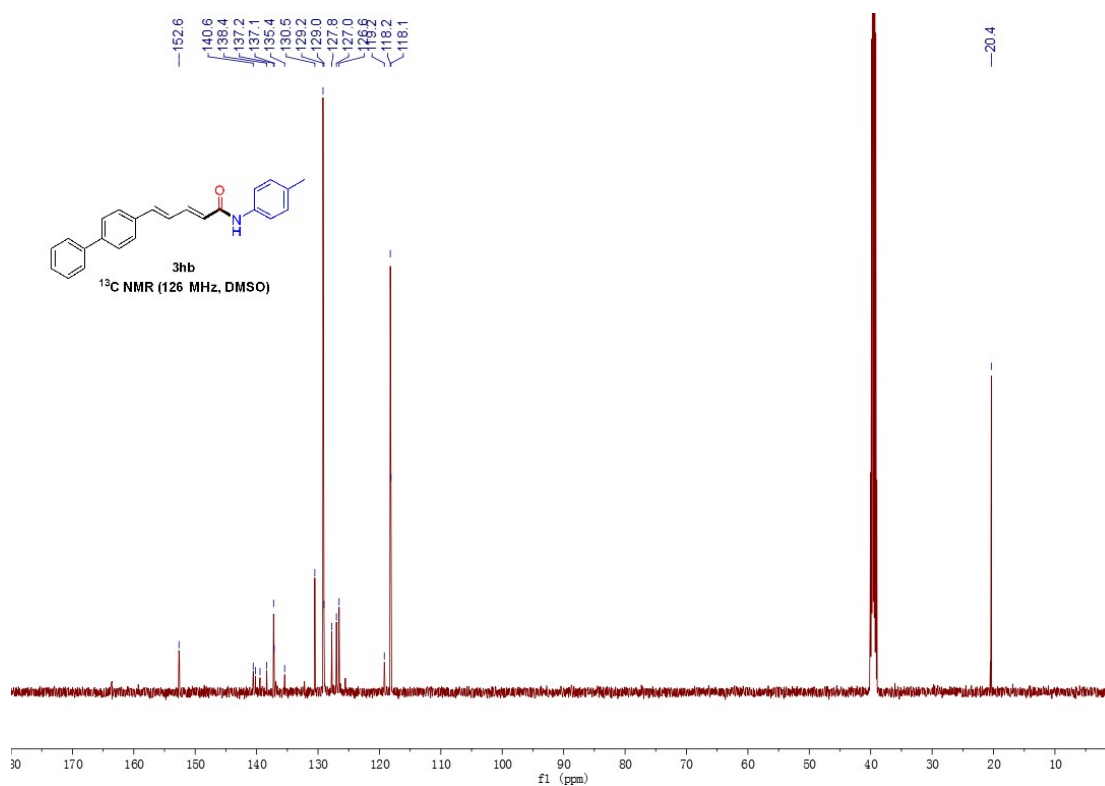

Figure S76. <sup>13</sup>C NMR (126 MHz, DMSO) spectrum of 3hb

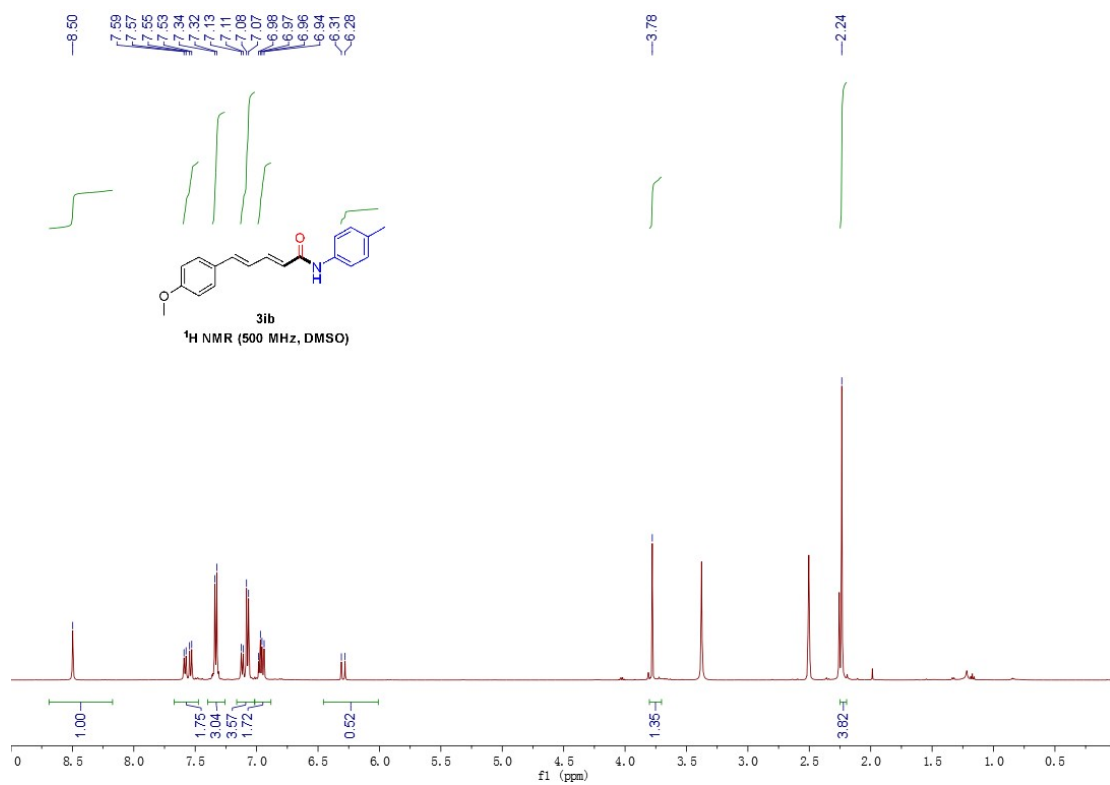

Figure S77. <sup>1</sup>H NMR (500 MHz, DMSO) spectrum of 3ib

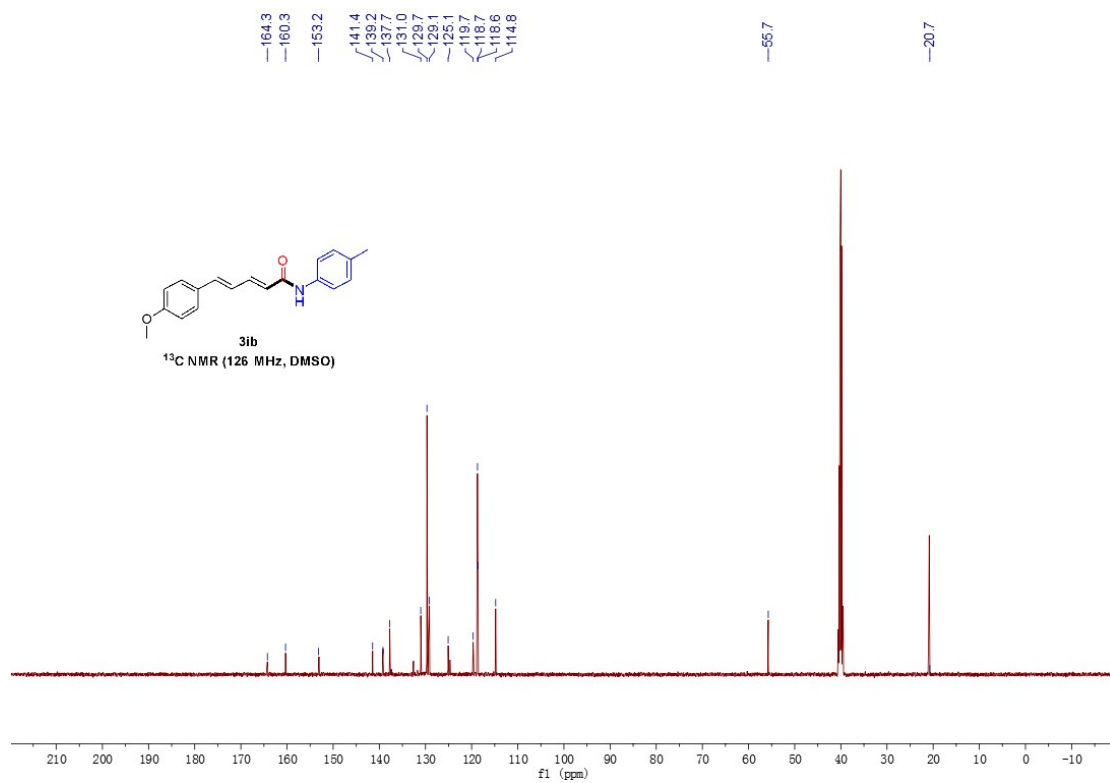

Figure S78. <sup>13</sup>C NMR (126 MHz, CDCl<sub>3</sub>) spectrum of 3ib

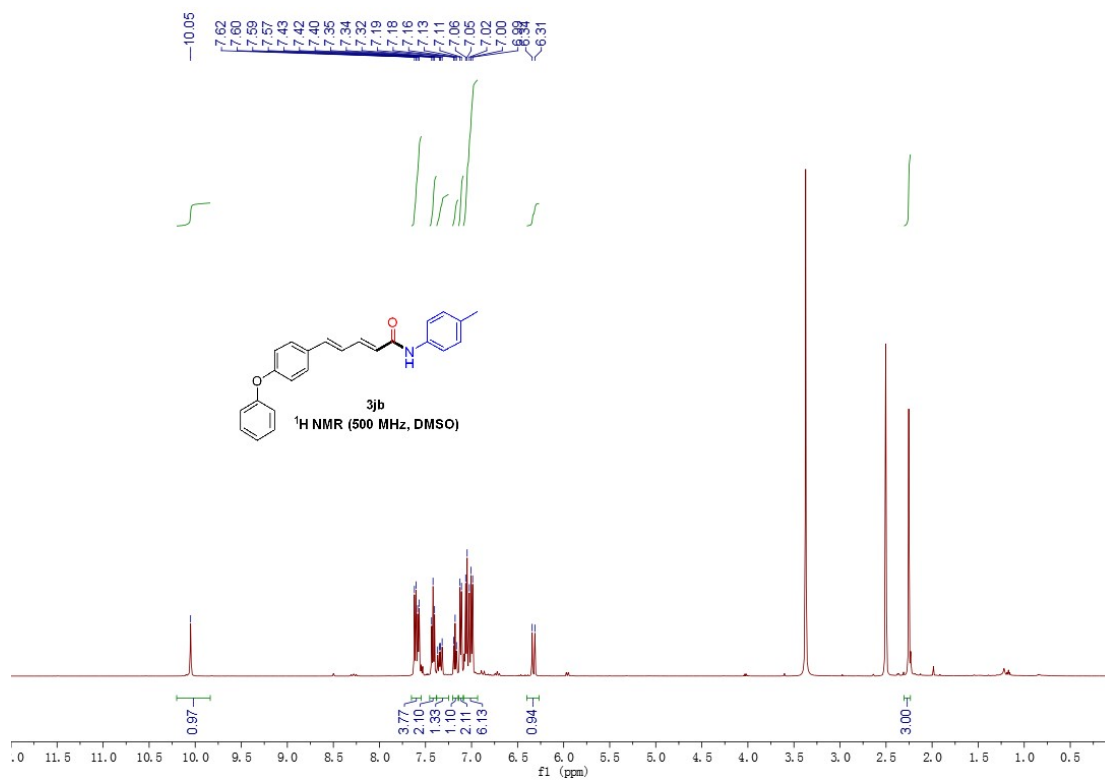

Figure S79. <sup>1</sup>H NMR (500 MHz, DMSO) spectrum of 3jb

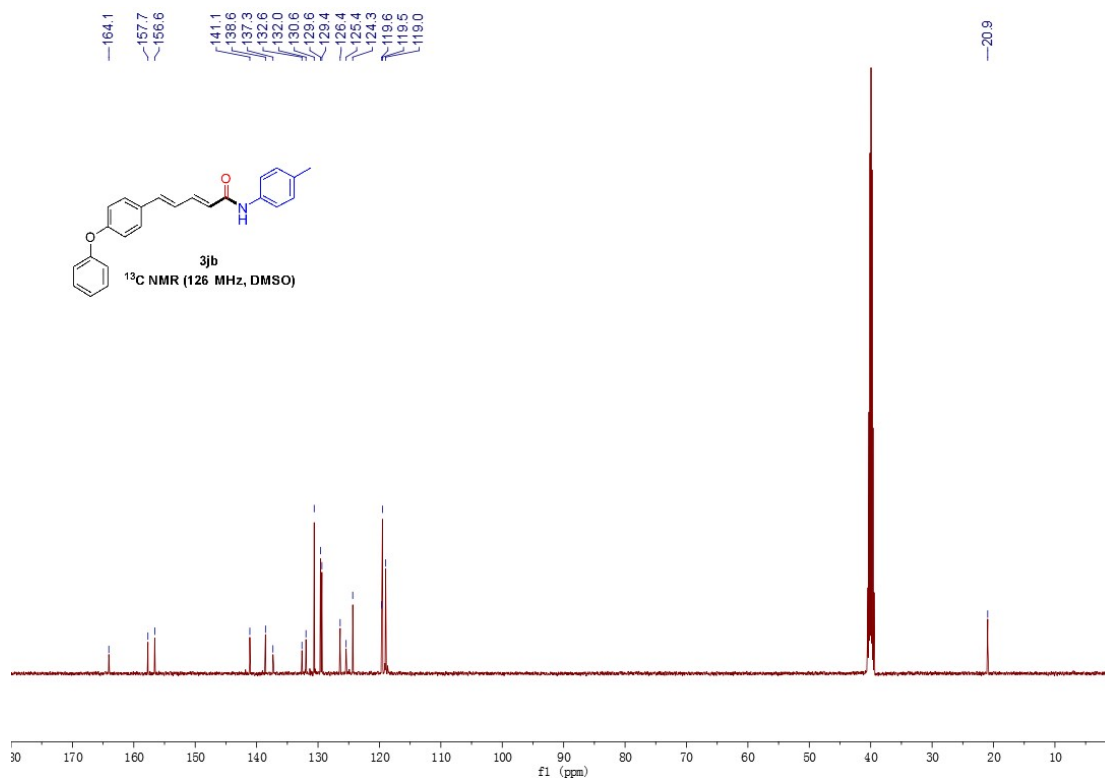

Figure S80. <sup>13</sup>C NMR (126 MHz, DMSO) spectrum of 3jb



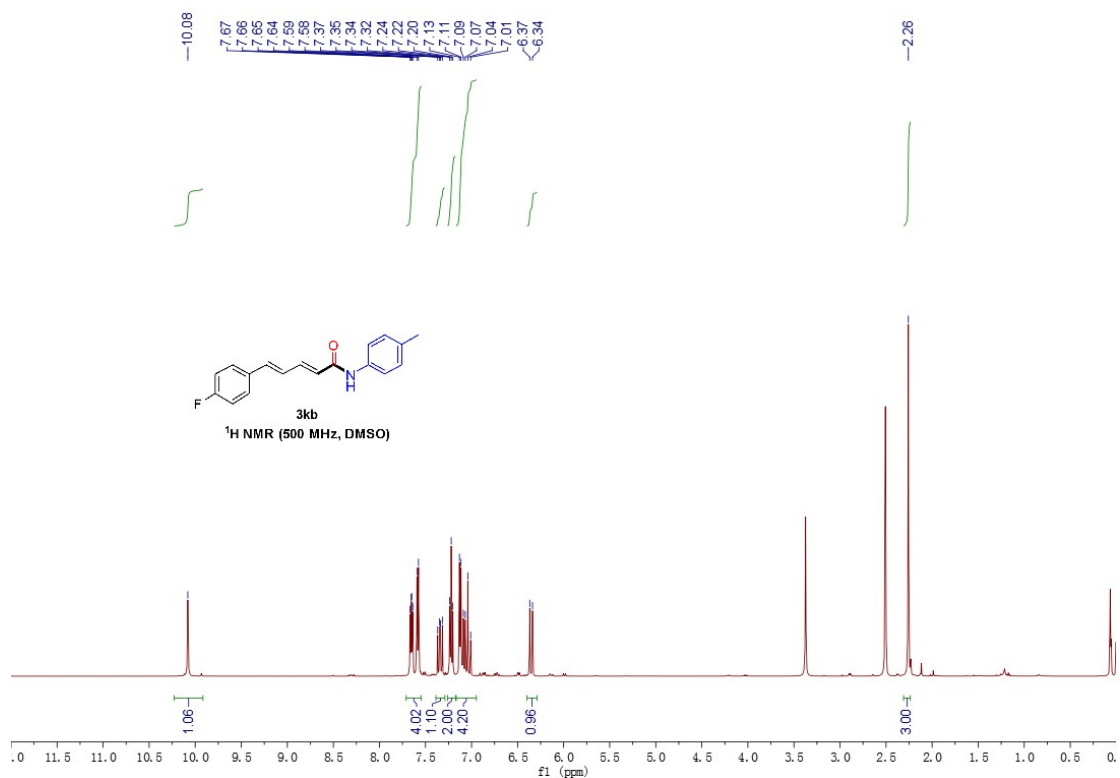

Figure S81. <sup>1</sup>H NMR (500 MHz, DMSO) spectrum of 3kb

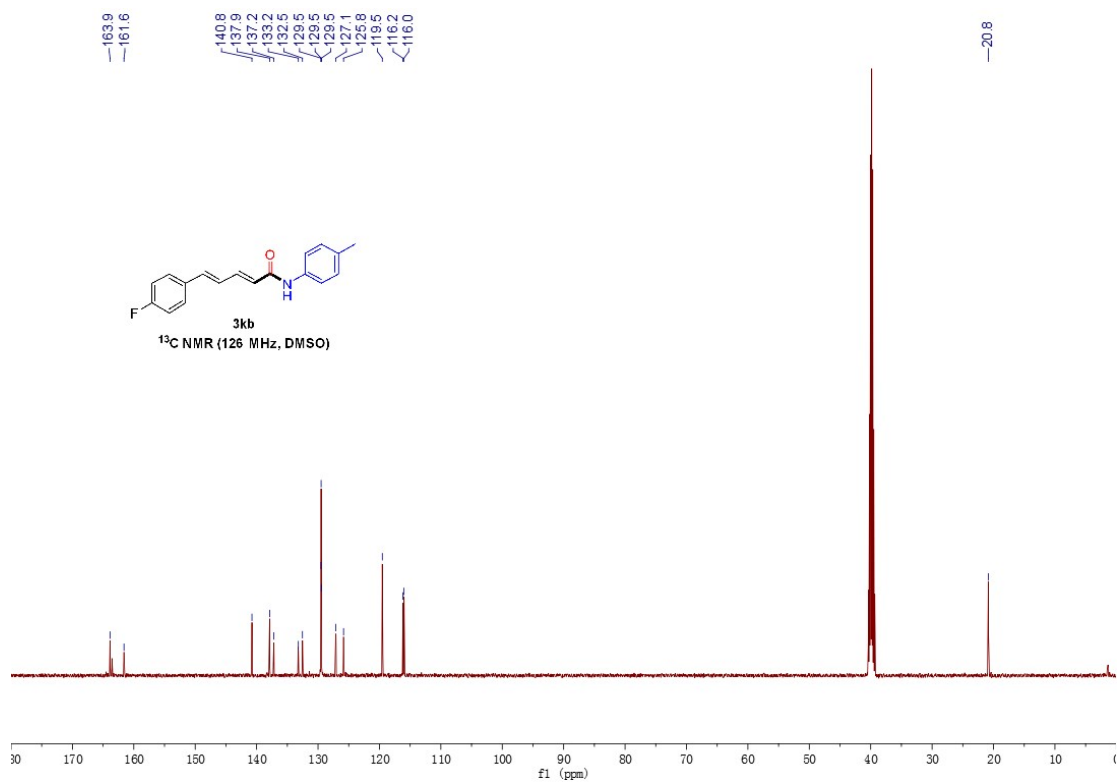

Figure S82. <sup>13</sup>C NMR (126 MHz, DMSO) spectrum of 3kb

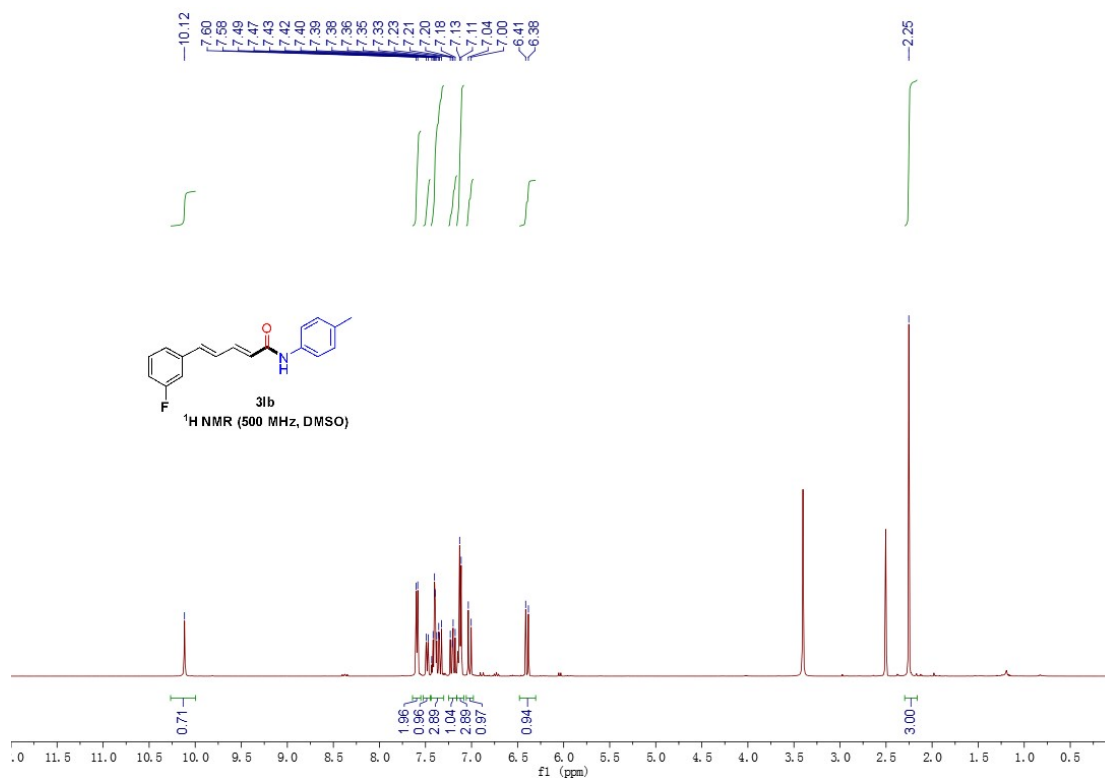

**Figure S83. <sup>1</sup>H NMR (500 MHz, DMSO) spectrum of 3lb**

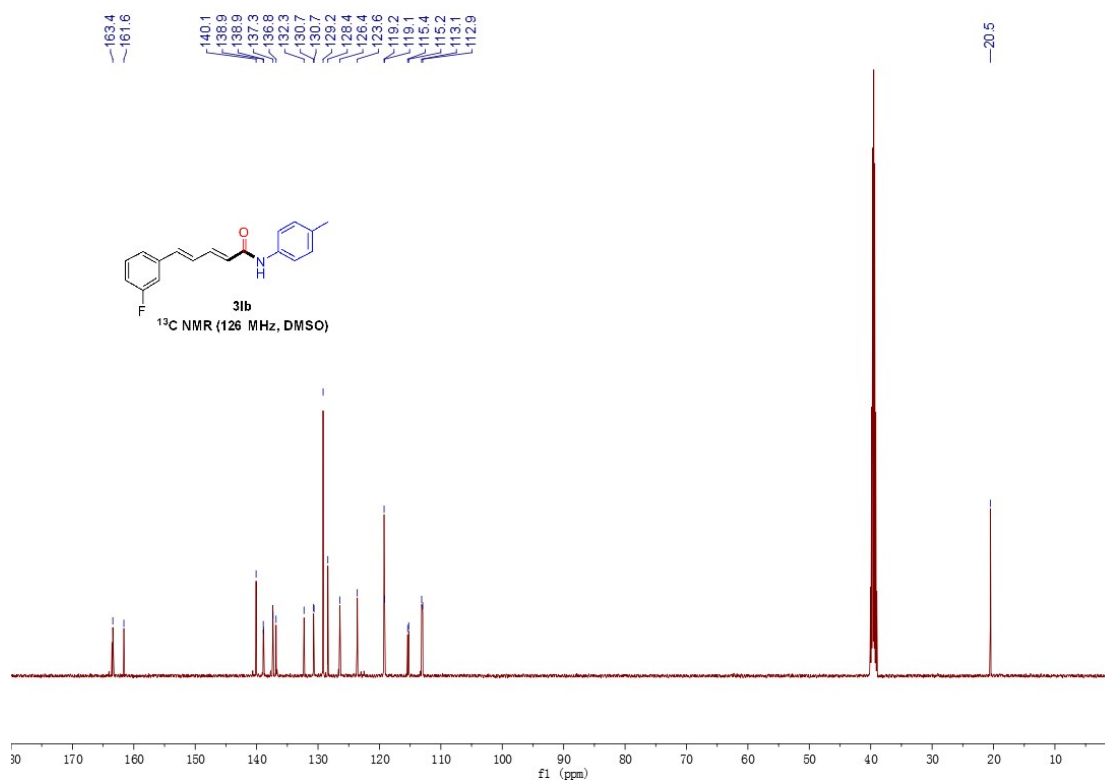

**Figure S84. <sup>13</sup>C NMR (126 MHz, DMSO) spectrum of 3lb**

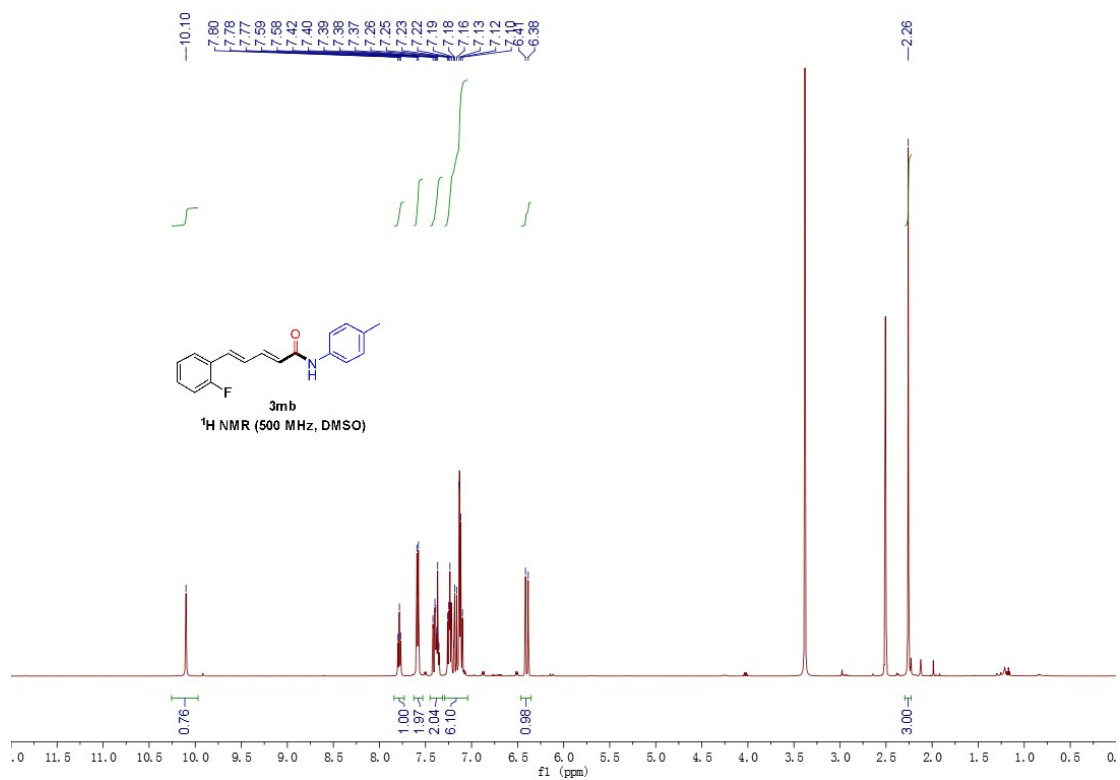

Figure S85. <sup>1</sup>H NMR (500 MHz, DMSO) spectrum of 3mb

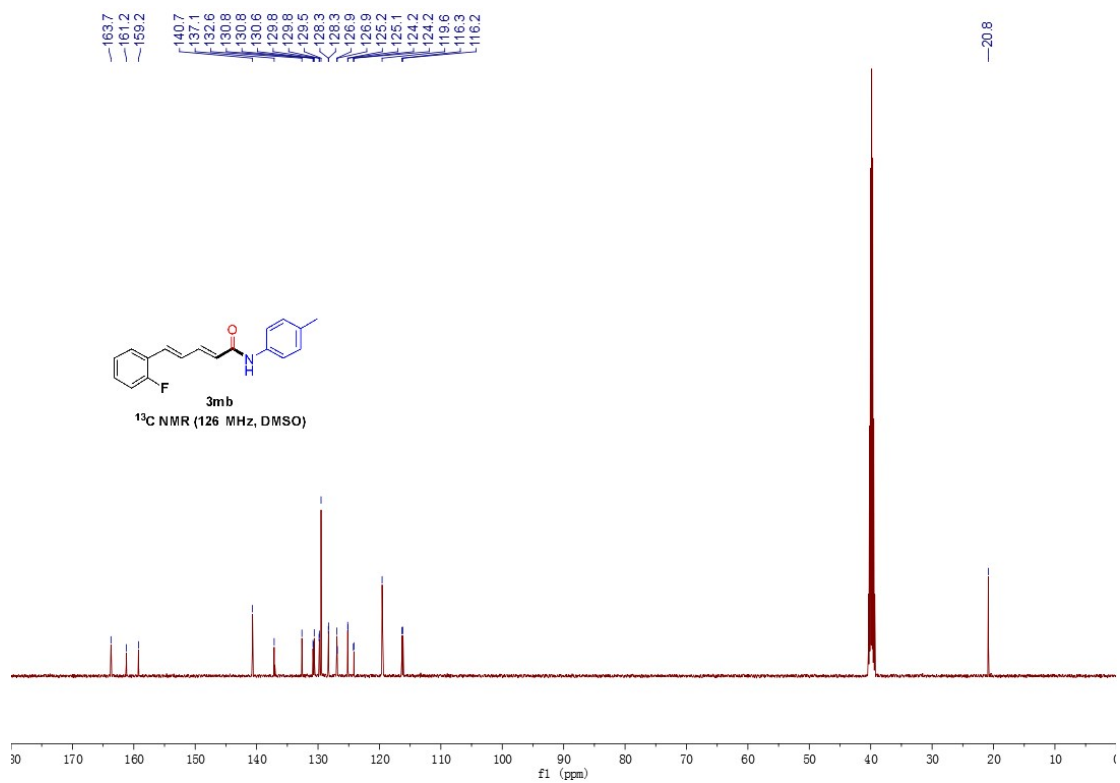

Figure S86. <sup>13</sup>C NMR (126 MHz, DMSO) spectrum of 3mb

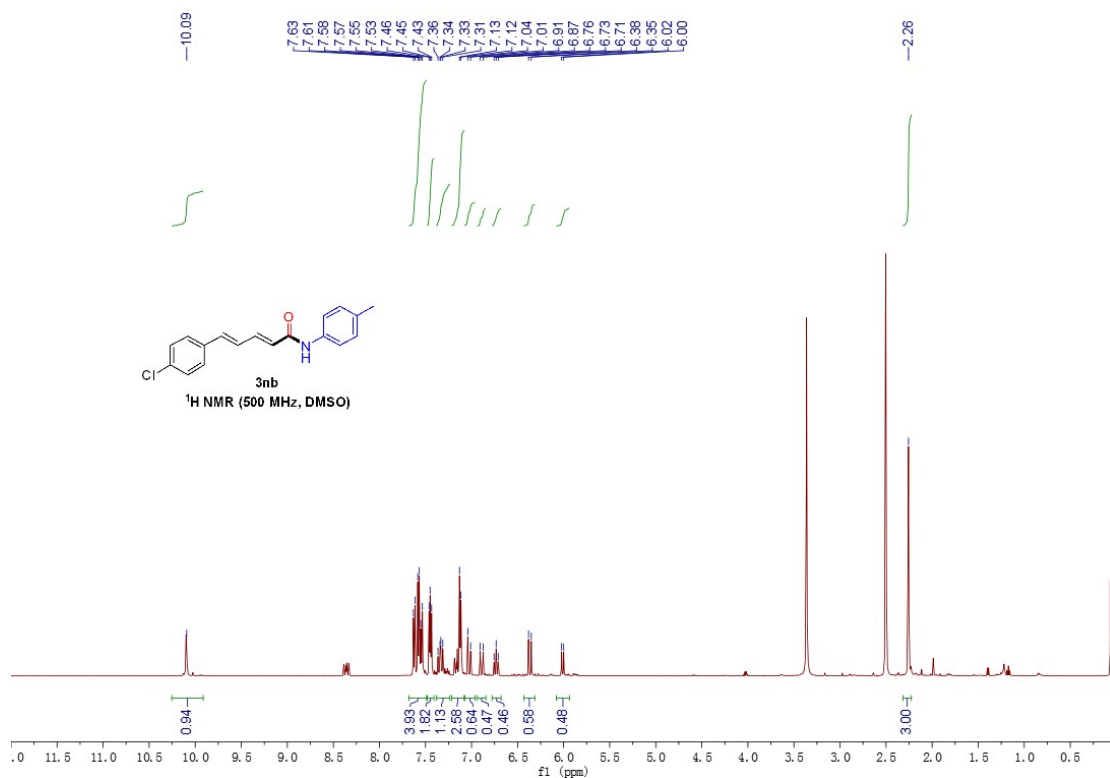

Figure S87. <sup>1</sup>H NMR (500 MHz, DMSO) spectrum of 3nb

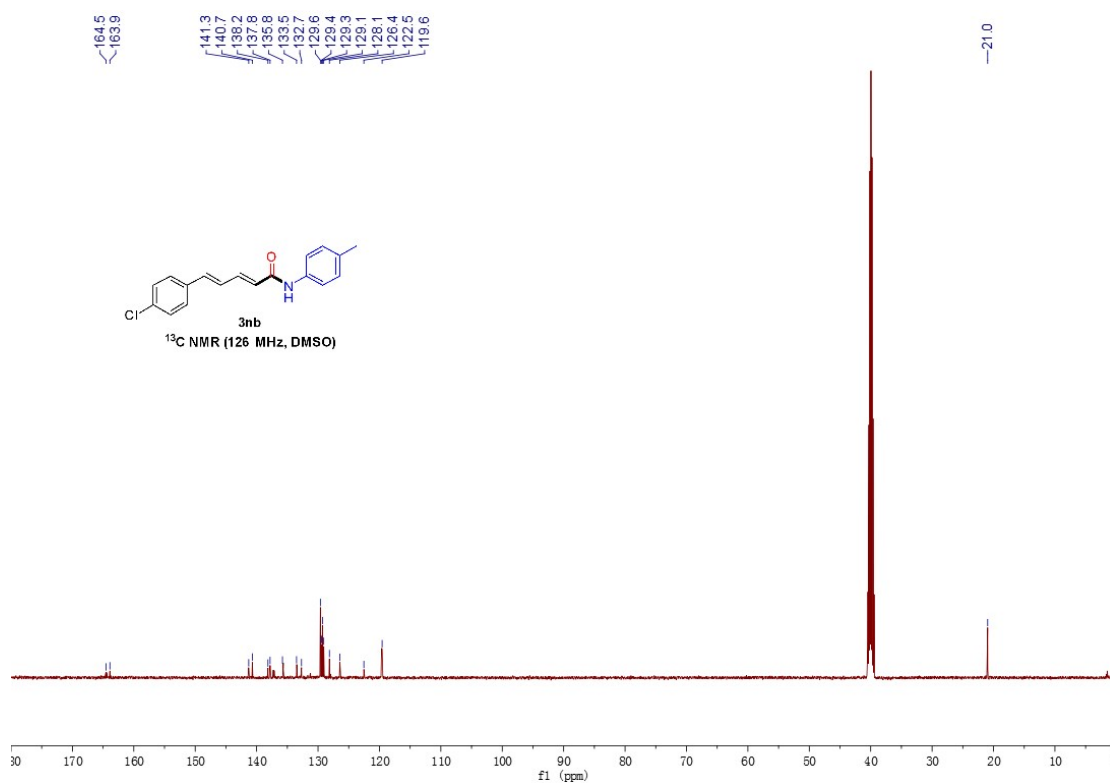

Figure S88. <sup>13</sup>C NMR (126 MHz, DMSO) spectrum of 3nb

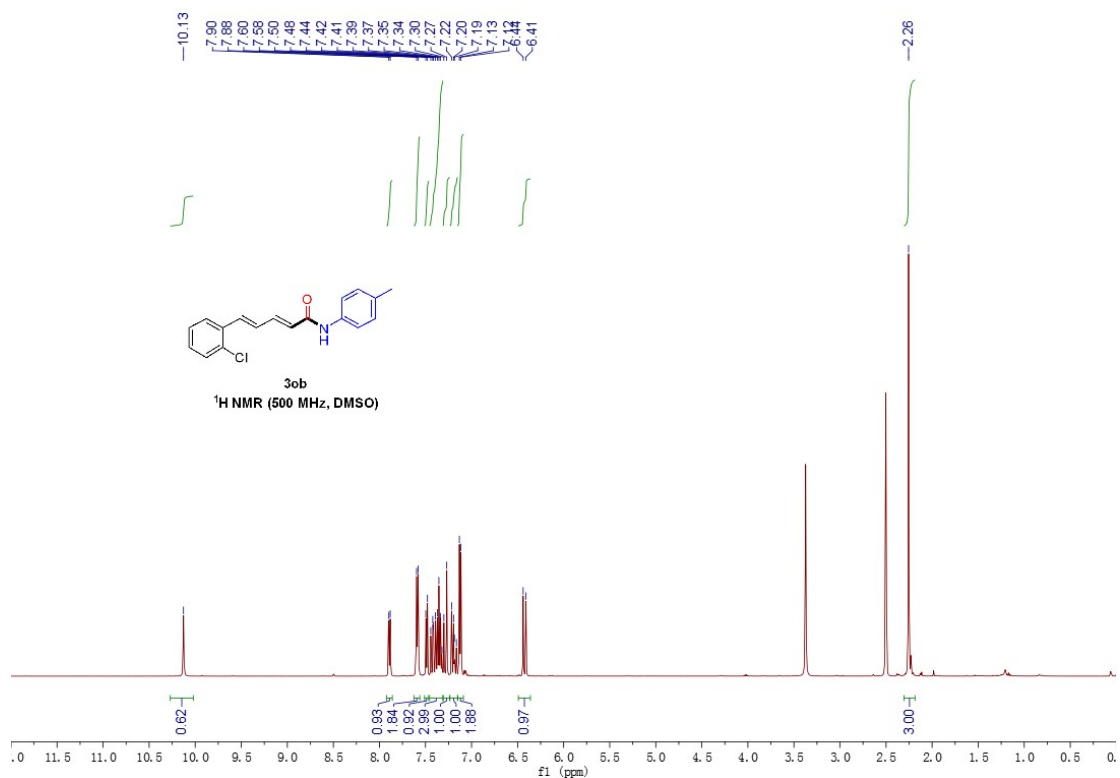

Figure S89. <sup>1</sup>H NMR (500 MHz, DMSO) spectrum of **3ob**

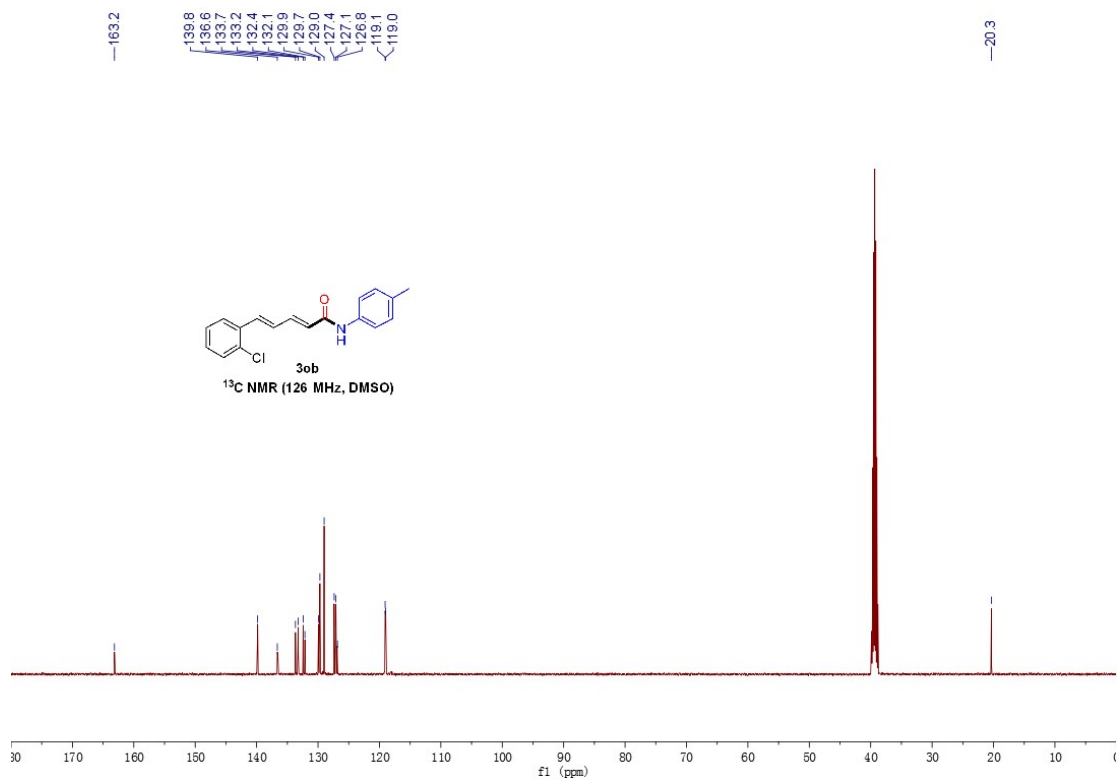

Figure S90. <sup>13</sup>C NMR (126 MHz, DMSO) spectrum of **3ob**

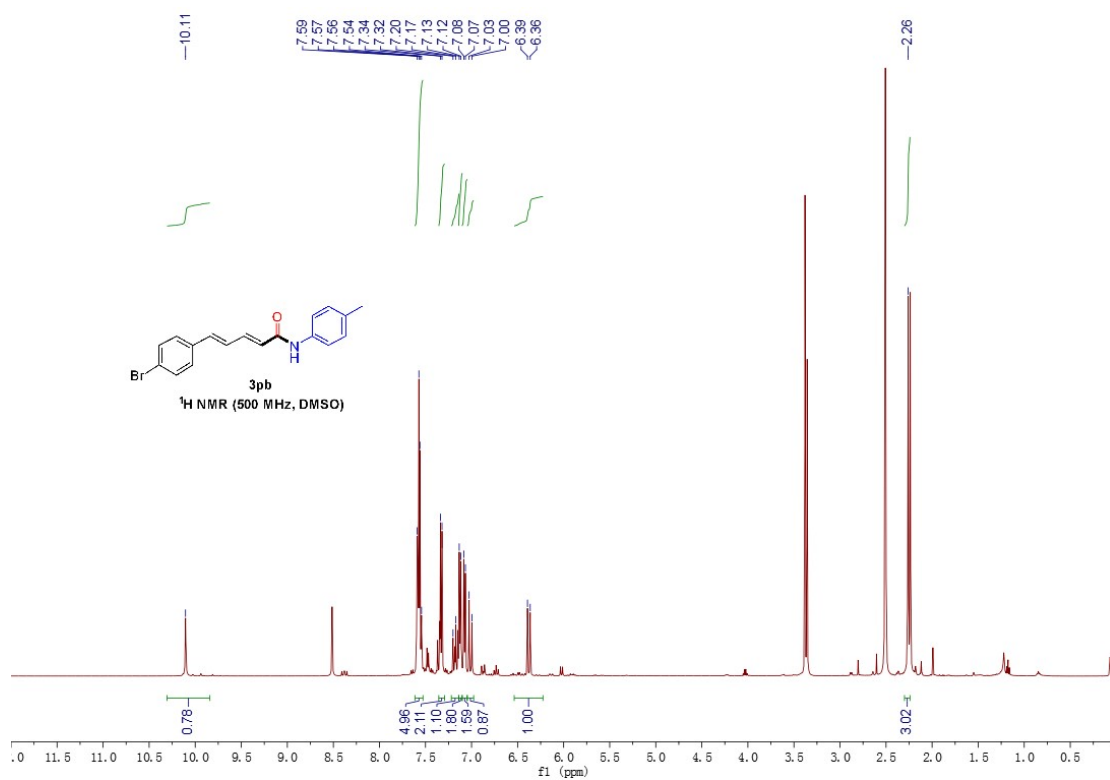

Figure S91. <sup>1</sup>H NMR (500 MHz, DMSO) spectrum of 3pb

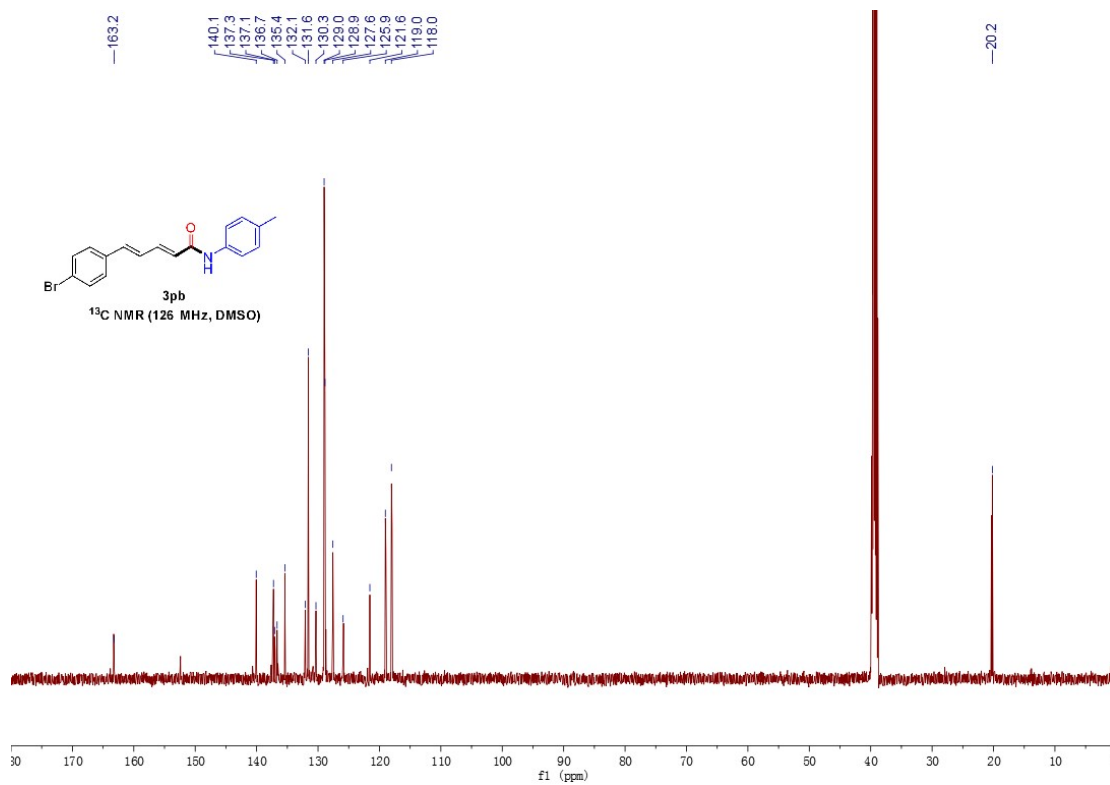

Figure S92. <sup>13</sup>C NMR (126 MHz, DMSO) spectrum of 3pb

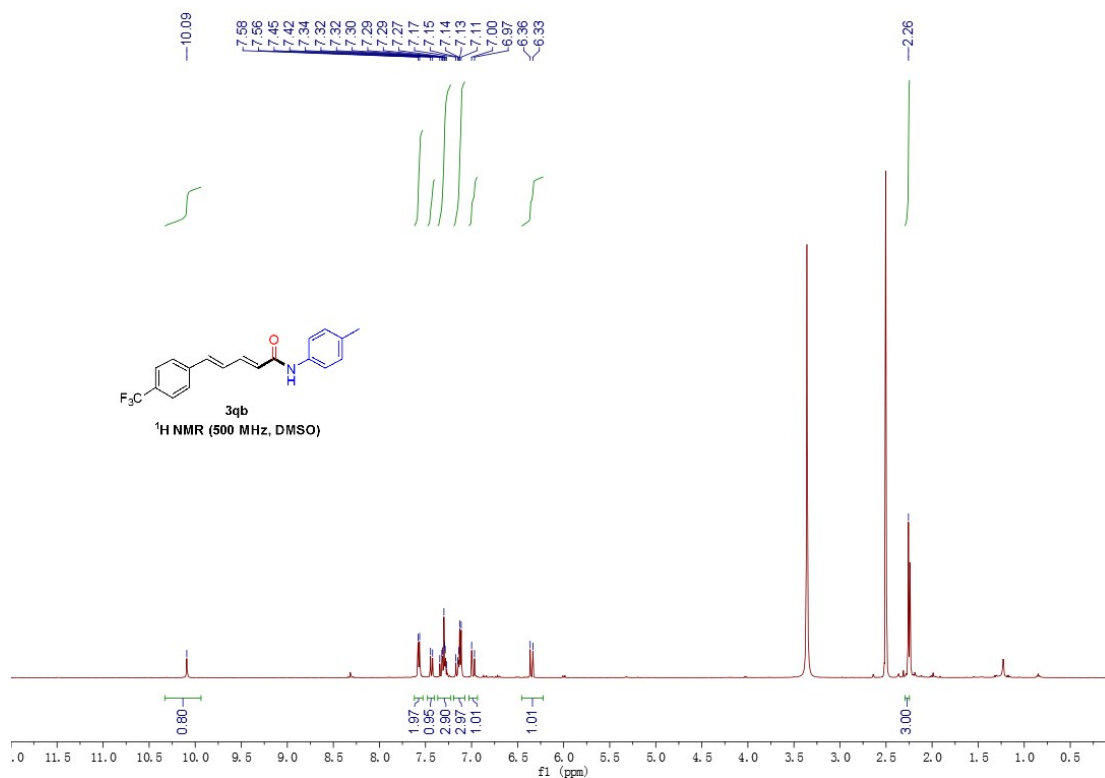

Figure S93. <sup>1</sup>H NMR (500 MHz, DMSO) spectrum of 3qb

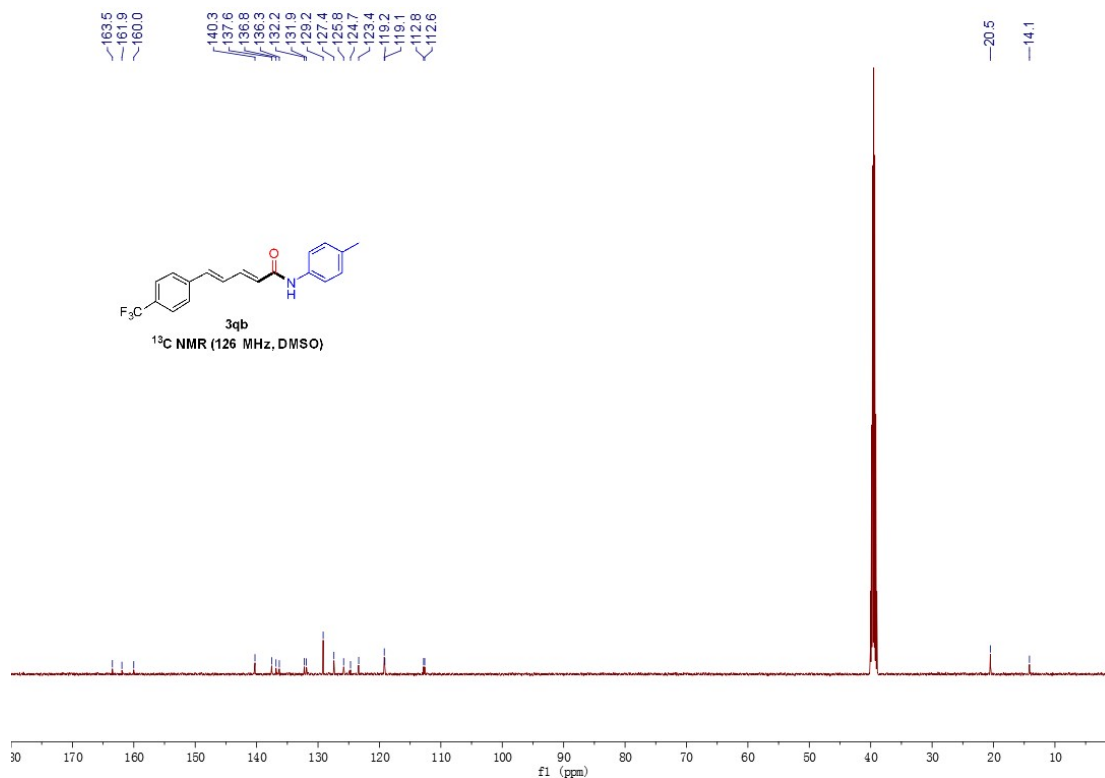

Figure S94. <sup>13</sup>C NMR (126 MHz, DMSO) spectrum of 3qb

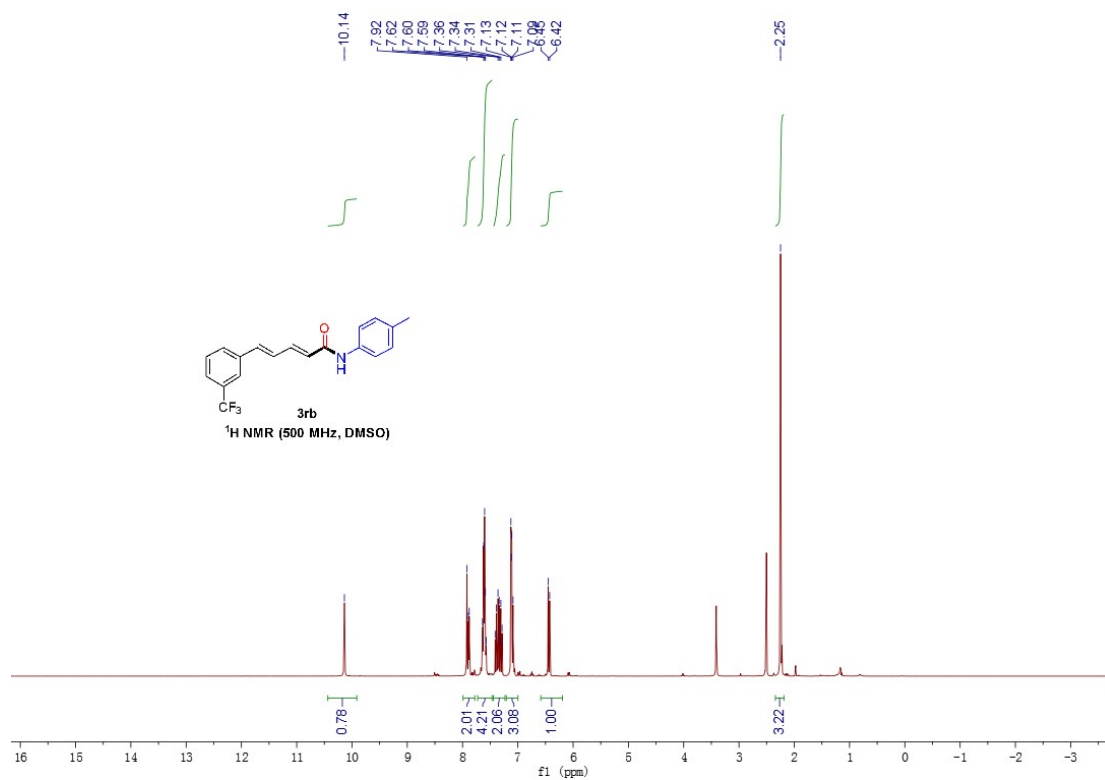

**Figure S95. <sup>1</sup>H NMR (500 MHz, DMSO) spectrum of 3rb**

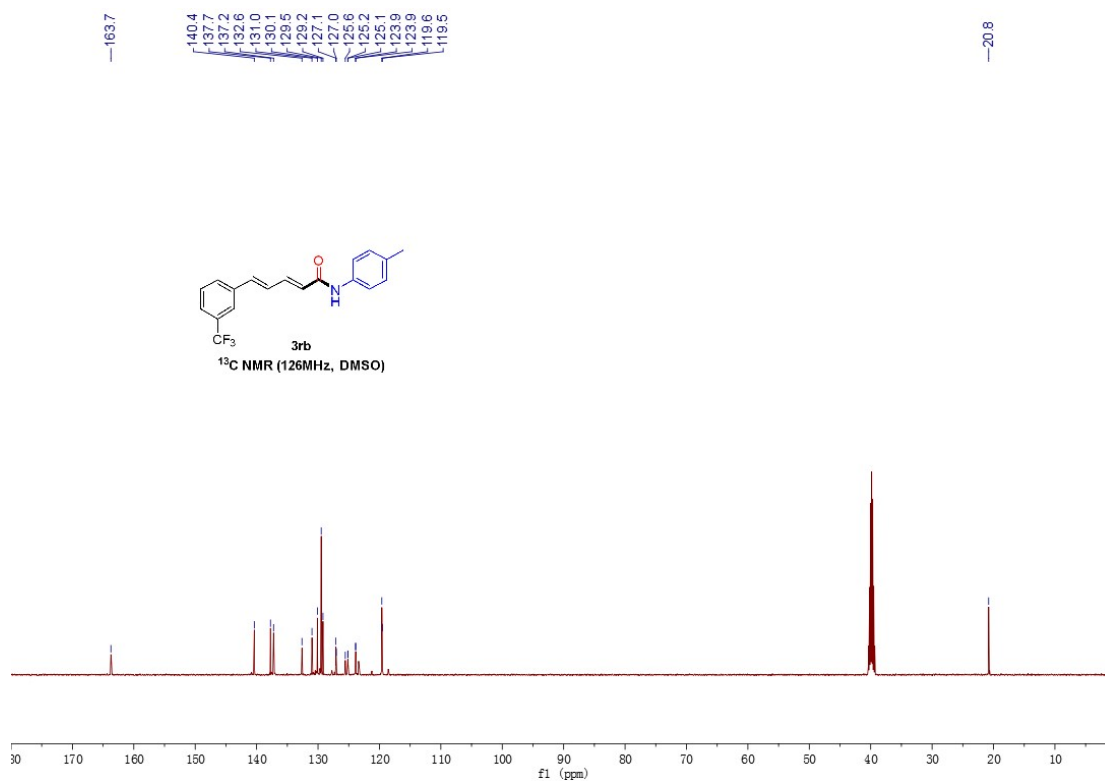

**Figure S96. <sup>13</sup>C NMR (126 MHz, DMSO) spectrum of 3rb**



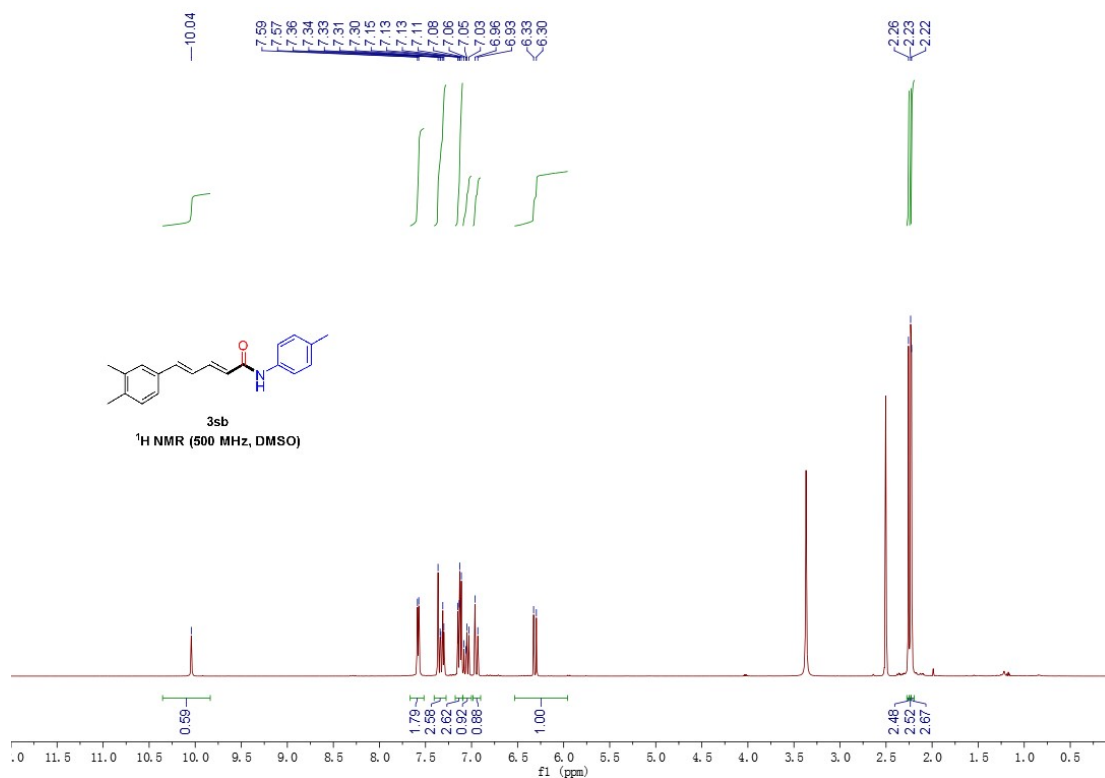

Figure S97. <sup>1</sup>H NMR (500 MHz, DMSO) spectrum of 3sb

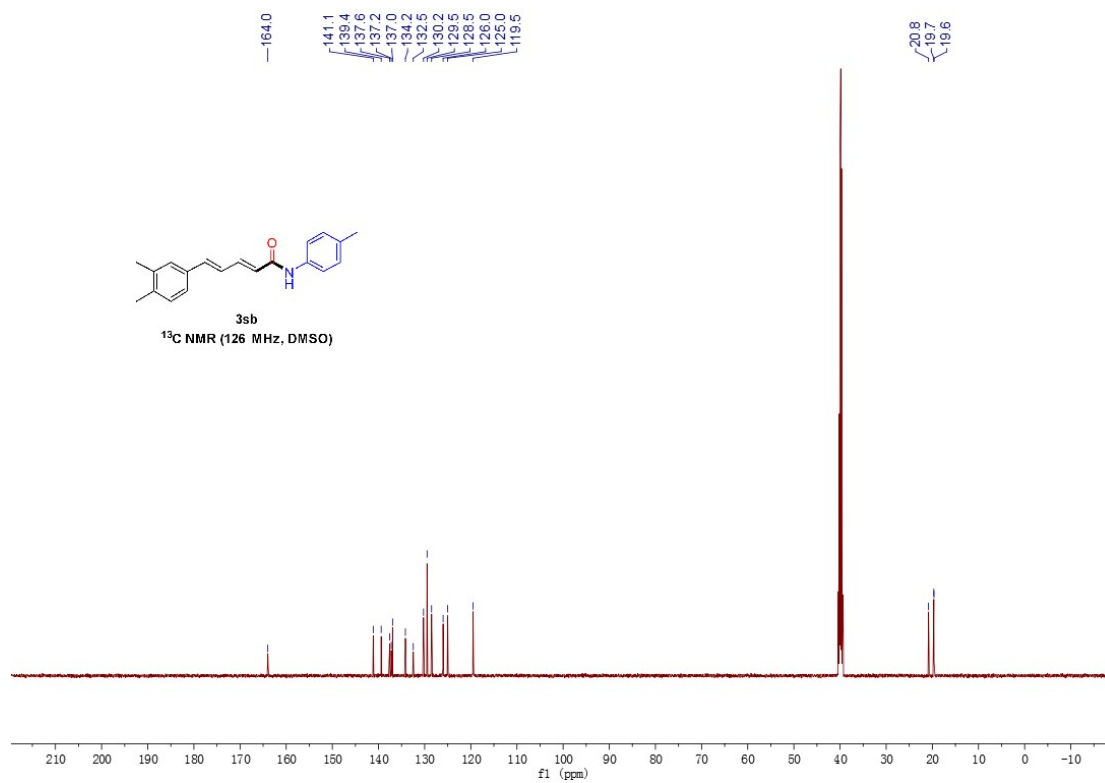

Figure S98. <sup>13</sup>C NMR (126 MHz, DMSO) spectrum of 3sb

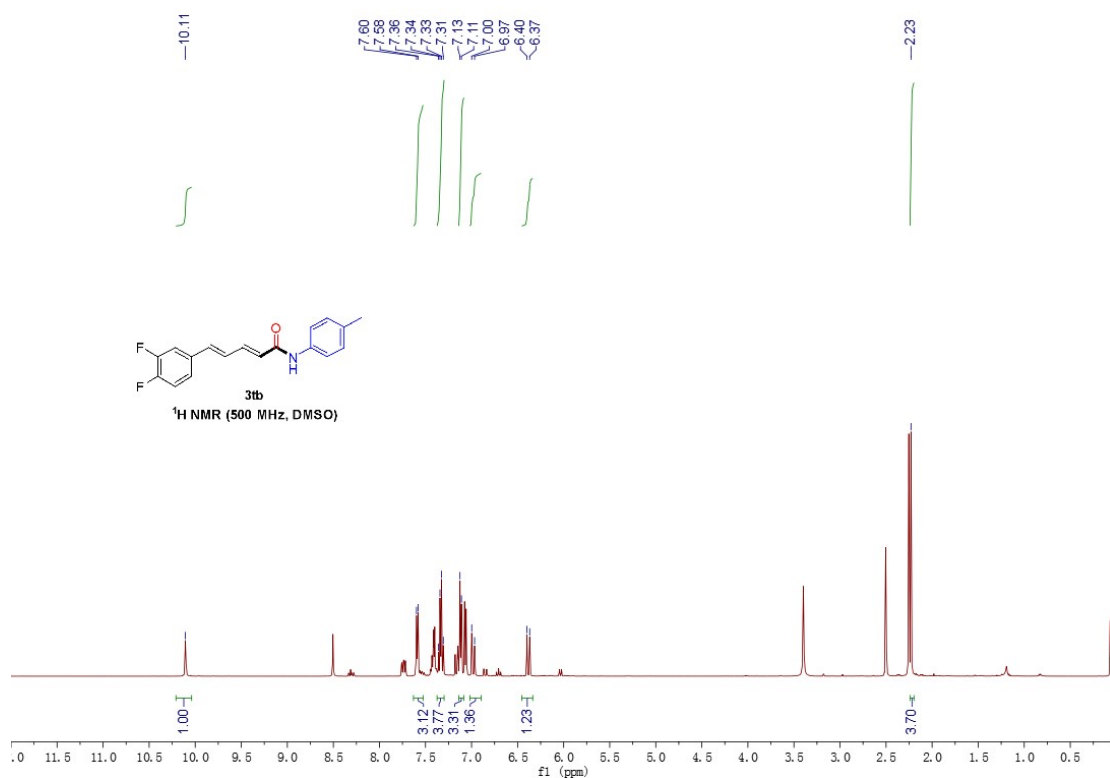

Figure S99. <sup>1</sup>H NMR (500 MHz, DMSO) spectrum of **3tb**

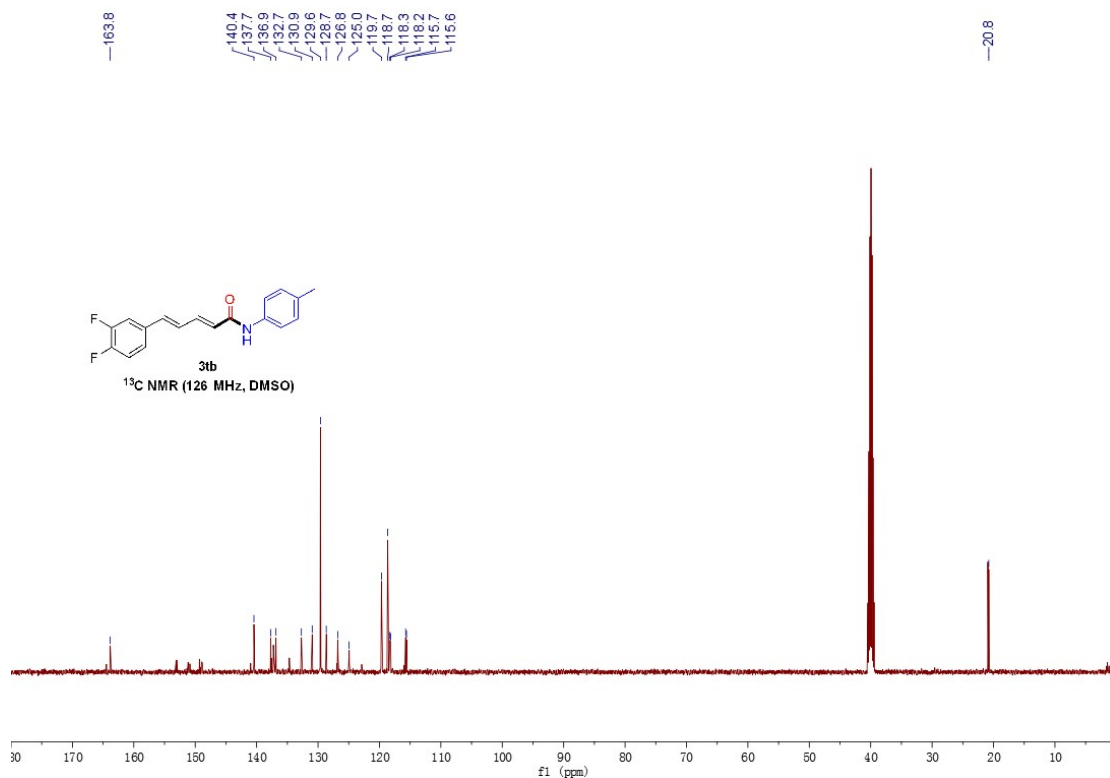

Figure S100. <sup>13</sup>C NMR (126 MHz, DMSO) spectrum of **3tb**

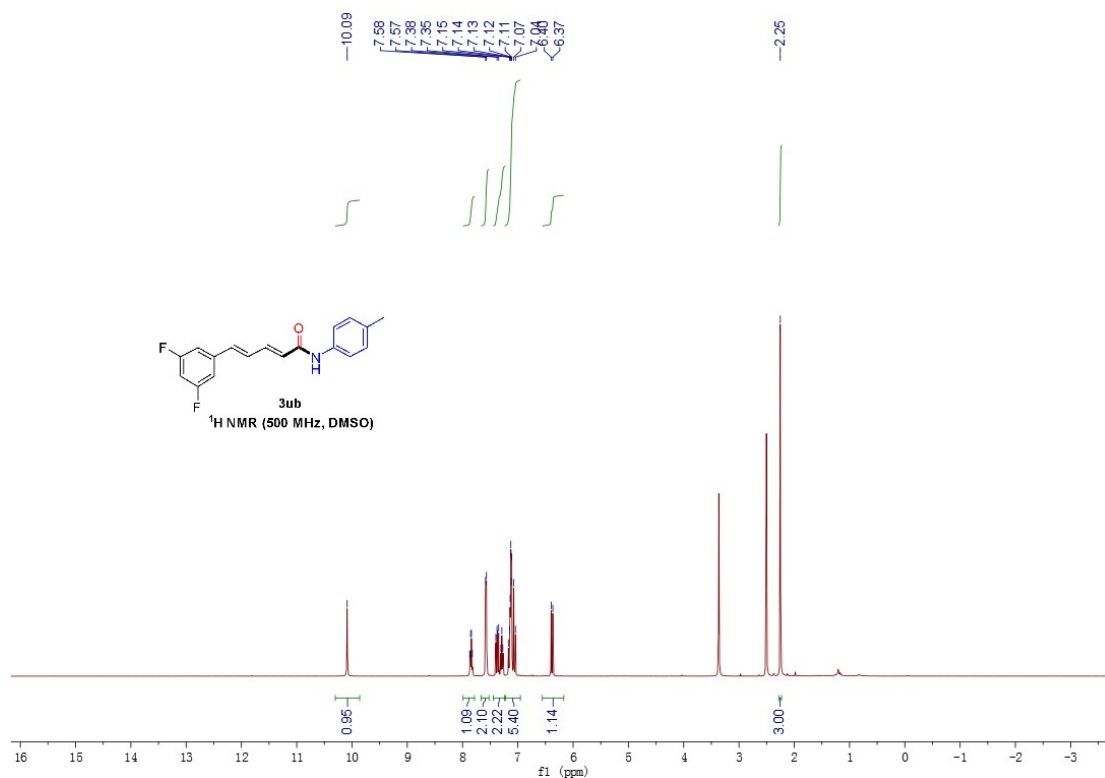

**Figure S101. <sup>1</sup>H NMR (500 MHz, DMSO) spectrum of 3ub**

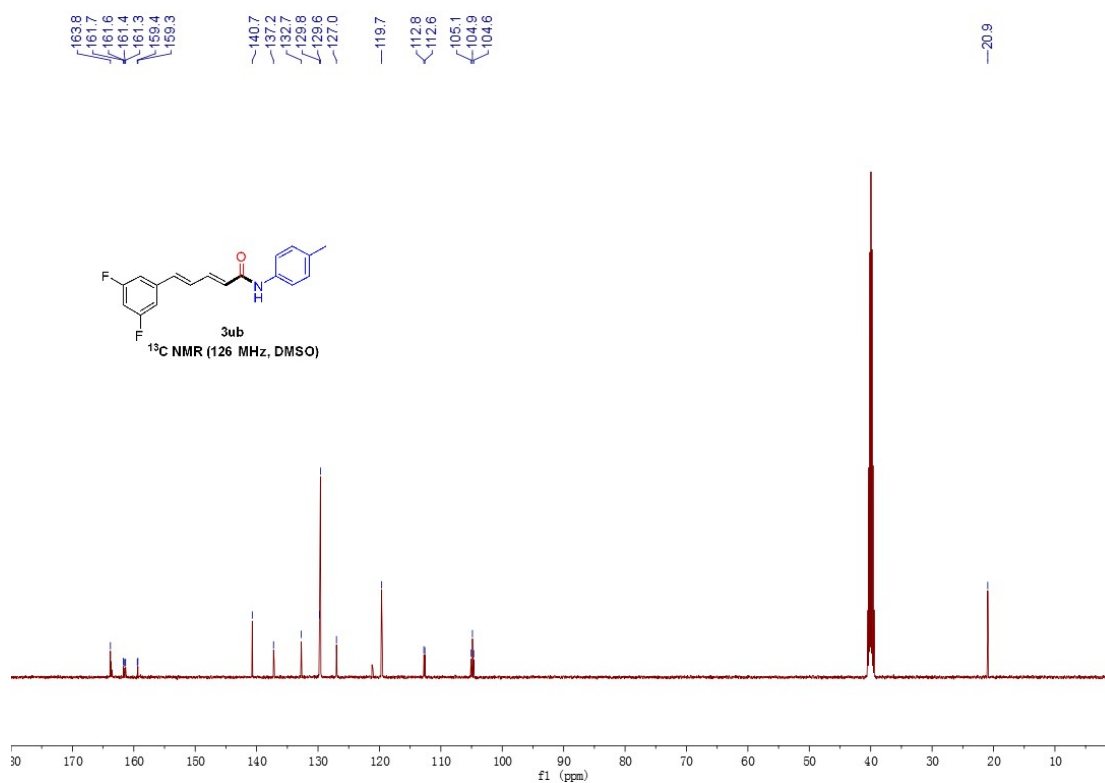

**Figure S102. <sup>13</sup>C NMR (126 MHz, DMSO) spectrum of 3ub**

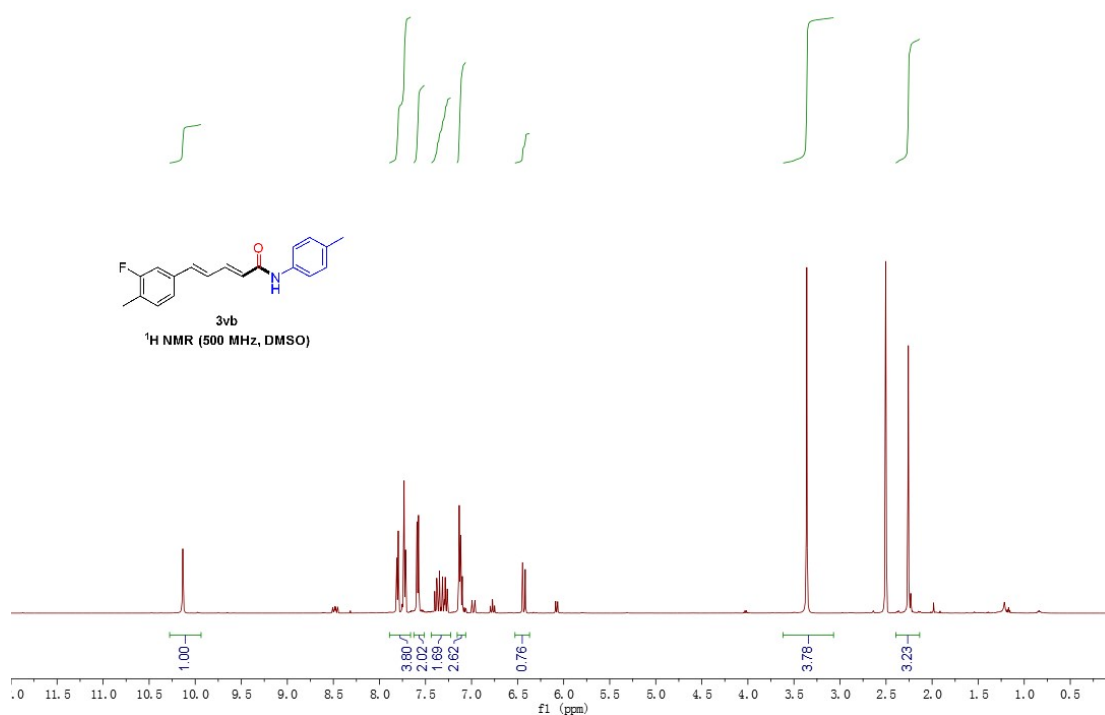

Figure S103. <sup>1</sup>H NMR (500 MHz, DMSO) spectrum of 3vb

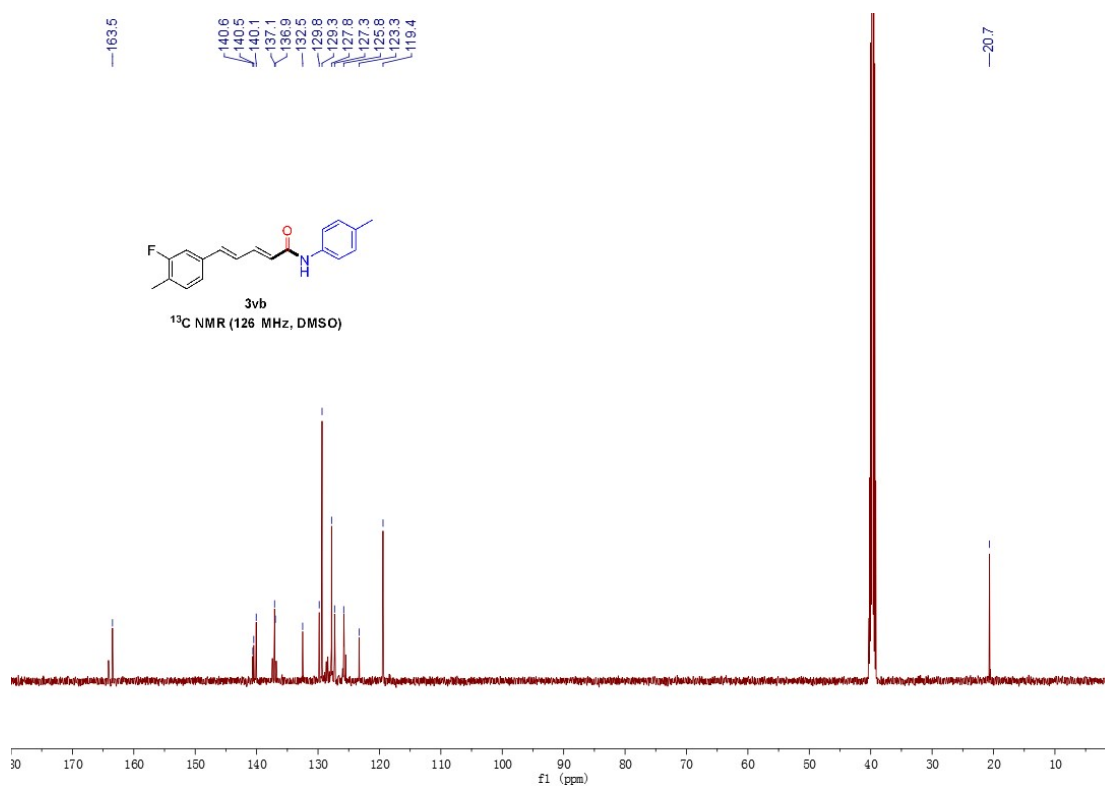

Figure S104. <sup>13</sup>C NMR (126 MHz, DMSO) spectrum of 3vb

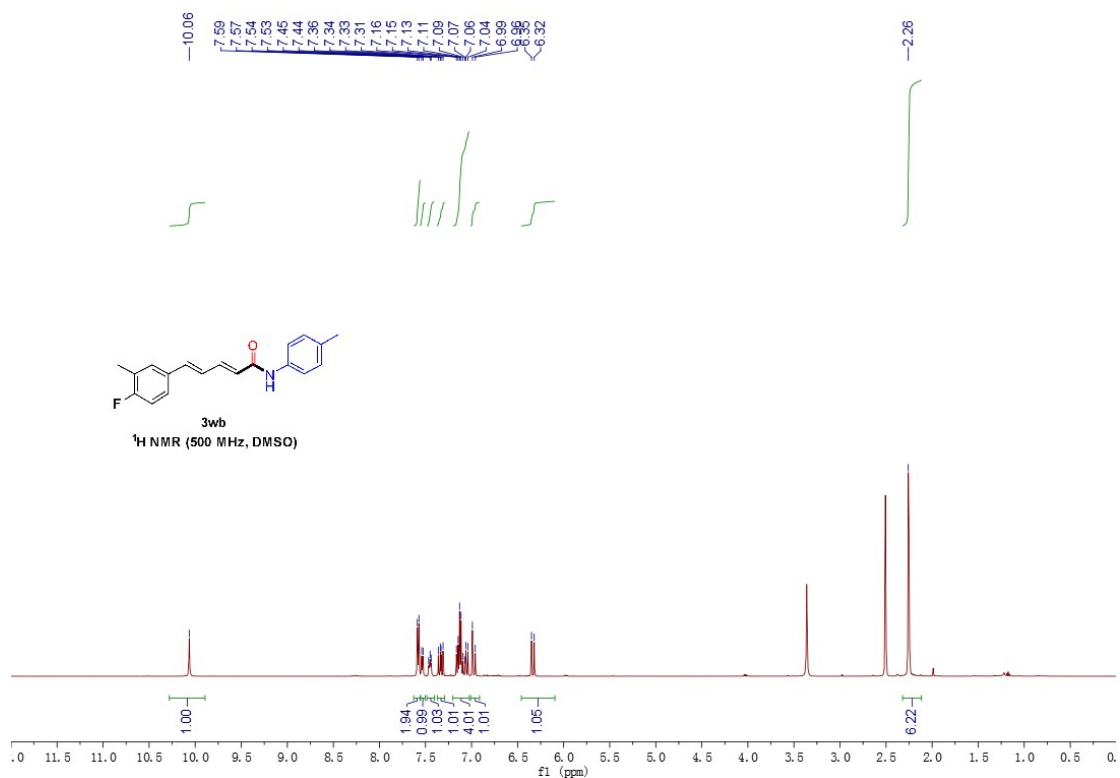

Figure S105. <sup>1</sup>H NMR (500 MHz, DMSO) spectrum of **3wb**

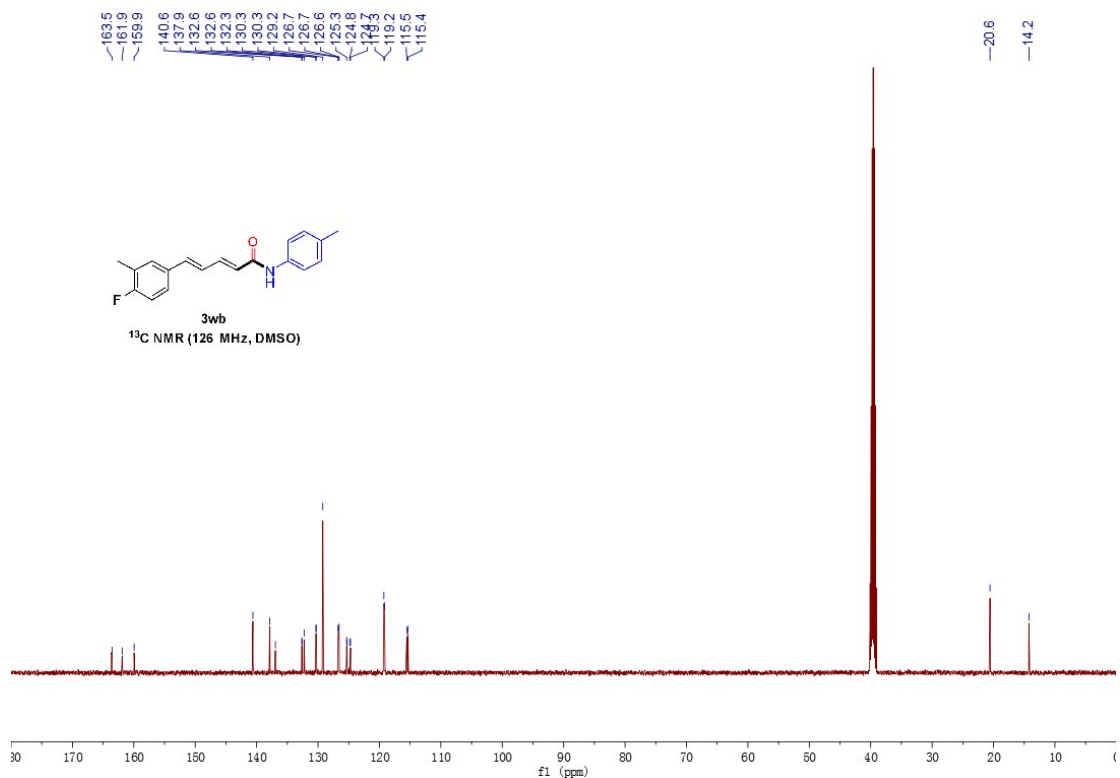

Figure S106. <sup>13</sup>C NMR (126 MHz, DMSO) spectrum of **3wb**

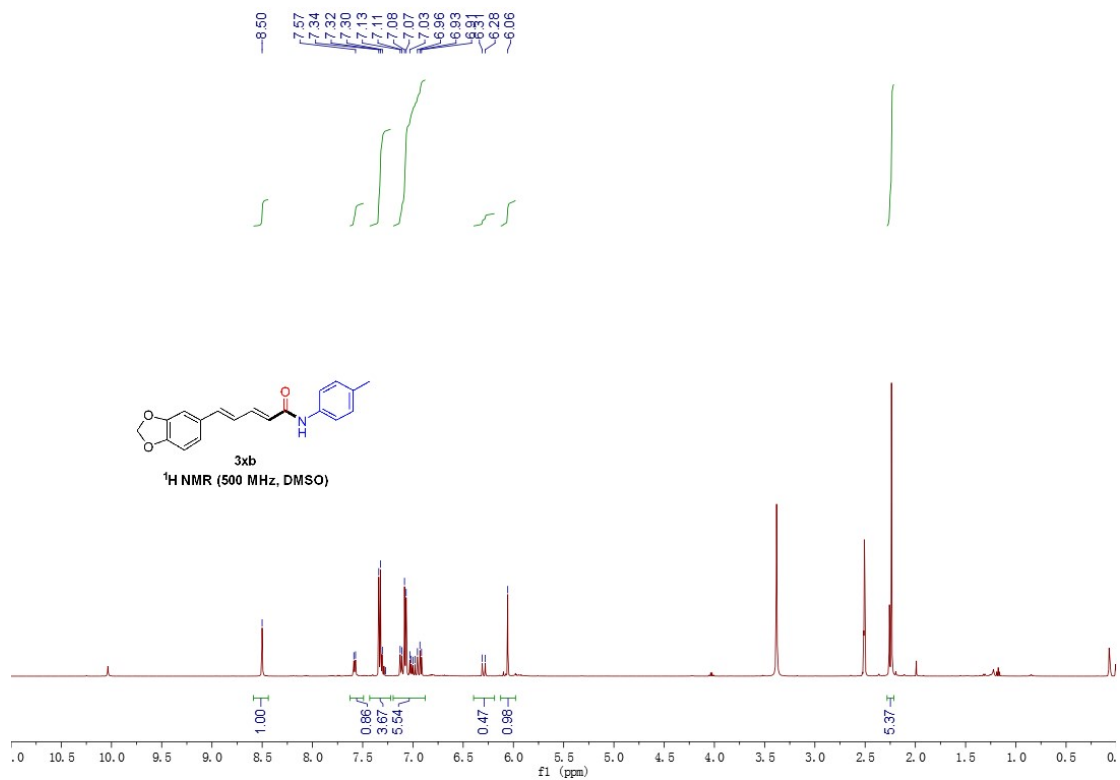

Figure S107. <sup>1</sup>H NMR (500 MHz, DMSO) spectrum of 3xb

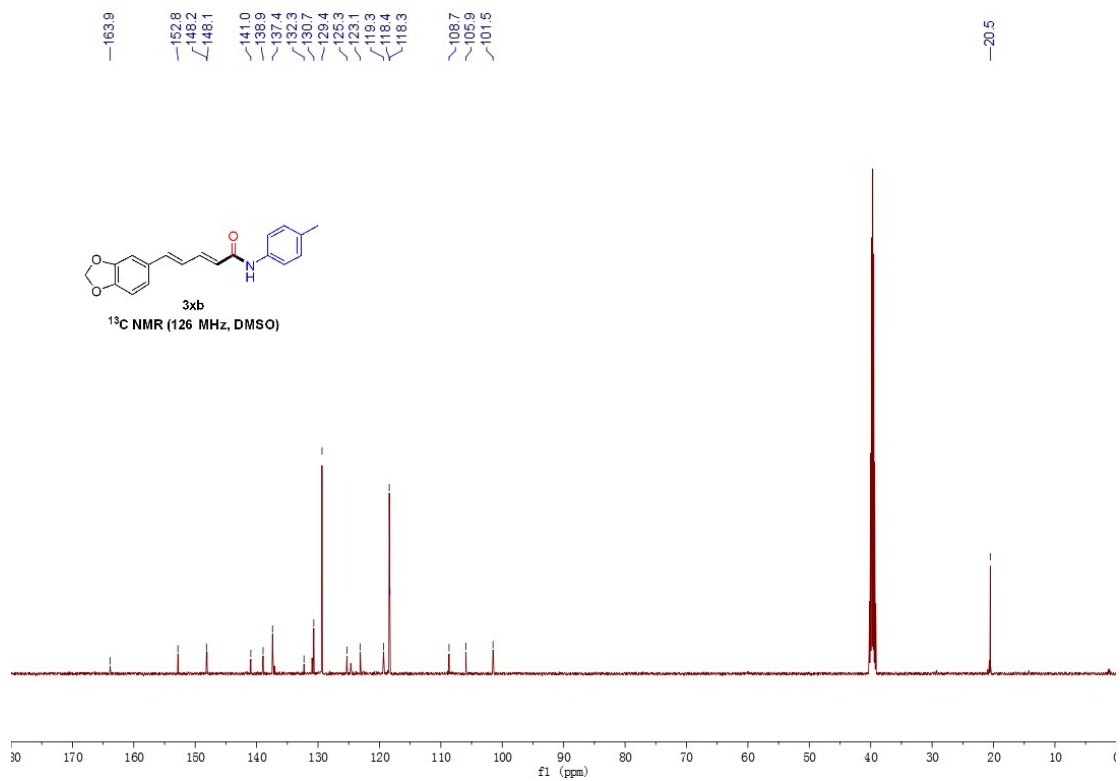

Figure S108. <sup>13</sup>C NMR (126 MHz, DMSO) spectrum of 3xb

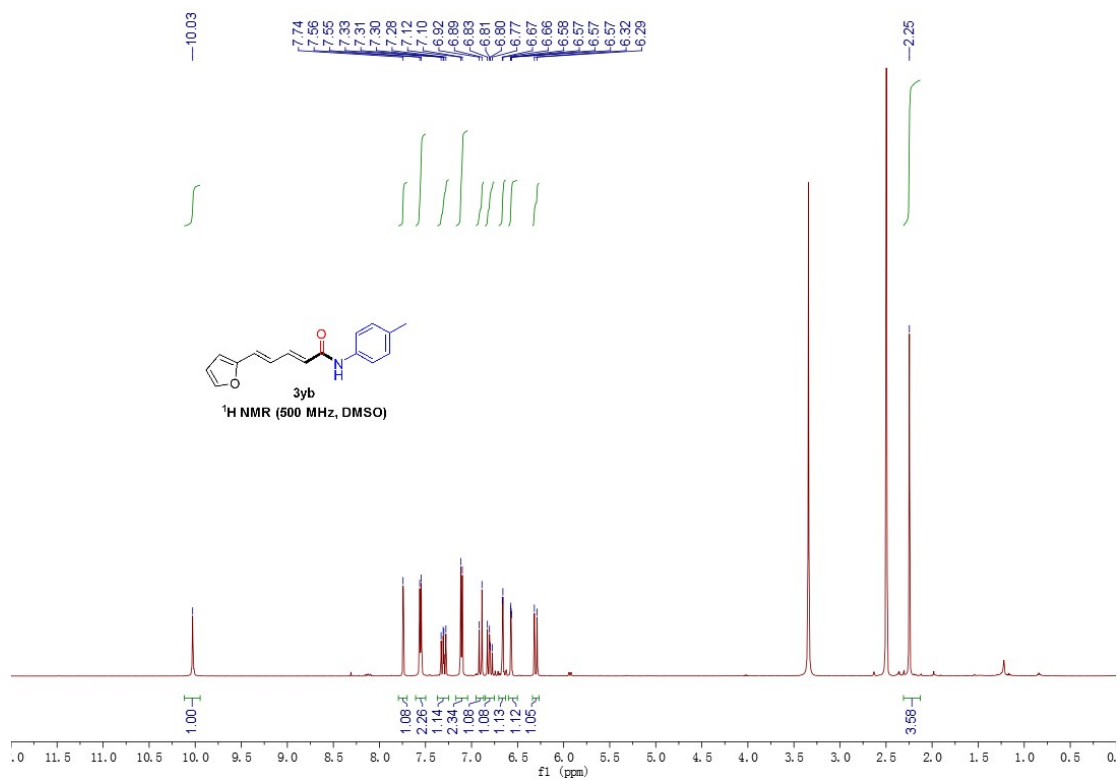

Figure S109. <sup>1</sup>H NMR (500 MHz, DMSO) spectrum of 3yb

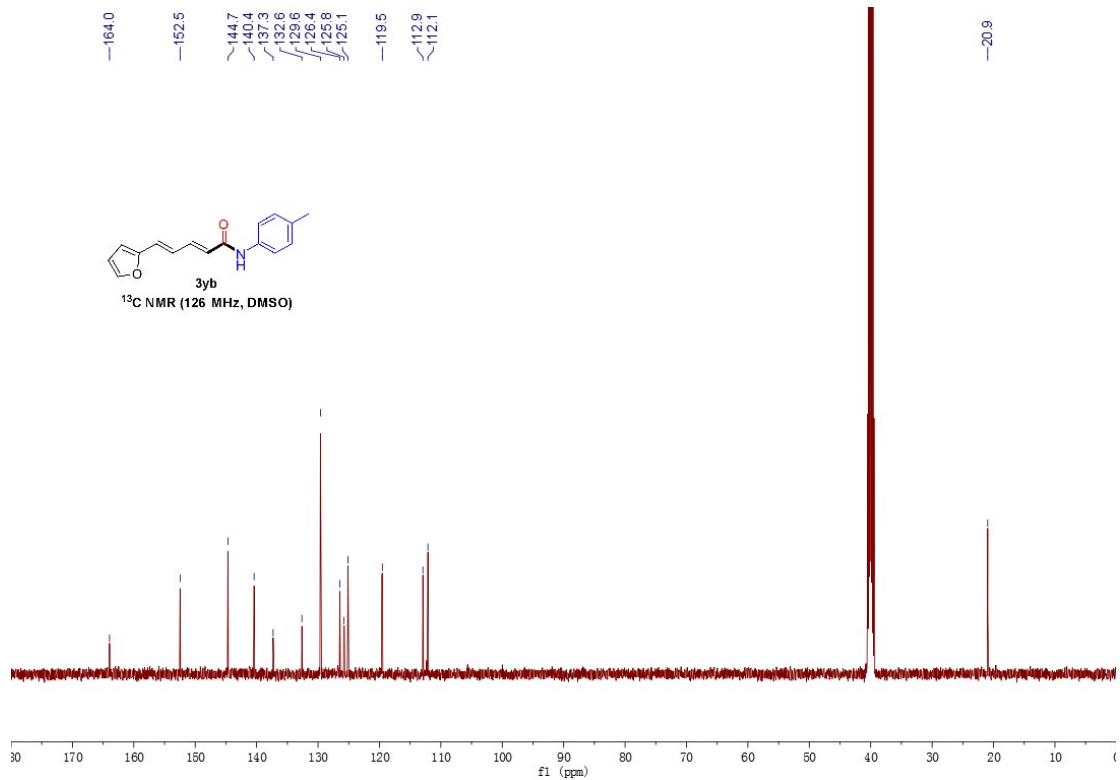

Figure S110. <sup>13</sup>C NMR (126 MHz, DMSO) spectrum of 3yb

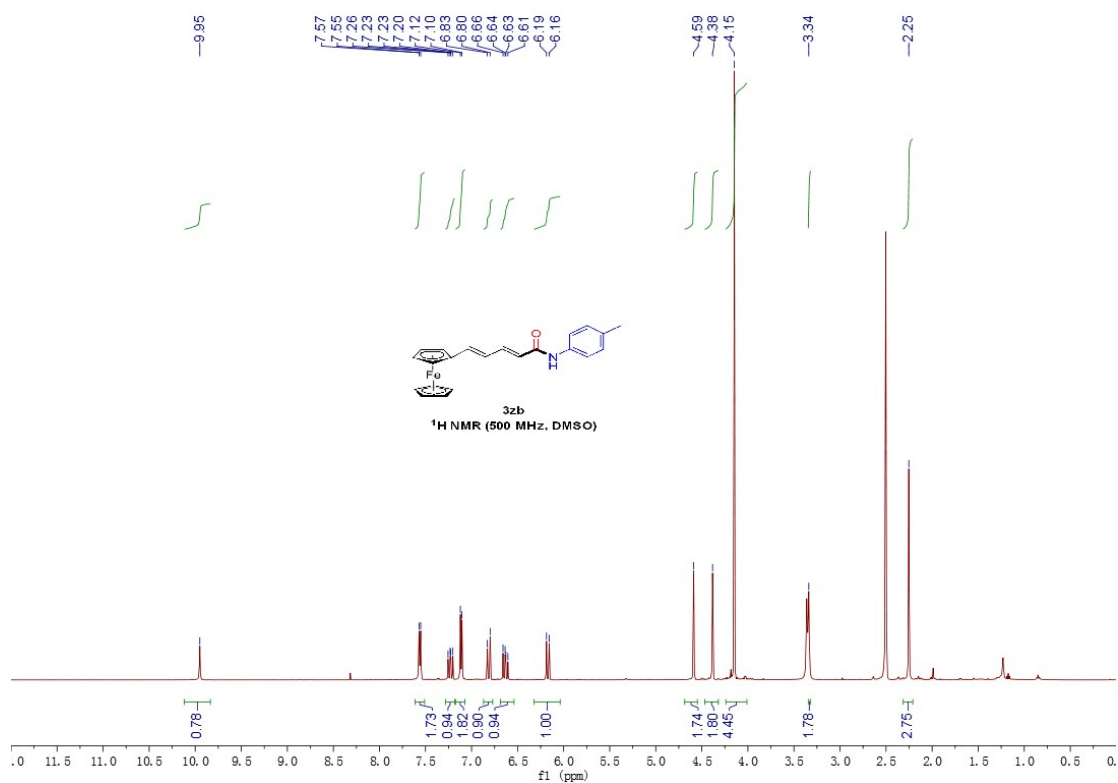

Figure S111. <sup>1</sup>H NMR (500 MHz, DMSO) spectrum of 3zb

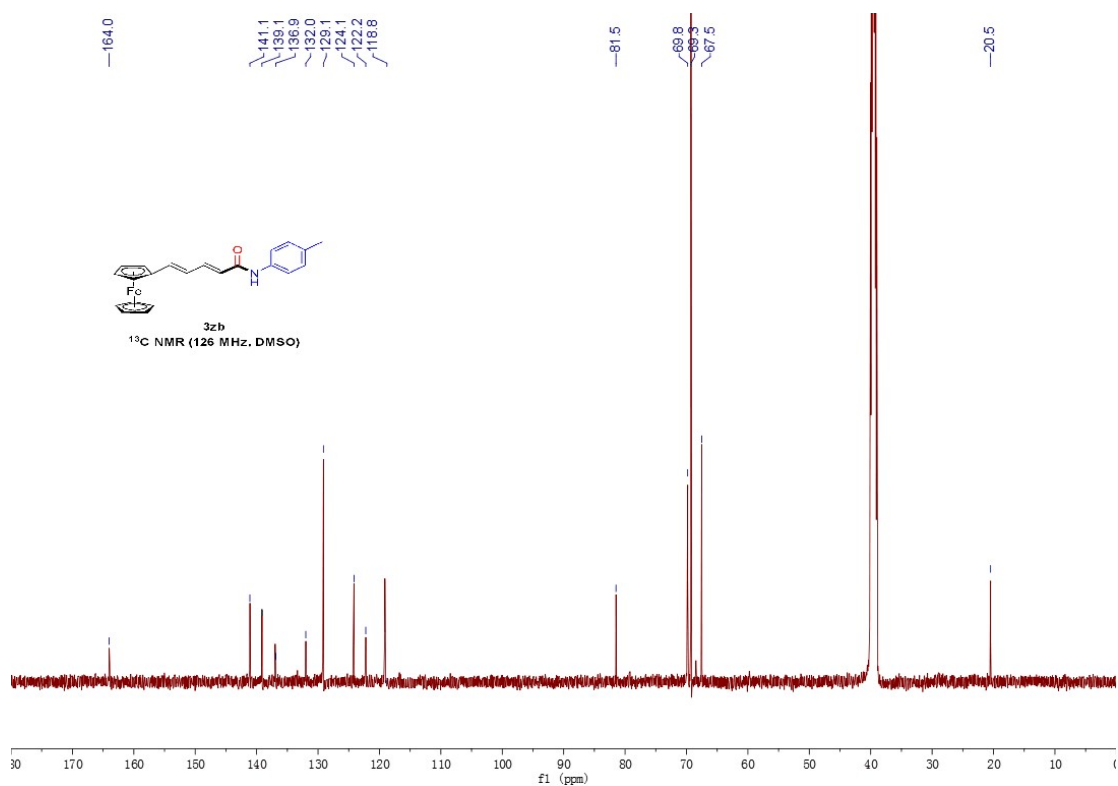

Figure S112. <sup>13</sup>C NMR (126 MHz, DMSO) spectrum of 3zb



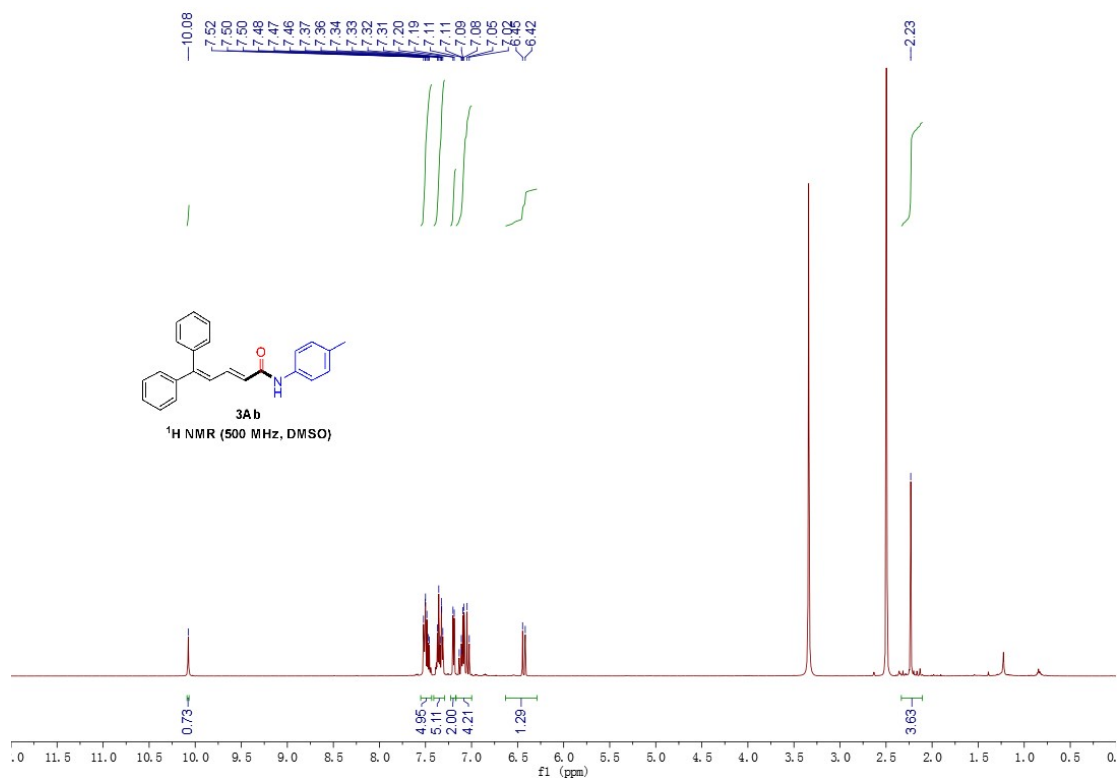

Figure S113. <sup>1</sup>H NMR (500 MHz, DMSO) spectrum of 3Ab

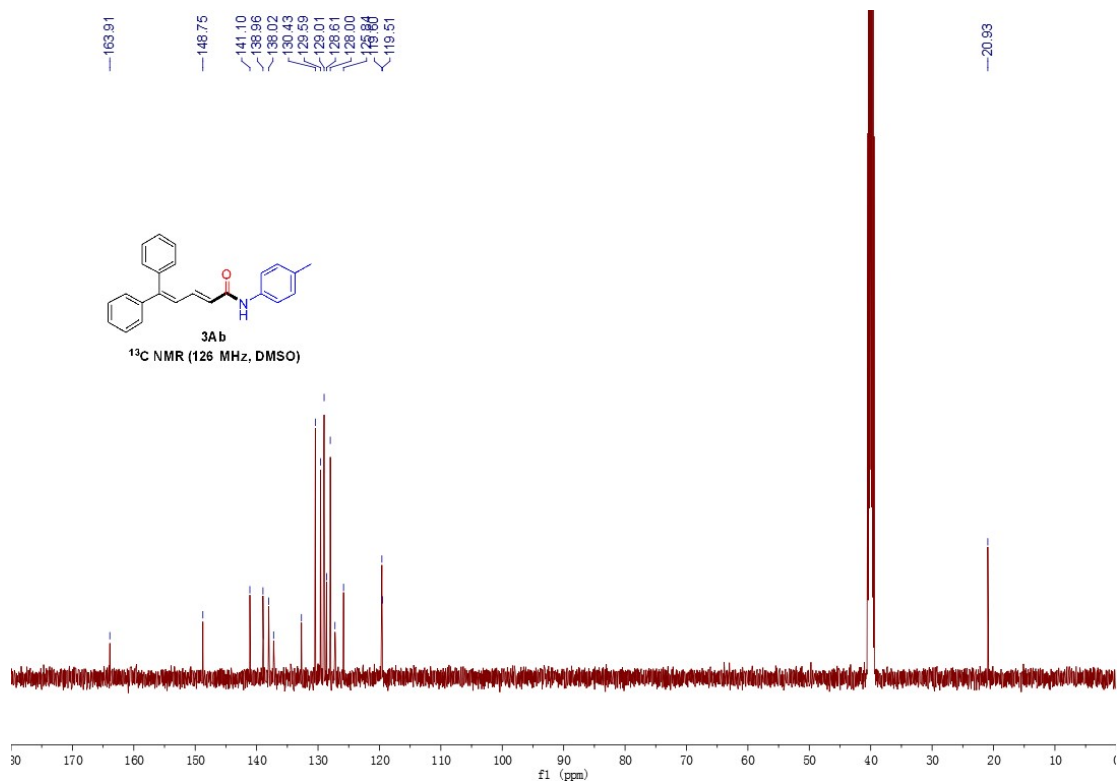

Figure S114. <sup>13</sup>C NMR (126 MHz, DMSO) spectrum of 3Ab

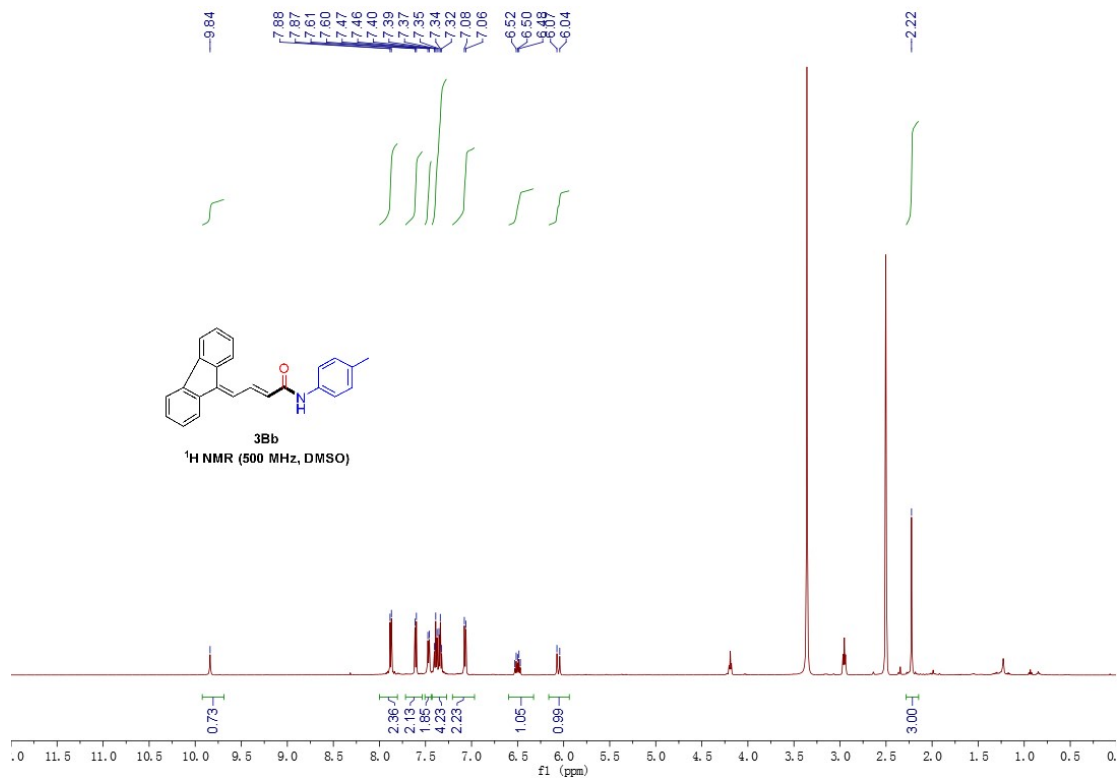

Figure S115. <sup>1</sup>H NMR (500 MHz, DMSO) spectrum of 3Bb

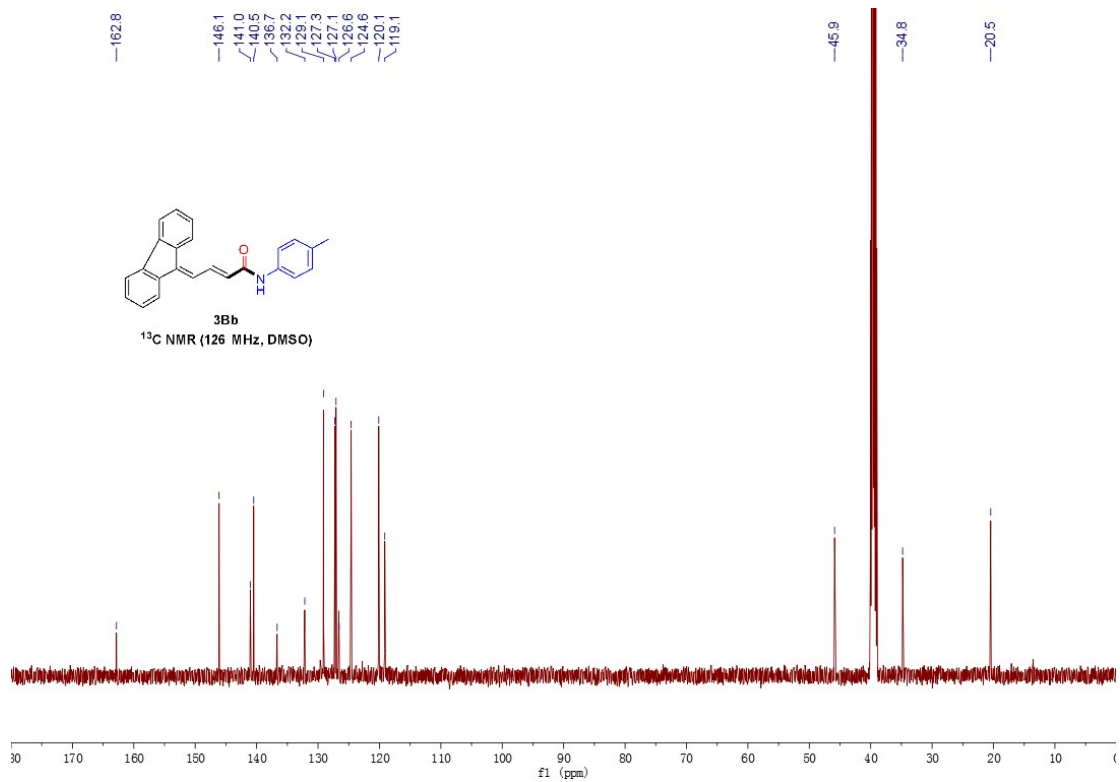

Figure S116. <sup>13</sup>C NMR (126 MHz, DMSO) spectrum of 3Bb

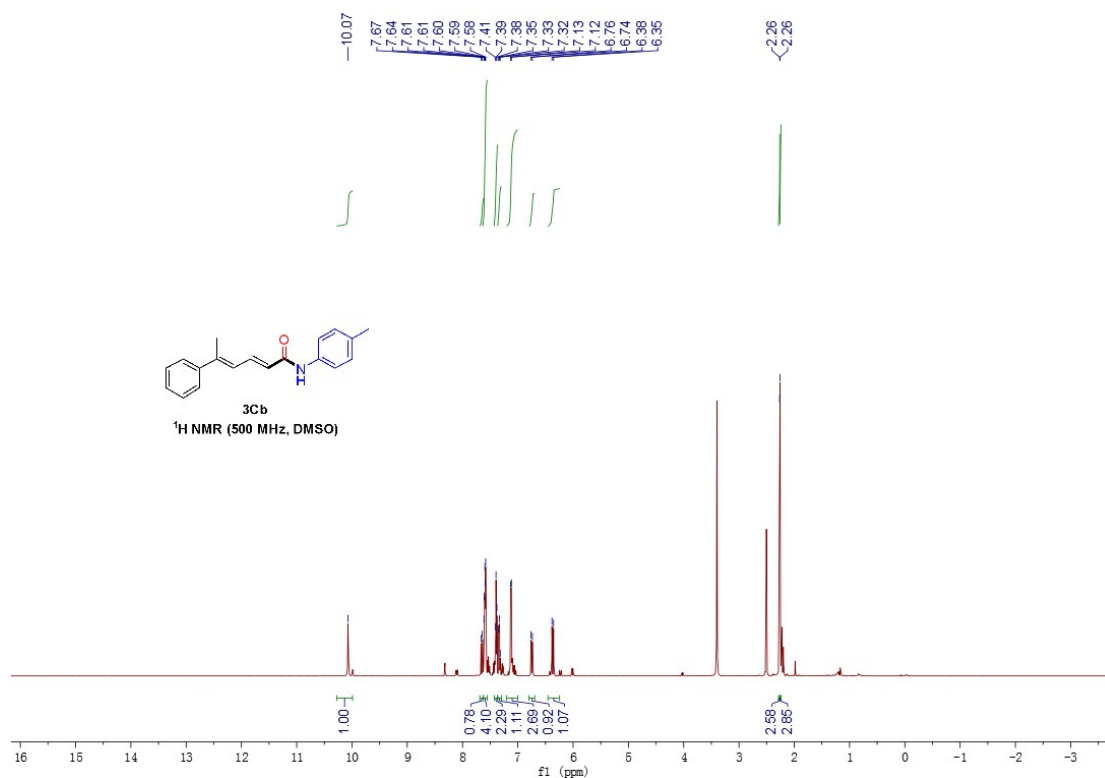

Figure S117. <sup>1</sup>H NMR (500 MHz, DMSO) spectrum of 3Cb

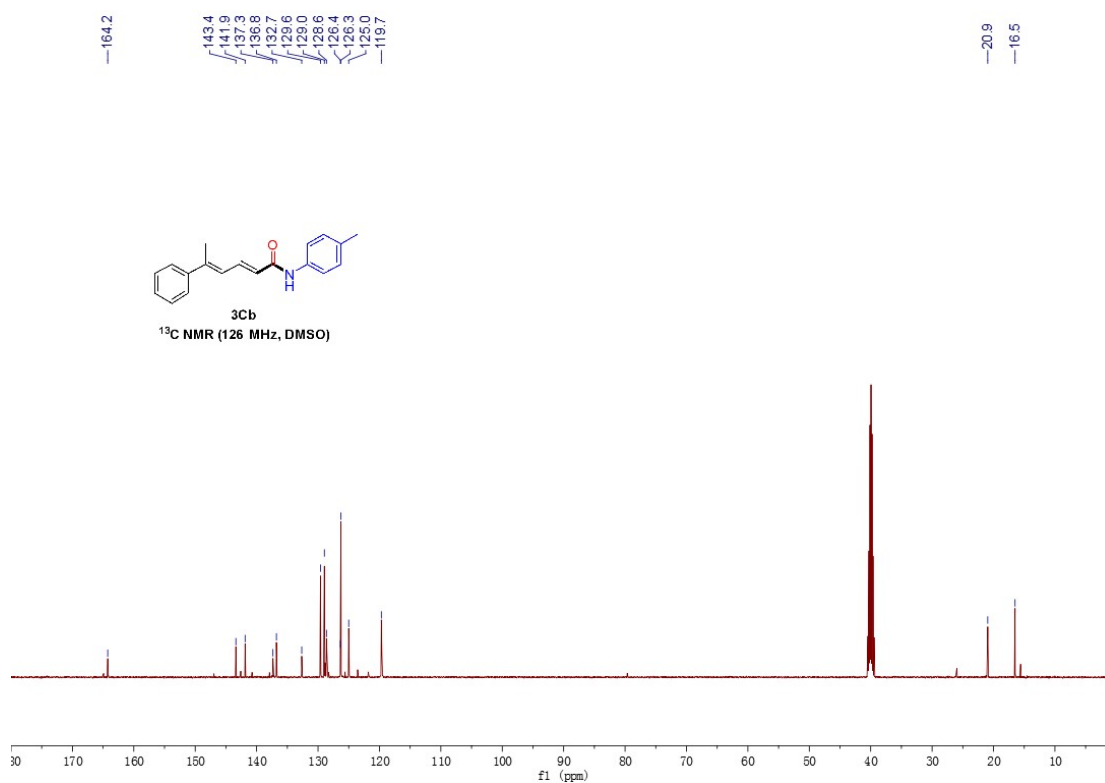

Figure S118. <sup>13</sup>C NMR (126 MHz, DMSO) spectrum of 3Cb

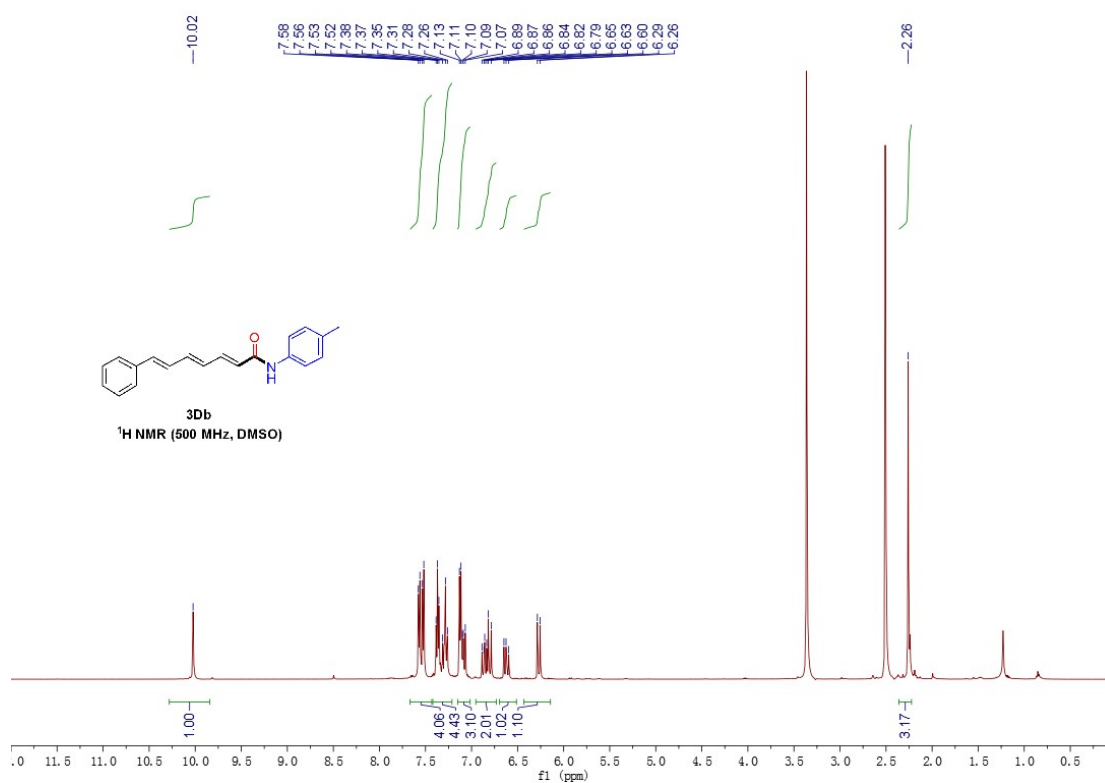

Figure S119. <sup>1</sup>H NMR (500 MHz, DMSO) spectrum of 3Db

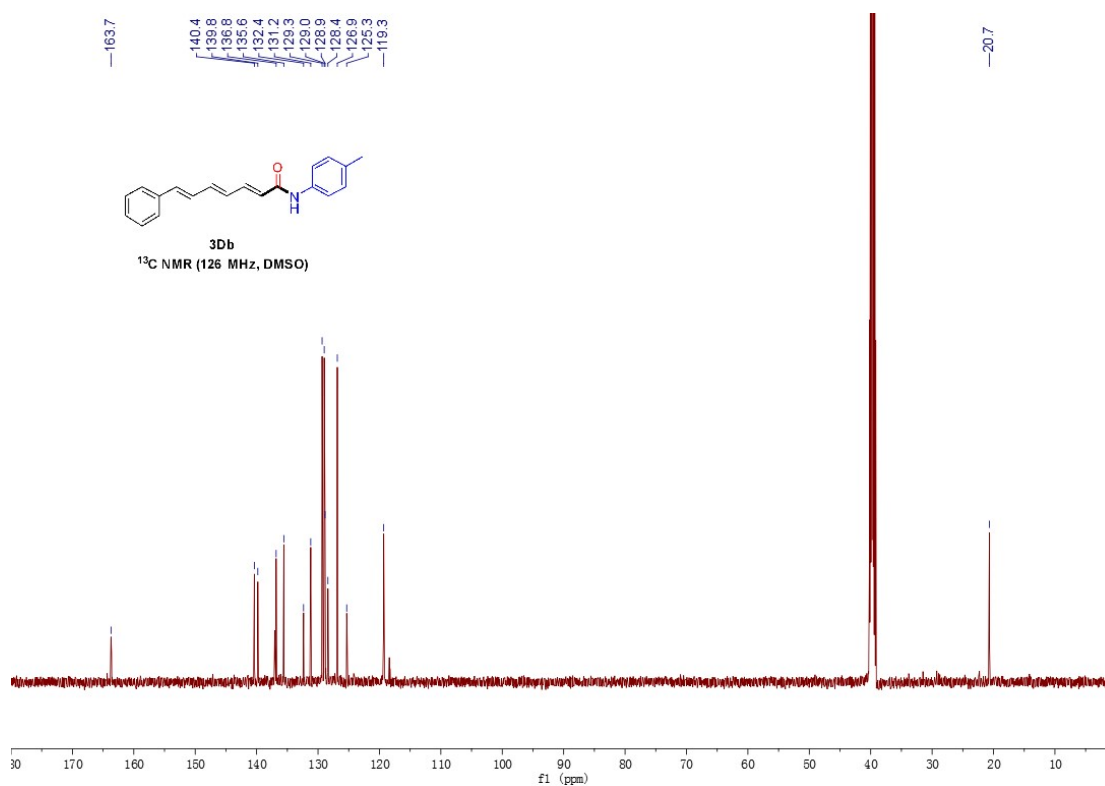

Figure S120. <sup>13</sup>C NMR (126 MHz, DMSO) spectrum of 3Db
